# Supplementary material for: In situ electrochemical H2 production for efficient and stable power-to-gas electromethanogenesis
Source: Royal Society of Chemistry journal article supplement (doi:10.1039/d0gc01894e), 2020-01-01
Supplement: d0gc01894e1.xlsx [file d0gc01894e1.xlsx]

## Sheet: Sheet1
Supplementary table to "In situ electrochemical H2 production for efficient and stable power-to-gas electromethanogenesis" by Frauke Kracke, Joerg S. Deutzmann, Wenyu Gu, and Alfred M. Sporman
Proteomic comarison of the combined samples of E-Chem 1+2 to H2-Control
Results were copied from Perseus output files from a volcano plot analysis. For Raw data, MaxQuant analysis, and Perseus analysis see proteome exchange ???
"Significant": "+" indicates a significantly differentially abundant protein (t-test, 1000 randomizations, FDR=0.05, S0=0.5)
"'-LOG(P-value)": significance level for the detected change for each identified protein
"Difference": The log2-fold change in abundance of each protein. Negative values indicate higher abundance in samples from the E-Chem reactors, positive values indicate higher abundance in samples from the H2-Control reactor.
"Protein IDs": Uniprot IDs of the identified protein
"description": Annotated function of the protein imported from the reference proteome
	Experiment 1			Experiment 2																							log2 transformed normalized intensity values for each identified protein in each sample
Protein IDs	Significant	-LOG(P-value)	Difference	Significant	-LOG(P-value)	Difference		Description								Peptides	Razor + unique peptides	Unique peptides	Sequence coverage [%]	Unique + razor sequence coverage [%]	Unique sequence coverage [%]	Mol. weight [kDa]	Q-value	Score	Intensity	MS/MS count	Exp1 R1W2 normalized intensity	Exp1 R1W3 normalized intensity	Exp1 R1W4 normalized intensity	Exp1 R2W2 normalized intensity	Exp1 R2W3 normalized intensity	Exp1 R2W4 normalized intensity	Exp1 R3W2 normalized intensity	Exp1 R3W3 normalized intensity	Exp1 R3W4 normalized intensity	Exp1 pool normalized intensity	Exp2 R1W1 normalized intensity	Exp2 R1W3 normalized intensity	Exp2 R1W5 normalized intensity	Exp2 R2W1 normalized intensity	Exp2 R2W3 normalized intensity	Exp2 R2W5 normalized intensity	Exp2 R3W1 normalized intensity	Exp2 R3W3 normalized intensity	Exp2 R3W5 normalized intensity	Exp2 pool normalized intensity
Q6LY12	+	2.48892	2.2954	+	2.29361	1.31992		Fe/B12 periplasmic-binding domain-containing protein OS=Methanococcus maripaludis (strain S2 / LL) OX=267377 GN=MMP1181 PE=4 SV=1								2	2	2	6.9	6.9	6.9	41.74	0	8.884	381480000	3	18.5629	17.1013	18.852	15.4253	16.3145	15.256	15.2533	16.7579	16.2531	17.2441	17.1395	15.7701	16.4038	14.9675	14.7526	15.1796	15.7331	15.1412	14.9334	15.5855
Q6LY15	+	2.61282	1.77748	+	2.95422	1.50217		Fe/B12 periplasmic-binding domain-containing protein OS=Methanococcus maripaludis (strain S2 / LL) OX=267377 GN=MMP1178 PE=4 SV=1								12	12	11	44	44	41.3	41.279	0	98.328	2581000000	24	21.0944	19.8182	21.3846	18.7537	19.1978	18.6463	18.5847	19.2965	19.4506	19.9426	20.1629	19.0531	19.5119	17.8073	18.0754	18.1036	18.6326	18.0878	17.7361	18.7156
Q6LXQ2	+	1.04982	0.732101	+	3.21635	2.44851		Formate dehydrogenase beta subunit OS=Methanococcus maripaludis (strain S2 / LL) OX=267377 GN=fdhB PE=4 SV=1								16	16	16	32.3	32.3	32.3	43.091	0	67.619	2996200000	30	20.1011	20.5572	19.7365	20.1068	19.3091	18.5939	19.1787	19.9918	19.2166	19.6218	22.774	22.63	22.3024	20.4419	19.9799	19.9412	20.1252	21.1536	19.0799	21.377
Q6LXQ1	+	0.923341	0.672835	+	3.52092	2.07919		4Fe-4S Mo/W bis-MGD-type domain-containing protein OS=Methanococcus maripaludis (strain S2 / LL) OX=267377 GN=fdhA PE=4 SV=1								14	14	13	24.2	24.2	23.1	74.224	0	60.544	4345600000	34	19.2007	19.7332	18.993	19.5392	18.5961	17.8505	18.2962	19.0298	18.5049	18.9736	21.4991	21.4745	21.2334	19.5159	19.1059	19.2395	19.2789	20.1859	18.613	20.4179
Q6LXQ0	+	0.855169	0.534742	+	3.67769	1.87007		Carbonic anhydrase OS=Methanococcus maripaludis (strain S2 / LL) OX=267377 GN=MMP1299 PE=4 SV=1								8	8	8	73.3	73.3	73.3	16.487	0	55.455	3626300000	13	18.2092	18.7109	17.8859	18.4109	17.4889	17.1228	17.5018	18.1209	17.7583	17.896	21.3629	21.357	20.6676	19.4701	19.0415	19.2546	19.1492	19.8517	18.7877	20.2103
Q6M025	+	0.904768	-1.26512	+	1.39423	-2.00302		Uncharacterized protein OS=Methanococcus maripaludis (strain S2 / LL) OX=267377 GN=MMP0448 PE=4 SV=1								4	4	4	39.4	39.4	39.4	10.743	0	14.554	308000000	5	13.8283	13.8255	13.6406	14.4153	13.6986	16.2029	14.0352	16.7071	15.1203	15.2165	15.3402	15.697	15.6114	15.8178	18.5216	17.5479	16.1079	19.0789	18.2412	17.6583
Q6LZ10	+	1.40361	-1.45341	+	4.007	-0.938529		Coenzyme F420-reducing hydrogenase subunit delta OS=Methanococcus maripaludis (strain S2 / LL) OX=267377 GN=frcD PE=4 SV=1								7	7	7	48.2	48.2	48.2	18.213	0	67.932	3991500000	15	19.7545	21.1046	18.1503	21.2017	21.2012	21.4021	21.2174	20.9638	20.7532	20.8943	19.7077	19.671	19.7415	20.6583	20.9196	20.4479	20.6375	20.4078	20.8005	20.3933
Q6LZY0	+	3.19442	-1.63052	+	2.48763	-1.1119		Probable metal chelatase OS=Methanococcus maripaludis (strain S2 / LL) OX=267377 GN=MMP0493 PE=4 SV=1								5	5	5	6	6	6	228.9	0	11.39	67523000	6	11.4778	11.1019	12.1356	13.6894	13.4882	13.2391	12.8701	12.9687	12.958	12.8402	15.6101	15.9785	15.6578	17.1192	16.8327	16.0891	17.2085	16.8539	17.0607	16.6253
Q6LZ64	+	3.93524	1.99153		0.00246884	0.00260576		Uncharacterized protein OS=Methanococcus maripaludis (strain S2 / LL) OX=267377 GN=MMP0765 PE=4 SV=1								18	18	18	61.1	61.1	61.1	38.848	0	97.929	7567500000	26	22.1539	21.9791	21.0816	20.1637	19.693	19.6009	19.4765	19.7447	19.8014	20.7327	18.7009	17.3405	17.5059	18.4403	17.4395	17.6032	18.0819	17.7962	17.718	18.006
Q6LYJ5	+	3.61559	1.87497		0.579173	0.862487		Uncharacterized protein OS=Methanococcus maripaludis (strain S2 / LL) OX=267377 GN=MMP0996 PE=4 SV=1								1	1	1	16.1	16.1	16.1	9.8072	0	4.0043	347530000	2	16.5246	15.9838	16.2835	14.2291	14.4928	14.1314	13.7788	14.8694	14.8326	15.2418	17.9101	16.9876	15.9578	15.116	16.5887	15.3216	15.3633	17.7406	16.4056	16.7073
Q6M0Q4	+	2.48149	1.74496		0.167616	0.251038		Uncharacterized protein OS=Methanococcus maripaludis (strain S2 / LL) OX=267377 GN=MMP0215 PE=4 SV=1								5	5	5	41.2	41.2	41.2	15.986	0	19.465	1368900000	10	19.2447	18.6627	19.0768	16.8499	16.8762	18.4151	16.6398	17.4145	17.3032	18.0175	19.2115	19.0954	17.7176	17.5238	19.0775	17.7949	17.7416	19.3887	19.0164	18.6246
Q6LY16	+	1.09286	1.63367		0.766971	0.311675		Fe/B12 periplasmic-binding domain-containing protein OS=Methanococcus maripaludis (strain S2 / LL) OX=267377 GN=MMP1177 PE=4 SV=1								4	4	4	28.9	28.9	28.9	23.545	0	21.591	425420000	4	17.6507	15.9667	18.3432	14.5316	16.0048	15.0518	14.6645	16.8996	16.9669	16.8261	17.251	16.8591	16.6494	17.0076	16.839	16.5305	16.4804	16.2052	16.5864	16.4388
Q6LYW1	+	1.19267	1.59228		0.0503203	-0.0119343		Methyltransf_25 domain-containing protein OS=Methanococcus maripaludis (strain S2 / LL) OX=267377 GN=MMP0874 PE=4 SV=1								4	4	4	30.2	30.2	30.2	31.282	0	14.339	210700000	6	17.7404	14.684	17.9404	14.7019	15.7235	15.1148	14.9102	15.2281	15.4973	16.3316	14.1454	13.8154	14.0508	14.0086	13.8906	14.0237	14.1667	14.0282	13.9769	14.0394
Q6LZZ4	+	1.95549	1.54298		0.53039	-0.675073		Uncharacterized protein OS=Methanococcus maripaludis (strain S2 / LL) OX=267377 GN=MMP0479 PE=4 SV=1								10	10	10	69.9	69.9	69.9	15.702	0	42.907	9819800000	23	20.4091	20.9398	21.4897	19.2914	19.1226	18.4971	19.1174	20.1238	20.2672	20.1741	18.0739	18.3412	18.4249	17.834	18.7586	19.0309	18.1468	19.3265	20.6337	19.0483
Q6LYM9	+	3.74462	1.45709		0.081163	0.116393		Uncharacterized protein OS=Methanococcus maripaludis (strain S2 / LL) OX=267377 GN=MMP0961 PE=4 SV=1								26	26	26	52.7	52.7	52.7	56.157	0	87.644	12644000000	60	22.884	22.4095	22.6093	20.9211	21.0609	21.1705	20.8843	21.3231	21.7028	21.7926	22.2282	21.7026	20.9274	20.5904	21.933	21.12	20.8695	22.6073	21.8978	21.7645
Q6LZ00	+	4.24762	1.41856		0.130142	-0.171875		Coenzyme B12-binding:Cobalamin-dependent methionine synthase, B12-binding OS=Methanococcus maripaludis (strain S2 / LL) OX=267377 GN=MMP0829 PE=4 SV=1								12	12	12	60.3	60.3	60.3	24.165	0	68.661	3621200000	25	20.984	20.6197	21.0272	19.5211	19.5547	19.6654	19.6801	19.1392	19.1899	20.0134	20.1048	17.6189	18.9612	19.2987	19.1966	19.1892	19.2877	18.6165	18.8126	19.0596
Q6M0T6	+	1.97678	1.34299		0.0567819	-0.0755854		Uncharacterized protein OS=Methanococcus maripaludis (strain S2 / LL) OX=267377 GN=MMP0182 PE=4 SV=1								2	2	2	27.1	27.1	27.1	8.3027	0	4.3165	46780000	2	17.385	17.5513	16.5134	15.1915	15.2823	16.3983	15.5429	16.0083	16.4184	16.4349	15.6115	14.8422	13.7955	14.3062	15.2283	14.2636	14.4414	15.2998	15.4125	14.7982
Q6M0X0	+	1.24251	1.31542		0.219234	0.178981		Acetyl-CoA synthetase, AMP-forming OS=Methanococcus maripaludis (strain S2 / LL) OX=267377 GN=acsA PE=4 SV=1								24	24	24	46.1	46.1	46.1	71.808	0	90.694	4004000000	41	20.3557	20.4413	21.1952	19.6517	21.0531	18.5575	18.8441	18.737	19.2485	20.0382	20.4691	21.7943	21.7293	21.5407	20.9793	21.0569	21.4549	20.8171	21.0627	21.2488
Q6LX77	+	4.54415	1.24648		0.423905	0.284065		Uncharacterized protein OS=Methanococcus maripaludis (strain S2 / LL) OX=267377 GN=MMP1475 PE=4 SV=1								3	3	3	12.6	12.6	12.6	31.369	0	12.652	237960000	7	18.0057	17.8536	18.1826	16.7659	16.8442	16.858	16.3859	16.8639	16.8871	17.2981	17.2112	17.2494	16.7963	16.2501	17.0504	16.6407	16.44	17.5879	16.8402	16.9629
Q6LZJ9	+	2.71549	1.23911		0.16478	0.156491		TOBE domain-containing protein OS=Methanococcus maripaludis (strain S2 / LL) OX=267377 GN=MMP0628 PE=4 SV=1								5	5	5	64.7	64.7	64.7	7.2315	0	33.287	11740000000	12	19.6918	19.7215	19.7068	18.3832	18.0756	18.7037	17.9051	18.6816	19.0564	19.0152	18.64	18.0911	17.2889	17.5438	18.0212	17.2121	17.8546	18.5151	17.9544	17.9879
Q6LY17	+	1.03989	1.15977		1.63247	1.06315		Fe/B12 periplasmic-binding domain-containing protein OS=Methanococcus maripaludis (strain S2 / LL) OX=267377 GN=MMP1176 PE=4 SV=1								4	3	3	34.8	29.4	29.4	20.216	0	13.333	279410000	5	17.0414	15.4482	17.7386	14.7614	15.6252	15.1916	15.2405	16.1551	16.5241	16.4092	17.4738	15.8578	16.0372	15.4649	15.2918	15.4548	15.8109	15.0456	15.2906	15.8315
Q6LZ44	+	3.1546	1.15043		0.0242088	0.0146453		Chymotrypsin serine protease, family S1 OS=Methanococcus maripaludis (strain S2 / LL) OX=267377 GN=dop PE=4 SV=1								4	4	4	27.1	27.1	27.1	28.211	0	17.127	162410000	4	17.9665	17.6439	17.7244	16.3575	16.6346	17.1064	16.2033	16.7194	16.7456	17.0851	14.706	14.7365	14.4546	14.1238	14.7537	14.4868	14.522	15.1302	14.6898	14.6305
P61819	+	2.24799	1.1009		0.0495517	-0.0314194		Sirohydrochlorin cobaltochelatase OS=Methanococcus maripaludis (strain S2 / LL) OX=267377 GN=cbiX PE=3 SV=1								10	10	10	56.2	56.2	56.2	16.107	0	32.964	8451600000	30	22.7793	21.6746	22.8544	21.2375	21.4021	20.9652	21.356	21.5116	21.5387	21.8363	20.2908	19.5757	20.0667	19.8938	19.8589	19.705	20.5202	19.8962	20.1809	20.0069
Q6LY91	+	1.13655	1.0986		0.181888	-0.432295		TrmB domain-containing protein OS=Methanococcus maripaludis (strain S2 / LL) OX=267377 GN=MMP1100 PE=4 SV=1								7	7	7	67.4	67.4	67.4	15.565	0	32.407	451310000	12	16.9625	18.3176	17.7706	16.2638	16.0215	16.1784	15.9617	17.359	17.7252	17.2405	19.8705	18.1589	17.3157	17.1703	19.7132	18.3892	17.6506	20.399	19.9617	19.3414
Q6LWU6	+	2.42467	1.07848		0.0844894	-0.114225		Rubrerythrin domain-containing protein OS=Methanococcus maripaludis (strain S2 / LL) OX=267377 GN=MMP1608 PE=4 SV=1								6	6	6	52	52	52	11.761	0	34.816	772330000	9	19.6679	19.6366	19.4113	18.0581	18.0319	18.3143	18.7085	18.8612	18.9867	18.867	18.4957	18.3119	16.6404	17.4833	18.1795	17.551	17.4148	18.6134	18.3391	18.0133
Q6M061	+	4.40504	1.07169		2.19983	0.227157		Ribose-phosphate pyrophosphokinase OS=Methanococcus maripaludis (strain S2 / LL) OX=267377 GN=prsA PE=3 SV=1								6	6	6	24.7	24.7	24.7	31.026	0	31.425	421010000	12	19.1596	18.7299	19.0051	17.8169	17.9886	17.7104	18.093	17.9457	17.8045	18.3662	18.515	18.7467	18.6653	18.4382	18.457	18.4985	18.3533	18.4188	18.3252	18.4492
Q6LXQ5	+	3.59613	1.04985		0.392535	0.288325		Glycosyl transferase, group 1 OS=Methanococcus maripaludis (strain S2 / LL) OX=267377 GN=glgA PE=4 SV=1								2	2	2	6.3	6.3	6.3	59.634	0	8.0867	98141000	4	16.391	16.1974	16.2423	14.9946	15.116	15.4082	14.9127	15.4943	15.4365	15.753	16.8412	16.5338	15.8702	15.6935	16.4254	15.6278	16.0072	16.7916	16.215	16.3393
Q6LYV2	+	4.88865	1.02085		1.62206	0.353758		TPR_REGION domain-containing protein OS=Methanococcus maripaludis (strain S2 / LL) OX=267377 GN=MMP0885 PE=4 SV=1								7	7	7	21.6	21.6	21.6	45.34	0	31.281	178660000	8	18.0488	17.9027	17.8274	16.9159	16.8664	16.7817	16.7359	17.101	17.0318	17.4253	18.4363	17.9152	18.1033	17.7551	17.8131	17.6012	17.8574	17.967	17.7931	17.9717
Q6LZB9	+	2.32612	0.994984		0.283445	-0.0663969		Cation_ATPase_N domain-containing protein OS=Methanococcus maripaludis (strain S2 / LL) OX=267377 GN=MMP0710 PE=4 SV=1								4	4	4	8	8	8	102.44	0	8.7684	44485000	6	14.916	14.9751	15.5217	13.8084	14.0517	14.4889	13.6753	14.4619	14.3693	14.6565	14.3479	14.2145	14.1633	14.1573	14.2214	14.2993	14.3155	14.5979	14.2583	14.304
Q6LZ37	+	1.99258	0.989227		0.309588	0.178491		Peptidase_S15 domain-containing protein OS=Methanococcus maripaludis (strain S2 / LL) OX=267377 GN=MMP0792 PE=4 SV=1								5	5	5	19.6	19.6	19.6	36.754	0	15.555	370740000	9	17.1899	17.1597	17.1022	15.814	16.1378	17.0084	15.6437	16.2696	16.0948	16.5493	17.5215	16.9671	16.6484	16.5195	17.0777	16.5951	16.7283	17.2871	16.9952	16.9887
Q6M059	+	2.85565	0.986655		0.481413	0.144345		Uncharacterized protein OS=Methanococcus maripaludis (strain S2 / LL) OX=267377 GN=MMP0412 PE=4 SV=1								2	2	2	6.8	6.8	6.8	48.285	0	5.8233	24953000	2	14.3697	13.9407	14.3443	13.1215	13.4326	12.7714	13.5593	13.3844	13.1202	13.8059	14.9805	14.651	15.1111	14.7932	14.8159	15.0861	14.6165	14.6723	14.6352	14.6293
Q6LZ21	+	3.59595	0.970636		0.805948	0.144709		4Fe-4S ferredoxin-type domain-containing protein OS=Methanococcus maripaludis (strain S2 / LL) OX=267377 GN=MMP0808 PE=4 SV=1								11	11	11	34.5	34.5	34.5	45.245	0	52.342	1173000000	18	19.7387	19.4879	19.4187	18.6508	18.4681	18.8404	18.2312	18.7245	18.5516	19.0084	17.7032	17.6887	17.4721	17.4532	17.5133	17.4872	17.3485	17.7003	17.3571	17.5633
Q6LWS2	+	3.67824	0.952741		0.084728	-0.0656633		UPF0033 domain-containing protein OS=Methanococcus maripaludis (strain S2 / LL) OX=267377 GN=MMP1634 PE=4 SV=1								13	13	13	51.4	51.4	51.4	31.179	0	64.894	3641200000	42	20.9161	20.6868	20.8355	19.6597	19.8181	20.1631	19.5998	20.0311	19.8886	20.2327	20.6206	20.2125	19.5143	19.8566	20.3583	19.7768	20.1535	20.5727	20.3707	20.2138
Q6LYZ9	+	2.4809	0.901813		0.457263	0.25512		Uroporphyrinogen_deCOase domain-containing protein OS=Methanococcus maripaludis (strain S2 / LL) OX=267377 GN=mtaA PE=4 SV=1								10	10	10	30.9	30.9	30.9	39.841	0	55.421	2205000000	25	20.8775	20.4046	20.9087	19.679	20.0944	20.2377	19.8917	19.5525	19.5153	20.1838	19.7674	18.5083	19.222	19.0003	18.9544	18.9193	19.0663	18.882	18.6424	19.0295
Q6LZA9	+	1.88094	0.869893		0.00288278	0.00296179		Hydroxylamine reductase OS=Methanococcus maripaludis (strain S2 / LL) OX=267377 GN=hcp PE=3 SV=1								29	29	29	53.5	53.5	53.5	60.224	0	156.68	7602200000	68	22.4355	21.652	22.3139	20.8294	21.1286	21.6335	20.9259	21.4448	21.6212	21.6553	21.8578	21.2907	20.8592	20.7203	21.5521	20.8012	21.3649	21.9464	21.6128	21.4168
Q6LZJ8	+	1.45746	0.855582		1.53116	0.531613		TrmB domain-containing protein OS=Methanococcus maripaludis (strain S2 / LL) OX=267377 GN=MMP0629 PE=4 SV=1								8	8	8	75.8	75.8	75.8	14.749	0	34.814	3350100000	18	20.0394	20.0324	19.3837	19.1873	18.6449	18.0954	19.2104	19.3113	19.3282	19.3825	19.6684	19.6534	19.0518	19.1317	18.7539	18.8272	18.877	19.2949	18.6728	19.0866
Q6LWP0	+	1.15757	0.825902		0.107355	-0.0406033		Flagella accessory protein C OS=Methanococcus maripaludis (strain S2 / LL) OX=267377 GN=flaC PE=4 SV=1								2	2	2	8.6	8.6	8.6	21.32	0.0010537	3.4076	51487000	2	13.9907	14.0081	14.2648	13.7903	14.0992	12.2626	13.2343	13.0848	13.1006	13.4817	16.3769	16.0578	16.1615	16.4712	16.0761	16.2015	16.5213	16.1643	16.0017	16.3653
Q6LYM5	+	1.8839	0.808181		1.44242	0.501457		Formylmethanofuran dehydrogenase subunit E related protein OS=Methanococcus maripaludis (strain S2 / LL) OX=267377 GN=MMP0965 PE=4 SV=1								6	6	6	28.6	28.6	28.6	22.368	0	27.506	1528800000	12	19.3401	18.5065	19.5948	18.0362	18.4505	18.1949	18.3148	18.5189	18.5184	18.7235	18.5114	18.6661	18.4275	18.0127	17.8219	18.0629	18.6401	17.858	17.8057	18.2564
Q6LY34	+	1.82548	0.802493		0.111025	-0.139681		Ferritin-like diiron domain-containing protein OS=Methanococcus maripaludis (strain S2 / LL) OX=267377 GN=MMP1159 PE=4 SV=1								5	5	5	46.2	46.2	46.2	19.94	0	41.295	1788200000	12	20.0725	19.8914	19.6909	18.5565	18.7802	19.2204	18.8981	19.5403	19.4993	19.4615	19.9246	19.2252	18.4309	18.7108	19.6883	18.6271	19.0474	20.1547	19.7713	19.4042
Q6M064	+	2.28685	0.794294		0.932053	0.151432		Conserved hypothetical archaeal protein with 2 CBS domains OS=Methanococcus maripaludis (strain S2 / LL) OX=267377 GN=MMP0407 PE=4 SV=1								7	7	7	51.1	51.1	51.1	14.998	0	29.84	5220100000	16	20.0418	20.0277	19.7215	19.3033	18.8826	18.6926	19.1284	19.2432	19.5662	19.4904	20.2595	20.2417	20.1309	19.8178	20.1268	20.1236	20.0018	20.1996	20.0861	20.1434
Q6LWZ8	+	2.94566	0.793002		0.623401	-0.143786		Methyl-coenzyme M reductase I, protein D OS=Methanococcus maripaludis (strain S2 / LL) OX=267377 GN=mcrD PE=4 SV=1								10	10	10	64.2	64.2	64.2	18.083	0	29.866	4355600000	24	21.2712	21.1258	21.1721	20.4736	20.3931	19.9087	20.4994	20.558	20.5475	20.7068	20.3771	19.9647	20.2008	20.1816	20.5337	20.1993	20.2848	20.4054	20.3432	20.2298
Q6M0Z3	+	1.36857	0.765702		0.322427	-0.128603		Conserved archaeal fibrillarin homolog OS=Methanococcus maripaludis (strain S2 / LL) OX=267377 GN=flpA PE=4 SV=1								13	13	13	27.8	27.8	27.8	56.878	0	63.56	2831000000	22	19.8668	19.4089	20.62	19.0136	19.4582	19.6997	18.8404	19.3088	18.8765	19.6017	19.7788	19.7239	19.5786	19.6037	19.9718	19.9253	19.7464	19.4565	20.2304	19.835
Q6LX13	+	3.56618	0.757221		0.302491	-0.15815		Conserved hypothetical Archael protein OS=Methanococcus maripaludis (strain S2 / LL) OX=267377 GN=MMP1540 PE=4 SV=1								5	5	5	22	22	22	29.91	0	20.573	408900000	10	19.0088	18.7677	18.6041	17.9555	18.092	18.0426	17.8944	18.2779	17.9555	18.4008	17.2596	16.8099	16.767	16.8636	17.0356	16.9351	17.0029	17.76	17.0245	17.1111
Q6LY19	+	2.54382	0.753353		0.00579416	0.00625197		Peroxiredoxin OS=Methanococcus maripaludis (strain S2 / LL) OX=267377 GN=MMP1174 PE=3 SV=1								14	14	14	65.9	65.9	65.9	24.968	0	94.667	5832000000	30	20.7034	20.3117	20.4971	19.3331	19.703	20.046	19.6585	19.9592	19.8046	20.011	20.8624	20.2576	19.505	19.8654	20.4608	19.5916	20.1063	20.7562	20.432	20.241
Q6LXK3	+	3.15829	0.752677		0.113624	0.0349045		CBFD_NFYB_HMF domain-containing protein OS=Methanococcus maripaludis (strain S2 / LL) OX=267377 GN=HMmB PE=4 SV=1								4	4	4	56.1	56.1	56.1	7.0152	0	22.195	43662000000	46	24.3958	24.4387	24.3322	23.7736	23.5145	23.2894	23.6186	23.7144	23.907	23.9822	23.1117	23.1775	22.7599	22.9899	23.1081	22.7905	23.0186	22.8698	23.112	23.0451
Q6LZJ7	+	1.32078	0.752348		0.18192	0.312069		FeoB-type G domain-containing protein OS=Methanococcus maripaludis (strain S2 / LL) OX=267377 GN=feoB PE=4 SV=1								8	8	8	14.4	14.4	14.4	72.477	0	48.356	539980000	14	18.4573	16.9434	17.2114	16.7302	16.6925	16.7919	16.6669	17.0054	16.8234	17.2078	17.2618	17.2561	19.3754	17.1413	17.4296	19.3058	17.2306	17.5487	17.2582	18.1286
Q6M1B0	+	3.20293	0.749789		0.0270466	-0.00945473		3-dehydroquinate synthase OS=Methanococcus maripaludis (strain S2 / LL) OX=267377 GN=aroB PE=3 SV=1								20	20	20	57.6	57.6	57.6	40.002	0	85.592	3582700000	40	20.7224	20.2792	20.3119	19.6535	19.8584	19.8676	19.5746	19.6641	19.5101	19.9716	20.0194	20.3549	20.4838	20.2798	20.1704	20.497	20.2777	20.1507	20.3972	20.2583
Q6LYT6	+	4.27416	0.736982		0.404599	-0.124534		OBG-type G domain-containing protein OS=Methanococcus maripaludis (strain S2 / LL) OX=267377 GN=MMP0901 PE=4 SV=1								12	12	12	50.7	50.7	50.7	38.909	0	49.73	1441200000	22	19.0968	19.0319	18.753	18.3003	18.2443	18.231	18.1091	18.1441	18.3127	18.5264	18.6313	18.3622	18.9303	18.5643	18.7736	18.7668	18.6692	18.9807	18.8401	18.6935
Q6LY36	+	1.86158	0.727184		0.307348	-0.258864		Desulfoferrodox domain-containing protein OS=Methanococcus maripaludis (strain S2 / LL) OX=267377 GN=rbo PE=4 SV=1								6	6	6	38.1	38.1	38.1	13.628	0	13.572	1899200000	12	19.4526	19.691	19.4631	18.4527	18.57	19.0863	18.4781	18.9326	19.3306	19.1201	20.1794	20.002	19.156	19.5317	20.2344	19.4825	19.9514	20.7684	20.2594	20.0869
Q6M0Z2	+	0.769584	0.723313		0.693004	-0.517995		Biotin synthetase OS=Methanococcus maripaludis (strain S2 / LL) OX=267377 GN=bioB PE=4 SV=1								10	10	10	35.8	35.8	35.8	37.572	0	30.263	927680000	18	18.6895	18.2024	20.3448	18.1716	18.6762	18.9122	18.0943	18.1249	18.1541	18.7966	19.0744	19.0346	19.1333	18.9957	20.1427	20.1222	19.1261	18.9943	20.2113	19.5576
Q6LX44	+	2.07825	0.722772		0.0143324	0.0074571		DUF357 domain-containing protein OS=Methanococcus maripaludis (strain S2 / LL) OX=267377 GN=MMP1508 PE=4 SV=1								3	3	3	29.7	29.7	29.7	11.427	0	7.7845	162040000	4	15.7068	15.3879	15.4151	14.3973	14.6258	15.3241	14.8595	14.6511	14.8252	14.9788	15.4853	15.9529	15.6231	15.2767	15.8474	15.9685	15.4856	15.7702	15.7294	15.6264
Q6M132	+	2.36748	0.720361		0.144147	0.0742005		Putative transcriptional regulatory protein MMP0086 OS=Methanococcus maripaludis (strain S2 / LL) OX=267377 GN=MMP0086 PE=3 SV=2								3	3	3	36.9	36.9	36.9	17.347	0	16.846	132420000	4	17.053	17.1409	16.7763	16.2934	16.1407	16.6414	15.9023	16.1563	16.4842	16.599	13.5939	13.9054	13.1212	13.5657	13.5772	13.1432	13.2982	13.4687	13.7428	13.7206
Q6LZK5	+	3.9184	0.716464		0.971312	0.441719		ADP-ribosylglycohydrolase (DraG) homolog OS=Methanococcus maripaludis (strain S2 / LL) OX=267377 GN=MMP0622 PE=4 SV=1								5	5	5	27.2	27.2	27.2	33.355	0	21.553	234300000	6	17.2405	17.1538	17.0579	16.4783	16.362	16.6317	16.1963	16.4484	16.4889	16.6684	16.6677	16.7025	16.0419	16.0129	16.2226	15.5522	15.9441	16.5177	15.9243	16.1875
Q6LY29	+	1.16183	0.699696		0.0369974	-0.0321089		HMA domain-containing protein OS=Methanococcus maripaludis (strain S2 / LL) OX=267377 GN=MMP1164 PE=4 SV=1								2	2	2	26.3	26.3	26.3	8.5909	0	13.271	324450000	3	16.3415	16.2816	15.9322	15.3858	15.17	15.6727	14.6655	15.9006	16.1177	15.7464	16.9832	16.9447	16.6188	16.3945	17.4336	16.3699	16.8274	17.4958	16.7649	16.8614
Q6LXA5	+	2.61449	0.696646		0.656982	0.2258		HTH cro/C1-type domain-containing protein OS=Methanococcus maripaludis (strain S2 / LL) OX=267377 GN=MMP1447 PE=4 SV=1								3	3	3	18.9	18.9	18.9	24.729	0	10.083	213470000	6	17.9028	17.9943	17.8953	17.3809	17.0275	16.9696	17.079	17.6137	17.3343	17.4721	17.2812	17.2679	17.0747	16.876	17.307	17.3495	16.7863	16.8103	16.7637	16.9692
Q6M0V0	+	4.72179	0.690928		0.814519	-0.334979		PadR domain-containing protein OS=Methanococcus maripaludis (strain S2 / LL) OX=267377 GN=MMP0168 PE=4 SV=1								4	4	4	23	23	23	17.666	0	6.0646	191340000	4	18.2161	18.0341	18.0335	17.3971	17.5055	17.5096	17.2981	17.4052	17.3062	17.6712	16.0028	15.7319	15.6907	16.5626	16.1499	15.7815	16.515	15.8379	16.0138	16.0764
Q6M162	+	3.33139	0.69008		0.36012	0.0681594		PUA domain-containing protein OS=Methanococcus maripaludis (strain S2 / LL) OX=267377 GN=MMP0055 PE=4 SV=1								5	5	5	44	44	44	17.783	0	34.332	711950000	8	19.2675	19.062	19.1381	18.4488	18.4884	18.1252	18.5772	18.5899	18.5652	18.7227	19.6718	19.646	19.621	19.4604	19.6814	19.4818	19.4286	19.6627	19.7538	19.5479
Q6M088	+	2.94154	0.680634		0.936946	0.291444		S-layer protein OS=Methanococcus maripaludis (strain S2 / LL) OX=267377 GN=slp PE=4 SV=1								28	28	28	53.2	53.2	53.2	58.948	0	246.16	352500000000	620	26.2621	26.3982	26.4795	25.8632	25.6381	25.9748	25.3837	25.6766	25.6594	25.9588	26.2494	26.2042	26.1334	25.6346	26.0821	25.7634	25.6318	26.291	26.0223	26.062
Q6LY61	+	2.52171	0.677167		0.0310517	-0.0169961		Uncharacterized protein OS=Methanococcus maripaludis (strain S2 / LL) OX=267377 GN=MMP1130 PE=4 SV=1								2	2	2	26.5	26.5	26.5	14.979	0	8.5372	202070000	3	16.6475	16.3437	16.4111	15.9835	15.7128	15.8487	15.4002	16.0603	15.7362	16.0389	15.2521	14.9718	15.0306	14.8195	15.0633	15.0779	15.1372	15.6611	14.8518	15.1587
Q6LZQ6	+	3.16988	0.672432		0.504112	-0.256291		HTH cro/C1-type domain-containing protein OS=Methanococcus maripaludis (strain S2 / LL) OX=267377 GN=MMP0568 PE=4 SV=1								4	4	4	32.4	32.4	32.4	19.317	0	27.231	381590000	8	18.1307	17.9099	18.2781	17.3035	17.7126	17.4988	17.304	17.4192	17.3648	17.7184	18.2303	17.9144	17.3547	18.2941	17.9325	17.6669	18.4642	18.0998	18.079	18.0753
Q6LYN1	+	3.62066	0.653818		0.598561	0.151644		Pyr_redox_2 domain-containing protein OS=Methanococcus maripaludis (strain S2 / LL) OX=267377 GN=trxB PE=4 SV=1								5	5	5	23.7	23.7	23.7	32.746	0	52.121	283180000	7	17.2427	17.2064	17.0825	16.5302	16.4356	16.3193	16.5349	16.7743	16.5459	16.7059	17.8541	17.8441	17.5327	17.4379	17.7901	17.4116	17.5681	17.7962	17.5479	17.6746
Q6LY27	+	1.93371	0.650492		1.17605	-0.269286		FMN_red domain-containing protein OS=Methanococcus maripaludis (strain S2 / LL) OX=267377 GN=MMP1166 PE=4 SV=1								4	4	4	19.3	19.3	19.3	22.003	0	9.8813	406530000	7	18.503	17.5351	17.8524	17.2195	17.3701	17.3343	17.2118	17.3634	17.3789	17.6221	16.9596	17.0157	16.9294	17.0588	17.5369	17.1154	17.014	17.3567	17.3434	17.0482
Q6M042	+	4.31765	0.643656		0.35712	0.110211		Uncharacterized protein OS=Methanococcus maripaludis (strain S2 / LL) OX=267377 GN=MMP0429 PE=4 SV=1								3	3	3	22.7	22.7	22.7	10.847	0	8.3899	890400000	7	18.0654	18.0357	17.9194	17.3463	17.4059	17.5446	17.2017	17.3285	17.352	17.6497	17.6864	18.2507	18.015	17.8567	17.9597	18.0491	17.8205	17.9068	17.65	17.837
Q6LY30	+	2.01297	0.637785		0.0386603	0.0596291		CutA1 divalent ion tolerance protein Related Protein OS=Methanococcus maripaludis (strain S2 / LL) OX=267377 GN=MMP1163 PE=4 SV=1								4	4	4	51.9	51.9	51.9	12.057	0	23.354	454760000	10	16.9041	16.6143	16.7345	15.7109	15.8683	16.158	16.1039	16.4728	16.3653	16.4572	19.0815	18.2315	17.1922	17.613	18.2924	17.2123	18.1195	19.1862	18.2292	18.2886
Q6M033	+	3.63899	0.636584		0.24104	0.0365022		Dihydroorotate dehydrogenase OS=Methanococcus maripaludis (strain S2 / LL) OX=267377 GN=pyrD PE=3 SV=1								4	4	4	13.2	13.2	13.2	31.984	0	10.794	152030000	6	17.7742	17.4446	17.8198	16.9615	17.1414	17.1458	16.9682	16.9925	17.0484	17.339	16.9451	16.7295	17.0079	16.8175	16.8831	16.9411	16.8342	16.8463	16.8239	16.91
Q6M0G0	+	1.40246	0.625346		0.898019	0.202479		Conserved hypothetical archaeal protein OS=Methanococcus maripaludis (strain S2 / LL) OX=267377 GN=MMP0311 PE=4 SV=1								3	3	3	28.3	28.3	28.3	14.035	0	12.762	264110000	5	16.4368	16.0376	15.6663	15.6951	15.3762	14.8337	15.3428	15.5033	15.7782	15.7508	16.9347	16.9131	16.5075	16.5006	16.5835	16.4308	16.6176	16.7922	16.5708	16.5316
Q6M187	+	2.67552	0.623857		0.392772	0.162366		MCM domain-containing protein OS=Methanococcus maripaludis (strain S2 / LL) OX=267377 GN=MMP0030 PE=3 SV=1								12	12	12	17.4	17.4	17.4	75.633	0	34.734	429530000	17	18.5301	18.6472	18.8851	17.9664	18.0022	18.3078	17.7888	18.2323	18.0841	18.3479	18.269	18.2897	18.4399	17.7106	18.274	17.9965	18.0859	18.4361	18.5199	18.2352
Q6LYS5	+	0.947835	0.61861		0.808564	0.340233		Conserved hypothetical archaeal protein OS=Methanococcus maripaludis (strain S2 / LL) OX=267377 GN=MMP0913 PE=4 SV=1								1	1	1	13.6	13.6	13.6	13.458	0	8.2975	159720000	2	16.5577	16.4317	16.6049	15.8138	15.9429	16.8929	15.4157	16.0997	15.312	16.2519	16.5812	16.3513	15.7487	15.7634	16.0404	15.5761	15.9188	16.2373	15.785	16.0765
Q6LY10	+	0.86393	0.616096		1.85148	0.995849		ABC transporter domain-containing protein OS=Methanococcus maripaludis (strain S2 / LL) OX=267377 GN=MMP1183 PE=4 SV=1								4	4	4	18.2	18.2	18.2	28.492	0	10.755	83289000	4	16.2822	15.6437	16.0532	14.5052	15.2918	15.1169	15.9803	16.0618	15.3055	15.7262	17.4181	16.3675	16.8421	15.7928	15.9008	15.6589	16.5456	15.9996	15.3826	16.1754
Q6LXB0	+	3.89883	0.61469		0.0133634	-0.00565147		HTH arsR-type domain-containing protein OS=Methanococcus maripaludis (strain S2 / LL) OX=267377 GN=MMP1442 PE=4 SV=1								4	4	4	36.8	36.8	36.8	11.033	0	14.405	347460000	5	18.6187	18.3579	18.4079	17.9118	17.9392	17.7428	17.7112	17.9508	17.8252	18.0419	16.6555	16.4309	16.3232	16.6604	16.5485	16.2209	16.762	16.2938	16.3676	16.4519
Q6LY39	+	1.41317	0.612379		0.462529	0.280188		H(2)/formate:CoB-CoM heterodisulfide,ferredoxin reductase subunit C1 OS=Methanococcus maripaludis (strain S2 / LL) OX=267377 GN=hdrC1 PE=1 SV=1								8	8	8	43.8	43.8	43.8	21.6	0	44.725	3042000000	19	20.8005	20.5956	20.545	19.5048	19.8848	20.4149	19.7569	20.5296	20.1169	20.2619	21.0465	20.8215	19.9963	19.9784	20.5003	20.1487	20.1663	20.8158	20.4379	20.5073
Q6LZQ5	+	0.969463	0.612207		2.02475	0.312486		Uncharacterized protein OS=Methanococcus maripaludis (strain S2 / LL) OX=267377 GN=MMP0569 PE=4 SV=1								3	3	3	7.8	7.8	7.8	57.206	0	8.8044	26774000	3	13.0916	13.1403	13.5256	12.1214	12.836	13.5121	12.0578	12.5622	12.7522	12.8849	14.9513	14.9429	14.9121	14.4551	14.5138	14.742	14.5032	14.7838	14.7397	15.0109
Q6LWL3	+	1.22924	0.606844		0.0743293	-0.073005		F420-non-reducing hydrogenase vhu iron-sulfur subunit D OS=Methanococcus maripaludis (strain S2 / LL) OX=267377 GN=vhuD PE=3 SV=2								3	3	3	24.6	24.6	24.6	14.658	0	10.928	1385300000	7	19.2071	19.2338	18.9023	18.5374	19.2294	18.7099	18.1106	18.4197	18.0383	18.7181	17.3219	17.502	17.7437	17.6413	17.358	16.723	18.4263	17.9695	17.455	17.5878
Q6M0J9	+	0.963455	0.604241		2.98838	-0.598173		cobW domain-containing protein OS=Methanococcus maripaludis (strain S2 / LL) OX=267377 GN=MMP0271 PE=4 SV=1								2	2	2	8.6	8.6	8.6	25.424	0	4.4739	161870000	3	15.1731	14.4056	14.8181	14.233	14.5877	13.4357	14.763	14.3346	13.8143	14.4921	15.1816	15.2955	15.263	15.8135	15.828	15.682	16.1862	15.8611	15.6985	15.5194
Q6LZK1	+	3.18525	0.604102		0.309856	-0.15252		Cytidylate kinase OS=Methanococcus maripaludis (strain S2 / LL) OX=267377 GN=cmk PE=3 SV=1								5	5	5	44.4	44.4	44.4	20.212	0	28.347	214930000	8	16.6632	16.358	16.7739	15.8676	16.129	16.0805	15.8757	16.04	15.9729	16.8878	16.5317	16.826	16.9165	16.9414	16.4366	17.3389	16.928	17.1576	16.661	18.0402
Q6LX49	+	3.47196	0.603866		1.05454	0.401552		Conserved archaeal protein, pyruvate oxidoreductase-associated OS=Methanococcus maripaludis (strain S2 / LL) OX=267377 GN=porE PE=4 SV=1								3	3	3	15.6	15.6	15.6	18.065	0	6.0407	410030000	4	16.534	16.6246	16.613	16.1943	15.9199	15.7333	16.0276	16.0092	16.0357	16.2942	16.8226	17.6428	17.6212	17.0154	16.7204	16.9011	17.0529	17.2021	16.8719	17.1355
Q6M0G5	+	1.72291	0.600233		0.494868	0.253348		Oxidoreductase family member subunit alpha OS=Methanococcus maripaludis (strain S2 / LL) OX=267377 GN=MMP0306 PE=4 SV=1								6	6	6	14.7	14.7	14.7	63.31	0	28.607	207790000	8	17.1523	16.9534	16.9065	16.066	16.2755	16.8334	16.1201	16.7455	16.3826	16.6389	17.7918	17.6629	16.9548	17.0856	17.3345	16.9369	16.9919	17.681	17.2692	17.3046
Q6LZS7	+	2.1087	0.595843		0.495694	0.344536		Protein MMP0546 OS=Methanococcus maripaludis (strain S2 / LL) OX=267377 GN=MMP0546 PE=3 SV=1								2	2	2	14.8	14.8	14.8	22.912	0	11.658	155010000	4	16.5748	16.5968	16.5103	15.894	15.971	16.124	15.5378	16.3473	15.9145	16.2979	17.4545	16.803	16.3151	16.2013	16.6753	16.1114	16.369	17.2113	16.5097	16.6549
Q6LX47	+	3.09041	0.58588		0.872715	0.411066		Pyruvate oxidoreductase (Synthase) subunit alpha OS=Methanococcus maripaludis (strain S2 / LL) OX=267377 GN=porA PE=4 SV=1								20	20	20	65.4	65.4	65.4	42.248	0	150.5	11316000000	64	21.6143	21.8781	22.03	21.2973	21.3251	21.0605	21.3123	21.3577	21.1767	21.4819	21.168	22.302	22.1145	21.4475	21.2799	21.5557	21.4201	21.6398	21.3598	21.5805
Q6LXL8	+	1.66837	0.585459		0.542288	0.508369		Pyr_redox_2 domain-containing protein OS=Methanococcus maripaludis (strain S2 / LL) OX=267377 GN=MMP1332 PE=4 SV=1								5	5	5	19.8	19.8	19.8	43.811	0	17.246	313430000	6	17.5069	17.2932	17.6701	16.6192	16.9155	17.3952	16.5451	17.0734	16.8794	17.109	17.7627	17.5706	16.1769	16.4156	16.9688	15.8066	16.7288	17.2126	16.838	16.9407
Q6LXU7	+	3.10247	0.585025		0.219921	0.0527379		6-pyruvoyl tetrahydropterin synthase OS=Methanococcus maripaludis (strain S2 / LL) OX=267377 GN=MMP1250 PE=4 SV=1								4	4	4	42.5	42.5	42.5	19.077	0	43.988	523720000	6	18.3902	18.3087	18.4354	17.8728	17.6549	18.0333	17.5546	17.7967	17.8463	18.0766	17.5439	17.5678	17.5524	17.2883	17.6543	17.476	17.3335	17.6377	17.6222	17.5846
P61782	+	3.64751	0.580818		0.688165	-0.235077		Imidazole glycerol phosphate synthase subunit HisH 1 OS=Methanococcus maripaludis (strain S2 / LL) OX=267377 GN=hisH1 PE=3 SV=1								4	4	4	21.2	21.2	21.2	22.676	0	10.751	554630000	6	18.0999	18.1894	18.1337	17.4134	17.6701	17.5647	17.3884	17.7339	17.5906	17.7111	17.6979	17.3577	17.0543	17.4346	17.892	17.3725	17.5318	17.6881	17.7112	17.5173
Q6LWU8	+	1.57355	0.580231		0.326119	-0.0477397		Flavoprotein:DNA/pantothenate metabolism flavoprotein OS=Methanococcus maripaludis (strain S2 / LL) OX=267377 GN=MMP1606 PE=4 SV=1								6	6	6	18.7	18.7	18.7	44.125	0	18.362	214810000	11	18.3296	17.5833	17.9393	17.5104	17.5498	17.6748	17.0046	17.3223	17.161	17.577	17.4555	17.3019	17.3556	17.3468	17.3829	17.335	17.5282	17.5441	17.3753	17.4016
Q6LYE0	+	2.42976	0.579632		0.185299	0.0547934		5-nucleotidase SurE OS=Methanococcus maripaludis (strain S2 / LL) OX=267377 GN=surE PE=3 SV=2								2	2	2	9.2	9.2	9.2	28.98	0	8.0257	173440000	4	17.1111	17.042	16.8877	16.2316	16.5732	16.675	16.1292	16.5776	16.4172	16.6171	15.2975	15.8336	15.4013	15.5005	15.4923	15.4136	15.324	15.5324	15.4733	15.5323
Q6M098	+	1.83571	0.57766		0.386564	-0.221824		Uncharacterized protein OS=Methanococcus maripaludis (strain S2 / LL) OX=267377 GN=MMP0373 PE=4 SV=1								5	5	5	39	39	39	9.3416	0	36.778	2217100000	12	18.9384	18.7469	18.7508	17.7764	18.0844	18.5976	18.4782	18.2685	18.2014	18.4302	19.314	19.253	18.4877	18.8588	19.4592	18.9761	19.0637	19.5486	19.5341	19.1976
P61820	+	1.20226	0.575099		0.286821	0.144431		Probable cobalt-precorrin-6B C(15)-methyltransferase (decarboxylating) OS=Methanococcus maripaludis (strain S2 / LL) OX=267377 GN=cbiT PE=3 SV=1								1	1	1	6.6	6.6	6.6	20.166	0.0010753	3.7791	27430000	2	13.7319	13.4628	13.6159	12.7547	13.2185	13.8158	12.7228	12.7672	12.8916	13.3578	14.1287	13.6729	13.8453	14.0967	13.6139	13.7488	14.1396	13.4639	13.3642	13.7169
Q6LZF1	+	1.61454	0.57491		0.386968	0.16203		Putative HTH-type transcriptional regulatory protein MMP0678 OS=Methanococcus maripaludis (strain S2 / LL) OX=267377 GN=MMP0678 PE=3 SV=2								3	3	3	19.9	19.9	19.9	37.06	0	10.953	26423000	4	13.4556	12.8553	13.0967	12.3865	12.5654	12.5118	12.5195	13.0877	12.295	13.0485	15.5188	15.7942	16.1014	15.4941	15.7046	16.048	15.3888	15.7729	15.4483	15.7016
Q6LWV3	+	0.89649	0.572918		0.286245	-0.0471363		Putative RNA methylase OS=Methanococcus maripaludis (strain S2 / LL) OX=267377 GN=MMP1601 PE=4 SV=1								2	2	2	14.2	14.2	14.2	29.074	0	5.9292	216610000	4	18.1925	17.1963	16.77	16.6191	16.6795	16.8909	16.4025	17.0514	17.2366	17.4581	16.2408	16.4012	16.433	16.4226	16.3321	16.5439	16.2667	16.4355	16.4321	16.3683
Q6LZ30;Q6LZ38	+	3.78047	0.568859		1.25717	0.243743		HTH tetR-type domain-containing protein OS=Methanococcus maripaludis (strain S2 / LL) OX=267377 GN=MMP0799 PE=4 SV=1;HTH tetR-type domain-containing protein OS=Methanococcus maripaludis (strain S2 / LL) OX=267377 GN=MMP0791 PE=4 SV=1								2	2	2	7.8	7.8	7.8	22.169	0.0010764	3.7947	20611000	2	15.2926	15.375	15.5116	14.9691	14.9009	14.8888	14.7011	14.715	14.7704	15.0223	15.3972	15.3499	15.743	15.1583	15.2244	15.4718	15.2648	15.2319	15.1667	15.249
Q6LWM5	+	1.14894	0.565903		0.144678	0.0526613		Metallophos domain-containing protein OS=Methanococcus maripaludis (strain S2 / LL) OX=267377 GN=MMP1684 PE=4 SV=1								4	4	4	22.9	22.9	22.9	25.803	0	15.816	111090000	6	16.4627	16.8402	17.3924	16.1147	16.5709	16.8427	15.9354	16.3716	16.1598	16.6134	16.769	16.5337	16.3656	16.4252	16.4706	16.1668	16.6745	16.6706	16.6127	16.5199
Q6LWY7	+	2.60517	0.564266		1.96192	0.301675		Tetrahydromethanopterin S-methyltransferase subunit H OS=Methanococcus maripaludis (strain S2 / LL) OX=267377 GN=mtrH PE=3 SV=1								14	14	14	44.5	44.5	44.5	34.348	0	60.195	34342000000	52	23.2011	23.492	23.4726	22.942	22.8222	22.4726	22.9156	22.8713	22.9221	23.0451	22.9115	22.6373	22.7232	22.4771	22.4652	22.5967	22.4027	22.5346	22.2577	22.6052
Q6LXT7	+	2.18717	0.563074		0.180142	0.152966		Conserved hypothetical Archael protein OS=Methanococcus maripaludis (strain S2 / LL) OX=267377 GN=MMP1260 PE=4 SV=1								7	7	7	29.6	29.6	29.6	41.474	0	34.987	1112500000	21	19.349	18.9108	19.3157	18.7564	18.6461	18.3007	18.5216	18.7167	18.8311	18.95	17.9841	18.244	19.1994	17.8355	18.264	18.9897	18.1792	18.2069	18.4617	18.4306
Q6M156	+	1.32972	0.562592		0.0360039	0.022596		Translation initiation factor 6 OS=Methanococcus maripaludis (strain S2 / LL) OX=267377 GN=eif6 PE=3 SV=1								2	2	2	10.6	10.6	10.6	24.595	0	14.554	133340000	4	17.4153	16.9119	17.6615	16.3823	16.964	16.8616	17.1839	16.7619	16.4481	16.9871	17.0337	17.6944	17.9463	17.3965	17.4757	17.8494	17.3193	17.4292	17.7432	17.5651
Q6LYS1	+	1.777	0.561059		1.78871	-0.49563		Diaminopimelate epimerase OS=Methanococcus maripaludis (strain S2 / LL) OX=267377 GN=dapF PE=3 SV=1								9	9	9	33.6	33.6	33.6	30.834	0	31.205	1899100000	23	20.2687	20.3914	20.8132	19.9497	20.043	19.5146	19.9549	20.2439	19.8744	20.1422	19.5396	19.3683	19.7081	19.8693	20.085	20.2961	20.0261	19.663	20.2661	19.8876
Q6LX46	+	4.28063	0.559281		0.6296	0.424374		Pyruvate oxidoreductase (Synthase) subunit delta OS=Methanococcus maripaludis (strain S2 / LL) OX=267377 GN=porD PE=4 SV=1								2	2	2	31.8	31.8	31.8	9.6821	0	89.342	452860000	4	17.9976	18.0617	18.1689	17.5766	17.6546	17.4142	17.4888	17.5403	17.4263	17.7935	13.5139	15.0048	14.1273	13.9373	13.6732	13.5129	13.7951	14.2493	13.5782	13.9941
Q6M0C7	+	3.79658	0.55835		0.0558151	-0.0399434		Conserved hypothetical archaeal protein OS=Methanococcus maripaludis (strain S2 / LL) OX=267377 GN=MMP0344 PE=4 SV=1								5	5	5	19.1	19.1	19.1	33.425	0	18.721	417910000	7	17.8099	17.7302	17.8349	17.2733	17.2635	17.2565	17.0086	17.2174	17.3805	17.4455	16.8156	17.0271	17.2561	16.5672	17.4214	16.8933	16.7012	17.3707	17.4835	17.0404
Q6LXC6	+	1.25064	0.547504		0.283865	-0.0537437		dCTP deaminase, dUMP-forming OS=Methanococcus maripaludis (strain S2 / LL) OX=267377 GN=dcd PE=3 SV=1								3	3	3	17.5	17.5	17.5	23.387	0	8.8478	74970000	3	14.3967	13.4406	13.9457	13.5145	13.7993	13.3243	13.4238	13.1239	13.0954	13.7108	16.0866	16.1913	16.1201	16.2857	16.0431	16.2276	16.3685	16.0721	16.1215	16.239
Q6LZX3	+	1.5654	0.546786		0.197232	-0.102035		FMN_red domain-containing protein OS=Methanococcus maripaludis (strain S2 / LL) OX=267377 GN=MMP0500 PE=4 SV=1								4	4	4	31.1	31.1	31.1	19.982	0	29.061	897190000	10	18.412	18.0668	18.5637	17.7166	17.8844	18.3062	17.4452	17.6822	17.7697	18.0895	16.2871	16.2428	16.4281	16.0959	16.7179	16.9024	16.167	16.1438	16.5013	16.3029
Q6LYF8	+	1.95405	0.545636		1.95943	0.233358		Uncharacterized protein OS=Methanococcus maripaludis (strain S2 / LL) OX=267377 GN=MMP1033 PE=4 SV=1								32	32	32	41.9	41.9	41.9	112.97	0	118.32	3298400000	49	21.1809	21.0227	20.8903	20.3761	20.5788	20.9546	20.3404	20.3814	20.2827	20.6806	19.7939	19.6763	19.6462	19.532	19.5375	19.378	19.6033	19.4436	19.3385	19.5022
Q6LY38	+	1.6143	0.541167		0.392675	0.309402		H(2)/formate:CoB-CoM heterodisulfide,ferredoxin reductase subunit B1 OS=Methanococcus maripaludis (strain S2 / LL) OX=267377 GN=hdrB1 PE=1 SV=1								8	8	8	29.6	29.6	29.6	33.509	0	27.699	2887700000	16	21.6555	21.3072	21.324	20.4483	20.7759	21.2504	20.736	21.1115	21.0041	21.1065	21.6328	21.2873	20.3115	20.5372	21.0258	20.2062	20.7152	21.3414	20.781	20.8998
Q6LWZ7	+	2.80895	0.537106		0.0894828	0.0254221		Methyl-coenzyme M reductase operon protein C OS=Methanococcus maripaludis (strain S2 / LL) OX=267377 GN=mcrC PE=4 SV=1								5	5	5	21.2	21.2	21.2	21.354	0	14.419	489920000	7	16.7497	16.8044	16.5809	16.1427	16.1918	15.8961	16.1659	16.3943	16.2566	16.3812	17.7005	17.2413	17.3983	17.4177	17.551	17.3916	17.4534	17.4446	17.2696	17.4392
Q6M0S5	+	1.65893	0.532427		0.355282	0.24554		DUF2202 domain-containing protein OS=Methanococcus maripaludis (strain S2 / LL) OX=267377 GN=MMP0194 PE=4 SV=1								2	2	2	16.2	16.2	16.2	30.938	0	6.3731	79748000	3	15.1155	14.7863	14.5707	14.3609	13.9637	14.4524	13.9908	14.5257	14.4568	14.568	16.0961	15.7709	14.8974	15.0496	15.6258	15.1253	15.0167	15.7335	15.5045	15.3037
Q6LZ93	+	1.8382	0.531735		0.367715	0.113125		PRC domain-containing protein OS=Methanococcus maripaludis (strain S2 / LL) OX=267377 GN=MMP0736 PE=4 SV=1								4	4	4	34.5	34.5	34.5	9.0556	0	13.398	1291000000	9	19.5771	19.2953	19.9403	18.9002	19.1372	19.4103	19.0434	18.9408	19.0029	19.2881	19.2381	19.427	18.9907	19.0626	19.047	18.8121	19.3043	19.268	19.1389	19.1991
Q6LYQ7	+	1.65025	0.52414		0.0338236	0.0336847		CheC domain-containing protein OS=Methanococcus maripaludis (strain S2 / LL) OX=267377 GN=MMP0931 PE=4 SV=1								2	2	2	13.9	13.9	13.9	22.622	0	12.139	178130000	6	16.6217	16.0191	16.1299	15.8968	15.7339	16.0009	15.7757	15.6206	15.3688	15.9304	17.8174	16.4739	16.8617	17.3849	16.9943	16.5294	17.4835	17.0458	16.6659	17.0202
Q6LX92	+	2.13126	0.519507		0.517413	0.214225		Uncharacterized protein OS=Methanococcus maripaludis (strain S2 / LL) OX=267377 GN=ehaM PE=4 SV=1								2	2	2	17.6	17.6	17.6	15.614	0	7.3628	82523000	3	16.479	16.271	16.3802	15.8546	15.5311	15.6922	15.9653	16.174	15.9262	16.0558	16.6721	16.4284	16.2934	16.0966	16.5716	16.678	16.1354	16.081	15.9396	16.2668
Q6LZI3	+	0.921834	0.513098		0.886589	0.285457		Malate dehydrogenase OS=Methanococcus maripaludis (strain S2 / LL) OX=267377 GN=mdh PE=3 SV=1								11	11	11	37.9	37.9	37.9	34.468	0	29.524	812340000	14	19.6058	18.8249	20.1976	18.8712	19.2734	19.3308	18.8778	18.9221	18.9027	19.3036	18.3379	18.9348	18.8454	18.4814	18.3833	18.7447	18.4426	18.2118	18.2599	18.458
Q6LX45	+	2.81862	0.510998		0.994699	0.412515		POR domain-containing protein OS=Methanococcus maripaludis (strain S2 / LL) OX=267377 GN=porC PE=4 SV=1								6	6	6	43.8	43.8	43.8	18.942	0	33.715	2634400000	16	19.4788	19.5334	19.8978	19.1694	19.2177	19.0433	19.2301	19.0344	19.059	19.2174	19.5987	20.5662	20.4554	19.7927	19.5251	19.8537	19.8316	19.9714	19.791	19.9551
Q6LXP3	+	1.81735	0.507239		0.193237	-0.135348		Uncharacterized protein OS=Methanococcus maripaludis (strain S2 / LL) OX=267377 GN=MMP1306 PE=4 SV=1								4	4	4	28.1	28.1	28.1	28.057	0	34.305	280880000	4	15.9695	15.6448	15.9885	15.4467	15.511	14.9937	15.5553	15.5202	15.1352	15.5874	14.1775	14.7529	15.2741	15.3263	14.5449	15.0033	15.0218	14.5265	14.7984	14.8812
Q6LX75	+	1.58233	0.506427		1.396	0.187203		CbiA domain-containing protein OS=Methanococcus maripaludis (strain S2 / LL) OX=267377 GN=cbiA PE=4 SV=1								2	2	2	27.5	27.5	27.5	14.69	0	12.22	186000000	5	16.1068	16.2575	16.5864	15.7337	15.9478	15.3518	15.7731	16.0689	15.9873	15.983	17.2673	17.4433	17.5215	17.1684	17.4031	17.2185	17.23	17.1453	17.1758	17.1982
Q6M085	+	3.33412	0.505013		0.352682	-0.143398		CBFD_NFYB_HMF domain-containing protein OS=Methanococcus maripaludis (strain S2 / LL) OX=267377 GN=HMmA PE=4 SV=1								5	5	5	59.7	59.7	59.7	7.2936	0	19.677	56062000000	47	23.4485	23.6626	23.7816	23.1434	23.0645	23.2318	22.9893	23.1777	23.1487	23.2733	23.7098	23.7444	23.2205	23.8958	23.9658	23.351	23.6646	23.541	23.7916	23.6936
Q6LYK9	+	0.867009	0.502703		0.267041	-0.163456		CbiA domain-containing protein OS=Methanococcus maripaludis (strain S2 / LL) OX=267377 GN=MMP0982 PE=4 SV=1								9	9	9	41.6	41.6	41.6	27.6	0	38.359	853090000	13	19.2749	19.6	20.0824	19.0902	19.3811	19.7537	18.4533	19.0566	19.1634	19.427	17.9529	19.0291	18.954	18.9523	18.5527	18.96	18.96	18.8419	18.586	18.8238
Q6M0Z1	+	1.065	0.497473		0.939704	0.2451		5,10-methenyltetrahydromethanopterin hydrogenase OS=Methanococcus maripaludis (strain S2 / LL) OX=267377 GN=hmd PE=3 SV=1								14	14	14	42.1	42.1	42.1	37.868	0	78.869	35417000000	87	24.4621	23.7745	24.4374	23.5812	23.9049	24.3232	23.4437	23.6486	23.4616	23.9456	23.1661	23.0429	22.6986	22.7264	22.6443	22.5255	22.8272	22.6226	22.9987	22.8068
P61730	+	1.12482	0.491274		1.26188	-0.655814		6,7-dimethyl-8-ribityllumazine synthase OS=Methanococcus maripaludis (strain S2 / LL) OX=267377 GN=ribH PE=3 SV=1								8	8	8	67.9	67.9	67.9	15.062	0	30.318	2105900000	18	19.9729	19.7759	19.8545	19.4211	19.5301	19.3804	18.8435	19.1004	19.9834	19.6371	19.9381	19.1105	19.2682	19.9025	19.7629	20.0613	20.8316	19.8609	20.1492	19.9648
Q6LYM6	+	1.3466	0.484711		0.388313	-0.129777		Uncharacterized protein OS=Methanococcus maripaludis (strain S2 / LL) OX=267377 GN=MMP0964 PE=4 SV=1								2	2	2	22.4	22.4	22.4	10.005	0	5.9879	187700000	3	16.1275	16.6254	15.9536	15.9397	15.6529	15.3462	15.6965	16.0603	15.8092	15.9067	15.8463	16.0984	15.9281	16.3263	16.2022	16.2634	16.0463	15.6845	16.0015	15.933
Q6LX05	+	2.57901	0.482183		0.559913	-0.26379		AP_endonuc_2 domain-containing protein OS=Methanococcus maripaludis (strain S2 / LL) OX=267377 GN=MMP1549 PE=4 SV=1								4	4	4	20.5	20.5	20.5	30.114	0	21.993	590490000	8	17.0846	16.9529	17.028	16.4762	16.4696	16.6181	16.2872	16.5875	16.7993	16.7877	17.3553	17.0744	16.5588	17.198	17.3087	16.7419	17.4662	17.4201	17.4249	17.1778
Q6LWL9	+	2.10012	0.468975		0.280813	-0.1113		Similar to phosphoribosylformimino-5-aminoimidazole carboxamide ribotide isomerase OS=Methanococcus maripaludis (strain S2 / LL) OX=267377 GN=MMP1690 PE=3 SV=1								2	2	2	13.5	13.5	13.5	24.562	0	4.7239	156530000	3	13.8162	13.6268	13.6772	12.9679	13.1901	13.5202	13.2161	13.4276	13.1046	13.5381	15.4325	15.756	15.1899	15.3275	15.5409	15.6456	15.3367	15.858	15.7161	15.5271
Q6M0U1	+	2.29535	0.46528		0.173114	-0.125869		Conserved hypothetical archaeal protein OS=Methanococcus maripaludis (strain S2 / LL) OX=267377 GN=MMP0177 PE=4 SV=1								4	4	4	35.3	35.3	35.3	13.91	0	20.345	821910000	6	18.5952	18.6773	18.646	18.0831	17.9529	18.0428	18.1511	18.4015	18.4139	18.3062	18.0015	17.75	17.0817	17.3821	18.0738	17.3459	17.4807	18.0713	18.0677	17.7014
Q6M0N5	+	1.3003	0.460901		0.321385	-0.352256		Uncharacterized protein OS=Methanococcus maripaludis (strain S2 / LL) OX=267377 GN=MMP0235 PE=4 SV=1								4	4	4	17.2	17.2	17.2	34.06	0	21.121	230920000	7	16.7182	16.7172	17.2297	16.2387	16.5708	16.8703	16.1578	16.4742	16.2529	16.6941	17.2825	15.5095	15.9521	16.0141	16.509	16.1898	16.423	17.3431	17.1227	16.7602
Q6M181	+	1.69209	0.455184		0.744668	-0.426758		Transcription factor E OS=Methanococcus maripaludis (strain S2 / LL) OX=267377 GN=tfe PE=3 SV=2								2	2	2	19.4	19.4	19.4	20.869	0	5.4205	100540000	2	17.419	17.503	17.035	16.6774	16.7602	16.6667	16.8869	17.0324	17.1593	17.0291	16.5962	15.3654	15.5461	15.95	16.4417	16.144	16.0891	16.4498	16.5016	16.09
Q6M1B2	+	1.12757	0.451819		0.0485039	0.0135522		RIO domain-containing protein OS=Methanococcus maripaludis (strain S2 / LL) OX=267377 GN=MMP0004 PE=4 SV=1								1	1	1	4.4	4.4	4.4	35.135	0.0070707	2.6688	25207000	2	14.9336	15.1713	15.1688	14.4428	14.9879	15.1342	14.2217	14.4579	14.5921	15.1611	14.8984	14.8663	14.9481	14.8794	14.7811	14.8263	15.0791	14.6887	15.0896	14.8945
O59648	+	1.97172	0.445191		0.532945	-0.141672		Glutamine synthetase OS=Methanococcus maripaludis (strain S2 / LL) OX=267377 GN=glnA PE=3 SV=1								23	23	23	52.2	52.2	52.2	49.421	0	125.34	21746000000	68	23.4056	23.211	23.5237	22.9447	23.1853	23.1404	22.8153	22.8056	22.718	23.1011	22.1706	22.3608	21.9298	22.4542	22.1502	22.2923	22.5102	22.2392	22.1264	22.2668
Q6LZC7	+	3.10128	0.444086		0.072762	0.0160068		Tetrahydromethanopterin:alpha-L-glutamate ligase OS=Methanococcus maripaludis (strain S2 / LL) OX=267377 GN=mptN PE=3 SV=1								8	8	8	34.9	34.9	34.9	33.016	0	51.308	1189200000	13	18.857	18.9463	18.9865	18.6954	18.4907	18.4461	18.325	18.4203	18.5374	18.7092	17.9317	18.2046	18.196	18.2467	18.0785	18.0262	18.1473	18.0042	18.0658	18.109
Q6LWZ1	+	1.81842	0.442436		1.1204	0.23425		Tetrahydromethanopterin S-methyltransferase subunit B OS=Methanococcus maripaludis (strain S2 / LL) OX=267377 GN=mtrB PE=3 SV=1								3	3	3	24.1	24.1	24.1	12.027	0	13.031	8068100000	9	19.4987	19.7201	19.6706	19.2197	19.1396	18.7815	19.3504	19.3991	19.2339	19.3204	20.8942	20.7078	20.6686	20.3882	20.6498	20.7711	20.3165	20.5722	20.438	20.5778
Q6LXW2	+	2.75813	0.441438		0.730709	0.205867		ThiF domain-containing protein OS=Methanococcus maripaludis (strain S2 / LL) OX=267377 GN=MMP1234 PE=4 SV=1								1	1	1	5.9	5.9	5.9	26.596	0	5.2645	33071000	2	15.0277	15.132	14.9914	14.6808	14.5876	14.7824	14.3512	14.6313	14.6203	14.7422	13.8531	14.3977	14.0749	13.6576	13.8622	13.8602	13.9099	13.9894	14.1367	13.5907
Q6M0G9	+	2.35958	0.439997		0.0191157	-0.00436179		Uncharacterized protein OS=Methanococcus maripaludis (strain S2 / LL) OX=267377 GN=MMP0302 PE=4 SV=1								4	4	4	46.2	46.2	46.2	13.907	0	11.546	579040000	5	18.3096	18.186	18.1936	17.7279	17.6838	18.0809	17.5778	17.8239	17.8439	17.9644	16.0251	16.0564	16.0695	15.9192	16.0912	15.9006	16.0313	16.1631	16.2229	15.9909
Q6LXW1	+	1.19811	0.439697		1.59377	0.306753		Molybdopterin biosynthesis MoaE OS=Methanococcus maripaludis (strain S2 / LL) OX=267377 GN=moaE PE=4 SV=1								4	4	4	32.6	32.6	32.6	16.197	0	16.114	229530000	7	17.8208	17.4913	17.5951	17.2681	17.1312	17.6561	16.7073	17.0645	17.349	17.4025	16.5017	16.5234	16.3722	16.1642	16.0154	16.1786	16.3803	16.3028	15.9127	16.3727
Q6LX50	+	1.3167	0.432415		1.27053	0.624241		Ferredoxin OS=Methanococcus maripaludis (strain S2 / LL) OX=267377 GN=porF PE=4 SV=1								2	2	1	19.6	19.6	8.7	15.166	0	4.2141	727020000	3	17.5216	17.8003	17.9211	17.627	17.201	16.8495	17.4769	17.4571	17.28	17.3977	17.99	19.3231	18.9865	18.1565	18.0928	18.0892	18.1018	18.3475	18.0659	18.3385
Q6LWV5	+	3.22728	0.43229		0.544364	-0.0728496		Trk system potassium uptake protein A OS=Methanococcus maripaludis (strain S2 / LL) OX=267377 GN=trkA PE=4 SV=1								7	7	7	51.1	51.1	51.1	23.86	0	22.829	502080000	9	18.552	18.4367	18.4436	18.0174	18.1234	18.2382	17.9237	17.9766	17.9914	18.2276	19.1048	19.0359	19.0695	19.012	19.3035	19.0895	19.0952	19.1426	19.2147	19.0886
Q6M190	+	1.88788	0.428315		0.389269	0.132885		Putative potassium channel protein OS=Methanococcus maripaludis (strain S2 / LL) OX=267377 GN=MMP0027 PE=4 SV=1								2	2	1	5.1	5.1	2.7	37.763	0.003096	3.1855	42882000	2	14.1072	14.2232	14.1664	13.5475	13.4224	13.9222	13.8307	13.9599	13.7408	13.8881	14.6665	14.2083	14.0243	14.0141	14.2437	14.0268	14.1143	14.2207	14.3812	14.4454
Q6LYR5	+	2.25719	0.425504		0.181566	0.133802		4-hydroxy-tetrahydrodipicolinate reductase OS=Methanococcus maripaludis (strain S2 / LL) OX=267377 GN=dapB PE=3 SV=1								18	18	18	75.6	75.6	75.6	28.861	0	80.329	8085100000	53	21.7793	21.575	21.413	21.0782	21.1282	21.3911	21.095	21.2656	21.0235	21.3225	21.1108	20.0979	20.0175	20.4411	20.1253	19.8697	20.6071	20.5349	20.0717	20.3196
Q6M0F9	+	2.52392	0.421725		0.541303	-0.10295		Conserved hypothetical archaeal protein OS=Methanococcus maripaludis (strain S2 / LL) OX=267377 GN=MMP0312 PE=4 SV=1								6	6	6	50	50	50	16.287	0	27.439	1263000000	10	18.7508	18.4085	18.656	18.2003	18.0577	18.12	18.0976	18.2747	18.35	18.4052	17.8626	17.6911	17.4855	17.7634	17.7847	17.6513	17.8158	17.928	17.753	17.7257
Q6LWR5	+	1.44246	0.419255		1.41107	0.324291		G domain-containing protein OS=Methanococcus maripaludis (strain S2 / LL) OX=267377 GN=MMP1642 PE=4 SV=1								1	1	1	6	6	6	20.87	0.0070423	2.6444	25466000	2	14.2564	14.1924	14.1085	13.4625	13.771	14.1578	13.6843	13.9903	13.5334	13.9854	14.48	15.0179	14.6822	14.425	14.4934	14.3926	14.1914	14.5607	14.3514	14.2813
Q6LWY9	+	1.64188	0.416964		1.64559	0.352592		Tetrahydromethanopterin S-methyltransferase subunit A OS=Methanococcus maripaludis (strain S2 / LL) OX=267377 GN=or900 PE=3 SV=1								4	4	1	21.3	21.3	3.6	26.134	0	40.729	11275000000	17	19.7462	19.4553	19.4911	19.3327	19.1582	18.7611	19.0975	19.159	19.3748	19.3389	20.5671	20.1982	20.2711	19.9372	20.1984	20.1811	19.8133	19.9547	19.8725	20.0392
Q6LYR9	+	3.07552	0.41619		0.055607	-0.0165914		Probable dihydroorotate dehydrogenase B (NAD(+)), electron transfer subunit OS=Methanococcus maripaludis (strain S2 / LL) OX=267377 GN=pyrK PE=3 SV=1								6	6	6	31.8	31.8	31.8	28.01	0	37.669	305370000	7	17.8859	17.7626	17.6876	17.2547	17.4075	17.2959	17.2542	17.4777	17.4849	17.4937	16.0392	15.6035	16.0361	15.8425	16.0362	15.9659	15.8938	15.8915	15.8273	15.8249
Q6M0Y9	+	2.1262	0.407948		1.3343	-0.458496		POLIIIAc domain-containing protein OS=Methanococcus maripaludis (strain S2 / LL) OX=267377 GN=MMP0129 PE=4 SV=1								5	5	5	40.8	40.8	40.8	24.258	0	21.727	140850000	6	16.2118	16.2006	16.4541	15.7213	15.9334	16.0991	15.6665	15.9184	15.9466	15.9851	14.5417	14.1383	13.7153	14.5663	14.6972	14.2625	14.7439	14.5487	14.723	14.2908
Q6LX48	+	2.57878	0.406761		0.717509	0.340464		TPP_enzyme_C domain-containing protein OS=Methanococcus maripaludis (strain S2 / LL) OX=267377 GN=porB PE=4 SV=1								8	8	8	43.6	43.6	43.6	32.391	0	84.684	1633500000	27	18.5926	18.7793	18.9223	18.3502	18.4386	18.1752	18.4263	18.4554	18.3022	18.4742	18.7403	19.8693	19.6463	19.0136	18.96	19.1849	18.9946	19.2374	19.0785	19.194
Q6M0V1	+	3.01756	0.402536		0.071307	0.00969219		ABC transporter domain-containing protein OS=Methanococcus maripaludis (strain S2 / LL) OX=267377 GN=MMP0167 PE=4 SV=1								9	9	9	41.6	41.6	41.6	36.621	0	41.985	1132600000	13	19.5287	19.443	19.6474	19.0514	19.2052	19.2656	18.9799	19.1364	19.1845	19.3233	19.1644	19.1098	19.0989	19.0304	19.0258	19.2363	19.124	19.1242	19.1473	19.1043
Q6LWY8	+	2.93086	0.402259		0.291511	-0.0891854		Tetrahydromethanopterin S-methyltransferase subunit G OS=Methanococcus maripaludis (strain S2 / LL) OX=267377 GN=mtrG PE=3 SV=1								3	3	3	43.2	43.2	43.2	8.1975	0	29.263	8686100000	9	18.3827	18.4804	18.5602	18.1014	18.1089	17.8881	18.1393	17.9879	18.2076	18.2552	19.0293	18.893	18.5148	18.8141	18.9321	18.9739	18.7027	19.0935	18.893	18.9328
Q6LY26	+	2.39632	0.39118		0.248834	-0.1662		Flavoprotein domain-containing protein OS=Methanococcus maripaludis (strain S2 / LL) OX=267377 GN=MMP1167 PE=4 SV=1								11	11	11	71.2	71.2	71.2	20.686	0	48.352	2010100000	23	19.8683	19.6941	19.7327	19.1538	19.3451	19.5012	19.2776	19.5378	19.4274	19.5981	21.218	20.9764	20.2997	20.8105	21.0825	20.4896	20.9446	21.5267	21.1316	20.9622
Q6LXS3	+	1.92288	0.387794		0.264184	-0.117917		HTH cro/C1-type domain-containing protein OS=Methanococcus maripaludis (strain S2 / LL) OX=267377 GN=MMP1275 PE=4 SV=1								3	3	3	19	19	19	21.223	0	12.804	638370000	7	17.2504	17.4134	17.5932	17.1667	17.1536	17.0392	16.7409	16.9771	17.1094	17.2169	17.3415	17.9998	18.0865	17.916	17.931	18.2596	17.8478	17.7906	17.818	17.8952
Q6LXA6	+	3.36922	0.379531		0.770278	0.316088		Zpr1 domain-containing protein OS=Methanococcus maripaludis (strain S2 / LL) OX=267377 GN=MMP1446 PE=4 SV=1								3	3	3	15.3	15.3	15.3	21.392	0	8.9405	123170000	4	16.946	17.0006	17.1729	16.5655	16.6037	16.6725	16.761	16.6953	16.664	16.9223	16.9628	17.5241	16.8404	16.7376	17.112	16.7939	16.4577	17.0646	16.5923	16.8011
Q6M0C5	+	2.7564	0.378673		0.533187	0.101061		2-hydroxyglutaryl-CoA dehydratase (Component D) related protein OS=Methanococcus maripaludis (strain S2 / LL) OX=267377 GN=MMP0346 PE=4 SV=1								20	20	20	38.9	38.9	38.9	42.319	0	74.88	12426000000	50	21.7594	21.6064	21.3786	21.1605	21.2814	21.1713	21.2275	21.1968	21.1793	21.3108	21.0986	20.9337	20.936	20.9198	20.8144	20.7724	21.1261	20.93	20.7676	20.9105
Q6M137	+	3.30701	-0.364823		1.03194	-0.232882		Archaeal glutamate synthase [NADPH] OS=Methanococcus maripaludis (strain S2 / LL) OX=267377 GN=gltB PE=3 SV=1								21	21	21	47.5	47.5	47.5	55.152	0	126.55	7423900000	43	20.7087	20.8427	20.9212	21.1352	21.254	21.2849	21.2155	21.1461	21.0985	21.0697	20.967	21.154	21.3085	21.4237	21.2114	21.3413	21.4616	21.1831	21.6352	21.3146
Q6LXU9	+	2.30075	-0.377517		0.47514	-0.203759		Molydop_binding domain-containing protein OS=Methanococcus maripaludis (strain S2 / LL) OX=267377 GN=fwdD PE=4 SV=1								6	6	6	70.3	70.3	70.3	14.149	0	37.628	3356400000	15	18.2443	18.1921	18.2165	18.3271	18.6636	18.6362	18.7967	18.6032	18.5439	18.4963	19.5044	19.5347	19.441	20.0537	19.849	19.1711	19.931	19.4616	19.7161	19.7032
Q6LXB3	+	4.09167	-0.377884		2.0938	0.806592		2,3-bisphosphoglycerate-independent phosphoglycerate mutase OS=Methanococcus maripaludis (strain S2 / LL) OX=267377 GN=apgM PE=3 SV=1								21	21	21	43.3	43.3	43.3	44.464	0	68.191	3283800000	33	19.2346	19.2607	19.4335	19.7421	19.645	19.704	19.6866	19.6483	19.699	19.5304	21.2093	22.0228	21.7082	20.7558	20.9073	21.2958	20.598	20.8934	20.5907	21.1203
Q6M0H9	+	2.2472	-0.381087		0.553098	-0.120099		Hydrogenase expression/formation protein related OS=Methanococcus maripaludis (strain S2 / LL) OX=267377 GN=MMP0291 PE=4 SV=1								13	13	13	32.7	32.7	32.7	49.183	0	51.265	936040000	20	18.6323	18.8031	18.5141	18.9498	19.0546	19.1845	18.9104	19.191	18.8952	18.8851	19.5156	19.6411	19.3152	19.8277	19.6015	19.4691	19.7164	19.5276	19.522	19.5259
Q6LX64	+	2.72379	-0.389688		0.968709	-0.103585		Modulator of DNA gyrase OS=Methanococcus maripaludis (strain S2 / LL) OX=267377 GN=MMP1488 PE=4 SV=1								11	11	11	28.6	28.6	28.6	49.755	0	36.426	476600000	15	17.8847	17.7762	17.7748	18.1527	18.2236	18.3649	18.0108	18.317	18.1406	18.1126	17.5807	17.6624	17.5978	17.5798	17.6632	17.8085	17.7096	17.8179	17.7244	17.6701
Q6M0M5	+	2.4103	-0.393585		0.27577	-0.0396452		Prefoldin subunit beta OS=Methanococcus maripaludis (strain S2 / LL) OX=267377 GN=pfdB PE=3 SV=1								11	11	11	85.8	85.8	85.8	13.477	0	45.961	5465700000	24	19.7195	19.8071	19.8789	20.1182	20.1686	20.3486	20.2177	19.9657	20.3536	20.0349	20.2939	20.0767	20.2272	20.1354	20.2441	20.2021	20.2225	20.2844	20.3449	20.1843
Q6LYG9	+	2.51064	-0.39445		0.849351	0.391489		SSD domain-containing protein OS=Methanococcus maripaludis (strain S2 / LL) OX=267377 GN=MMP1022 PE=4 SV=1								1	1	1	2.3	2.3	2.3	42.157	0.005102	2.8447	34053000	2	13.7856	13.9036	13.9575	14.3138	14.4199	14.2331	14.4229	14.2092	14.0613	14.0339	16.345	16.6166	15.9442	15.8372	15.5537	15.5238	16.0998	16.3615	16.0867	15.9004
Q6M0I6	+	2.44096	-0.401019		0.0505268	0.0101582		Probable translation initiation factor IF-2 OS=Methanococcus maripaludis (strain S2 / LL) OX=267377 GN=infB PE=3 SV=1								15	15	15	33.4	33.4	33.4	66.153	0	45.3	691430000	23	17.5089	17.518	17.7168	18.1577	17.9056	17.7689	18.085	17.9558	18.0204	17.904	18.8322	18.8703	19.0774	19.0264	18.9144	18.9622	18.9374	18.8833	18.7753	18.9014
Q6LXC4	+	1.825	-0.402653		0.918733	0.306897		Uncharacterized protein OS=Methanococcus maripaludis (strain S2 / LL) OX=267377 GN=MMP1428 PE=4 SV=1								2	2	2	41.5	41.5	41.5	5.6757	0	7.4468	291400000	4	15.7985	15.9071	16.2993	16.3423	16.3357	16.3108	16.5603	16.5766	16.3001	16.0394	16.4788	17.1252	16.5829	16.459	16.773	16.2479	16.275	16.4253	16.3523	16.4256
Q6LXR0	+	1.64194	-0.408079		0.0955544	-0.0302846		50S ribosomal protein L10e OS=Methanococcus maripaludis (strain S2 / LL) OX=267377 GN=rpl10e PE=3 SV=1								7	7	7	39.3	39.3	39.3	19.372	0	25.866	3292100000	17	18.8461	18.7377	18.3853	19.1604	19.2209	18.7319	19.178	19.0134	19.0822	18.9362	19.8662	19.7464	20.2148	20.0379	19.8703	20.1843	19.9412	19.8778	19.9248	19.9706
Q6LXZ7	+	2.22933	-0.408834		0.115016	-0.0833238		Uncharacterized protein OS=Methanococcus maripaludis (strain S2 / LL) OX=267377 GN=MMP1196 PE=4 SV=1								4	4	4	24.7	24.7	24.7	20.287	0	9.9225	51017000	5	15.6236	15.648	15.5431	16.3107	16.0174	15.9547	16.0666	15.7959	15.937	16.0006	15.4428	15.8185	16.6121	15.9221	15.8905	16.5049	16.1589	15.8857	15.8845	16.1594
Q6LXZ5	+	1.50502	-0.415182		0.620041	-0.154846		ABC transporter domain-containing protein OS=Methanococcus maripaludis (strain S2 / LL) OX=267377 GN=MMP1198 PE=4 SV=1								3	3	2	19.7	19.7	16.9	28.619	0	11.473	111940000	4	15.0141	14.8234	14.7909	15.2194	15.1719	15.4467	15.1565	15.7151	15.0383	15.1676	13.1501	13.2258	13.5319	13.2573	13.3759	13.6408	13.3982	13.6491	13.4234	13.443
Q6LXM2	+	2.82629	-0.415678		1.25781	0.170634		Enolase_N domain-containing protein OS=Methanococcus maripaludis (strain S2 / LL) OX=267377 GN=MMP1328 PE=4 SV=1								3	3	3	13.8	13.8	13.8	34.532	0	15.869	309170000	6	17.508	17.2524	17.1787	17.5994	17.7882	17.6689	17.8297	17.7649	17.7211	17.6032	16.7804	16.676	16.8949	16.7931	16.5683	16.6436	16.6335	16.509	16.5313	16.7721
Q6M0F2	+	1.79427	-0.423178		0.168922	-0.117789		TP_methylase domain-containing protein OS=Methanococcus maripaludis (strain S2 / LL) OX=267377 GN=cbiL PE=3 SV=1								3	3	3	18.4	18.4	18.4	25.434	0	9.2675	94904000	4	15.2148	14.6931	15.0709	15.3652	15.4668	15.6891	15.3586	15.2908	15.3263	15.6324	17.1269	17.6521	18.0178	18.0786	17.519	18.1363	17.8361	17.2522	17.4782	17.7385
Q6M0C2	+	5.01473	-0.423345		0.29627	0.149483		BcrAD_BadFG domain-containing protein OS=Methanococcus maripaludis (strain S2 / LL) OX=267377 GN=MMP0349 PE=4 SV=1								4	4	4	18.3	18.3	18.3	27.135	0	10.767	185320000	5	16.6836	16.6569	16.6438	17.1716	17.0168	17.1232	17.0162	17.1065	17.0746	16.9315	15.3192	15.6781	15.4536	15.7887	15.1116	15.514	15.5666	14.9134	15.1105	15.342
Q6M0J6	+	2.35411	-0.423841		0.840178	0.374897		Hydrogenase expression/formation protein OS=Methanococcus maripaludis (strain S2 / LL) OX=267377 GN=hypE PE=4 SV=1								6	6	6	23.1	23.1	23.1	35.178	0	24.714	634360000	14	18.0847	17.9762	17.8243	18.597	18.3939	18.1981	18.5035	18.3751	18.2457	18.2235	17.8554	18.6851	18.6317	18.2815	18.1023	18.2555	17.9837	17.6867	17.7853	18.0844
Q6M0Y1	+	1.4851	-0.427417		0.512565	0.240494		Probable deoxyhypusine synthase OS=Methanococcus maripaludis (strain S2 / LL) OX=267377 GN=dys PE=3 SV=1								5	5	5	13	13	13	38.353	0	9.9726	198130000	6	16.4656	16.4019	16.4537	16.885	17.1173	17.2281	16.7462	16.5013	16.7293	16.7231	16.9298	17.6702	17.7238	17.3746	17.0816	17.4949	17.0194	16.898	17.3362	17.2642
Q6M160	+	2.96189	-0.435996		0.188794	-0.0718018		5-amino-6-(D-ribitylamino)uracil--L-tyrosine 4-hydroxyphenyl transferase 2 OS=Methanococcus maripaludis (strain S2 / LL) OX=267377 GN=cofH2 PE=3 SV=1								12	12	11	38.5	38.5	36.6	39.482	0	57.185	1211500000	22	19.1727	18.9084	18.9951	19.5517	19.4909	19.2856	19.5831	19.4107	19.4464	19.3197	19.1621	19.523	19.6783	19.4653	19.3068	19.8691	19.4507	19.5117	19.5541	19.5711
Q6LWN0	+	1.44971	-0.436841		0.666569	0.231998		UPF0179 protein MMP1679 OS=Methanococcus maripaludis (strain S2 / LL) OX=267377 GN=MMP1679 PE=3 SV=1								2	2	2	17.9	17.9	17.9	16.1	0	8.7493	183660000	3	16.3406	16.3534	16.4156	16.6677	16.8787	16.6868	17.136	17.0785	16.3928	16.6181	15.7615	15.2563	15.4737	15.5415	15.0231	15.2021	15.5468	15.021	15.2566	15.3612
Q6LX54	+	2.03672	-0.437193		0.172754	0.0964975		Uncharacterized protein OS=Methanococcus maripaludis (strain S2 / LL) OX=267377 GN=MMP1498 PE=1 SV=1								5	5	5	20	20	20	29.261	0	15.63	370670000	8	17.8224	17.9295	18.1009	18.5571	18.5615	18.0823	18.4525	18.4084	18.2669	18.2621	17.4454	17.884	18.1701	17.8789	17.8991	18.1089	17.6629	17.3161	17.554	17.7446
P62423	+	2.23892	-0.437272		0.0281539	0.00937494		Phosphoglycerate kinase OS=Methanococcus maripaludis (strain S2 / LL) OX=267377 GN=pgk PE=3 SV=1								9	9	9	25.1	25.1	25.1	45.329	0	55.371	415480000	15	17.5784	17.8095	18.0695	18.2161	18.325	18.4144	18.1758	18.2756	18.1316	18.1747	17.9481	18.2698	18.2255	18.2813	18.179	18.2924	18.1884	17.9627	17.9268	18.1368
Q6LYG0	+	1.38568	-0.43951		1.35554	-0.327279		Adenylate kinase OS=Methanococcus maripaludis (strain S2 / LL) OX=267377 GN=adkA PE=1 SV=1								10	10	10	68.8	68.8	68.8	21.094	0	51.805	4422600000	29	19.0815	19.8084	19.6124	19.9793	19.8936	19.6584	20.0608	20.164	19.8857	19.7338	19.9372	19.7169	19.766	19.9994	20.3773	19.9812	19.9004	20.1519	20.3938	20.011
Q6LXD3	+	1.69039	-0.443005		0.143942	-0.0439246		30S ribosomal protein S5 OS=Methanococcus maripaludis (strain S2 / LL) OX=267377 GN=rps5 PE=3 SV=1								12	12	12	53.3	53.3	53.3	24.376	0	48.464	8314000000	29	20.7128	20.733	20.3704	21.2136	21.1193	20.6807	21.2633	20.9419	21.0717	20.9119	20.8347	20.844	21.3038	21.0999	20.9139	21.1827	21.0041	20.9667	21.0613	21.021
Q6LYV6	+	2.13799	-0.443968		0.0315521	-0.0176497		Uncharacterized protein OS=Methanococcus maripaludis (strain S2 / LL) OX=267377 GN=MMP0881 PE=4 SV=1								3	3	3	34.5	34.5	34.5	13.505	0	11.568	120670000	6	14.0865	14.1055	13.8601	14.2531	14.3767	14.5801	14.7504	14.3518	14.4559	14.3941	15.7288	16.3243	16.4322	16.2927	16.1295	16.5698	16.0095	16.0148	16.0603	16.0694
Q6LYP3	+	1.7683	-0.445125		0.104454	0.0204913		AFOR_N domain-containing protein OS=Methanococcus maripaludis (strain S2 / LL) OX=267377 GN=MMP0945 PE=4 SV=1								7	7	7	14.4	14.4	14.4	70.849	0	21.131	248550000	11	16.9961	17.0277	17.5694	17.5541	17.6932	17.8507	17.6857	17.5581	17.5155	17.5097	17.9937	18.175	18.1602	18.1617	18.1781	18.2009	18.0365	17.9574	18.0001	18.0066
Q6M0M2	+	2.75624	-0.448441		0.253652	-0.128627		DNA-directed RNA polymerase related protein OS=Methanococcus maripaludis (strain S2 / LL) OX=267377 GN=MMP0248 PE=4 SV=1								1	1	1	21.7	21.7	21.7	5.1843	0.0031056	3.2591	988500000	2	16.2633	16.1332	16.0228	16.7399	16.4905	16.6826	16.6781	16.5407	16.3972	16.4012	17.0938	16.3298	17.0668	17.2284	16.9342	16.8011	17.2282	16.7585	16.8022	16.883
Q6M124	+	2.24962	-0.451973		0.815879	0.16547		tRNA pseudouridine synthase Pus10 OS=Methanococcus maripaludis (strain S2 / LL) OX=267377 GN=pus10 PE=3 SV=1								6	6	6	17.7	17.7	17.7	54.488	0	32.632	243750000	9	15.9798	16.3131	16.4952	16.8193	16.712	16.8348	16.6363	16.698	16.5878	16.6194	16.9321	17.4429	17.1996	17.0283	17.0242	17.0116	16.9206	17.0866	17.0851	17.0692
Q6LWX4	+	2.72132	-0.453688		0.291037	0.103376		Pterin-binding domain-containing protein OS=Methanococcus maripaludis (strain S2 / LL) OX=267377 GN=MMP1580 PE=4 SV=1								2	2	2	8.8	8.8	8.8	59.723	0	5.4259	26027000	3	12.4442	12.3794	12.4877	13.086	12.9975	12.9065	12.916	12.6546	12.7839	12.5962	13.2325	13.243	13.3923	13.3718	13.3188	13.0615	13.2825	13.3385	12.7423	13.5036
Q6LZM9	+	1.56822	-0.459701		0.559776	0.0978454		O-phosphoseryl-tRNA(Sec) selenium transferase OS=Methanococcus maripaludis (strain S2 / LL) OX=267377 GN=spcS PE=1 SV=1								4	4	4	11	11	11	48.446	0	17.867	123610000	6	16.2401	16.2349	16.2576	16.4774	16.7889	17.1212	16.7798	16.7285	16.3276	16.5391	15.94	16.077	15.7507	15.8598	15.9865	15.8114	15.8084	15.7541	15.7282	15.7837
Q6M083	+	2.43168	-0.460542		1.38007	-0.215733		Digeranylgeranylglycerophospholipid reductase OS=Methanococcus maripaludis (strain S2 / LL) OX=267377 GN=MMP0388 PE=3 SV=1								14	14	14	47.4	47.4	47.4	42.545	0	99.93	2821100000	28	19.6326	19.6174	19.888	20.0508	20.3047	20.3698	20.2307	20.1041	19.9792	20.0096	19.4646	19.6558	19.8928	19.824	19.9603	19.9297	19.893	19.8466	19.8672	19.744
Q6M086	+	2.65884	-0.462216		1.1926	-0.130768		Uridylate kinase OS=Methanococcus maripaludis (strain S2 / LL) OX=267377 GN=pyrH PE=3 SV=1								5	5	5	28.4	28.4	28.4	23.932	0	19.648	236150000	7	16.841	16.9727	17.0196	17.5269	17.3432	17.4119	17.296	17.2237	17.6384	17.3391	16.4689	16.3647	16.5185	16.5941	16.7074	16.5756	16.4394	16.6093	16.5631	16.4617
P61370	+	1.55843	-0.462387		1.19894	-0.230014		50S ribosomal protein L15e OS=Methanococcus maripaludis (strain S2 / LL) OX=267377 GN=rpl15e PE=3 SV=1								9	9	9	36.6	36.6	36.6	22.22	0	29.939	2639800000	15	20.0188	19.8281	19.6952	20.3374	20.3832	19.8597	20.6527	20.2405	20.3852	20.2112	18.8073	18.9014	19.2444	19.308	19.1422	19.3523	19.1344	19.1303	19.2189	19.1623
Q6LZI8	+	1.69285	-0.467255		1.32653	-0.357854		30S ribosomal protein S28e OS=Methanococcus maripaludis (strain S2 / LL) OX=267377 GN=rps28e PE=3 SV=1								2	2	2	25	25	25	8.4568	0	4.7159	754260000	5	17.3278	17.3615	16.9444	17.9837	17.7606	17.3874	17.718	17.47	17.7513	17.5921	17.3057	17.0586	17.7341	17.7455	17.5671	17.8441	17.8367	17.5766	17.7741	17.657
Q6LYJ9	+	1.71667	-0.468499		0.336323	-0.0543893		Conserved hypothetical archaeal protein OS=Methanococcus maripaludis (strain S2 / LL) OX=267377 GN=MMP0992 PE=4 SV=1								4	4	4	28.9	28.9	28.9	19.538	0	25.862	90701000	8	15.3531	15.3131	15.6171	15.5478	15.9263	16.2232	15.9909	15.9813	15.7079	15.8175	15.7006	15.9554	15.8257	15.7976	15.9758	15.7632	15.8977	15.9037	15.9517	15.8618
Q6LZC1	+	3.23882	-0.469586		0.410164	-0.157815		(5-formylfuran-3-yl)methyl phosphate synthase OS=Methanococcus maripaludis (strain S2 / LL) OX=267377 GN=mfnB PE=3 SV=1								9	9	9	44.1	44.1	44.1	25.114	0	50.122	1575200000	18	19.5448	19.5247	19.7418	20.0503	20.1342	20.2454	20.0839	19.9798	19.9466	19.9805	19.8986	20.2055	20.4671	20.4148	20.1951	20.7514	20.3566	20.1226	20.2488	20.3574
Q6LXM9	+	1.88564	-0.474102		0.812809	-0.219321		30S ribosomal protein S11 OS=Methanococcus maripaludis (strain S2 / LL) OX=267377 GN=rps11 PE=3 SV=1								8	8	8	53.2	53.2	53.2	13.418	0	25.592	3878200000	18	21.0292	21.1184	20.7195	21.5359	21.5034	21.0924	21.6801	21.3459	21.421	21.2952	20.2646	20.0431	20.645	20.5549	20.3885	20.7484	20.5106	20.443	20.5759	20.5061
Q6LXU6	+	2.16661	-0.47831		1.20914	-1.16506		Uncharacterized protein OS=Methanococcus maripaludis (strain S2 / LL) OX=267377 GN=MMP1251 PE=4 SV=1								11	11	11	65.6	65.6	65.6	20.246	0	50.233	3115200000	21	20.2747	20.4473	20.5418	20.9853	20.7544	20.6255	20.8367	21.0837	21.1118	20.7905	19.9891	17.8777	17.8637	19.9852	19.6541	18.9945	20.2122	19.7464	19.8589	19.5276
Q6LYC2	+	1.44598	-0.479147		0.651826	-0.297825		Peptidase_S49 domain-containing protein OS=Methanococcus maripaludis (strain S2 / LL) OX=267377 GN=MMP1069 PE=4 SV=1								1	1	1	4.2	4.2	4.2	33.747	0	4.3696	23083000	2	11.8082	11.4203	12.0962	12.0332	12.4111	12.5912	12.1093	12.0638	12.316	12.2331	13.1892	12.6199	12.7076	12.7402	13.2296	13.0234	12.8548	13.4425	13.5301	12.7077
Q6LX38	+	2.64476	-0.479174		0.726135	-0.478152		Chaperonin GroEL (Thermosome, HSP60 family) OS=Methanococcus maripaludis (strain S2 / LL) OX=267377 GN=hsp60 PE=3 SV=1								40	40	40	67	67	67	58.215	0	323.31	77298000000	231	23.0627	23.199	22.9769	23.7048	23.64	23.3459	23.73	23.4972	23.4345	23.4011	23.4978	23.6925	24.4043	24.0534	24.4251	25.1904	23.8688	24.2458	24.2746	24.2888
P0CW59	+	1.22912	-0.480081		0.0155641	-0.00815741		DNA repair and recombination protein RadA OS=Methanococcus maripaludis (strain S2 / LL) OX=267377 GN=radA PE=3 SV=1								14	14	14	58.1	58.1	58.1	35.146	0	88.012	4490600000	31	19.8495	20.0296	20.3917	20.7336	20.505	20.0519	20.9991	20.5597	20.5726	20.4782	20.4937	20.9604	21.1707	21.0994	20.8302	20.9298	21.0902	20.5662	20.7827	20.8578
Q6LY50	+	1.32525	-0.488837		0.390503	-0.173794		Metallophos_2 domain-containing protein OS=Methanococcus maripaludis (strain S2 / LL) OX=267377 GN=MMP1142 PE=4 SV=1								1	1	1	4.2	4.2	4.2	27.89	0.0070281	2.6305	20813000	2	12.5171	11.8943	12.8003	13.1609	12.6688	12.8657	12.825	13.0212	12.815	13.1125	13.935	13.4548	13.1334	13.5322	14.0153	13.4769	13.5386	13.8281	13.6981	13.7357
Q6LXD1	+	1.67095	-0.489737		0.128085	0.0466439		50S ribosomal protein L15 OS=Methanococcus maripaludis (strain S2 / LL) OX=267377 GN=rpl15 PE=3 SV=1								9	9	9	53.8	53.8	53.8	15.951	0	31.66	3887600000	23	20.3049	20.061	19.9317	20.8905	20.5658	20.2347	20.6698	20.3745	20.7984	20.433	20.331	20.275	20.7236	20.6374	20.2671	20.5066	20.4909	20.2369	20.2406	20.4169
Q6M0E4	+	2.40685	-0.498885		0.0683392	0.021383		AMP phosphorylase OS=Methanococcus maripaludis (strain S2 / LL) OX=267377 GN=MMP0327 PE=3 SV=1								13	13	13	32.1	32.1	32.1	54.597	0	40.352	596310000	18	18.0953	18.2237	17.976	18.755	18.5337	18.2593	18.7039	18.6461	18.6853	18.4456	18.52	18.1975	18.1477	18.4572	18.1783	18.1195	18.3843	18.3114	18.1515	18.2889
Q6LWU0	+	1.99915	-0.499362		1.05061	-0.10537		Aspartate--tRNA(Asp/Asn) ligase OS=Methanococcus maripaludis (strain S2 / LL) OX=267377 GN=aspS PE=3 SV=1								24	24	24	60	60	60	50.131	0	98.163	2802000000	43	19.8638	19.9491	20.2722	20.3955	20.7392	20.7499	20.6056	20.3759	20.3001	20.3689	20.1648	20.3343	20.3782	20.4371	20.4338	20.4249	20.432	20.3444	20.3146	20.3369
Q6LY69	+	2.7345	-0.502494		0.169537	0.0482432		OBG-type G domain-containing protein OS=Methanococcus maripaludis (strain S2 / LL) OX=267377 GN=MMP1122 PE=4 SV=1								14	14	13	42.9	42.9	42.9	43.375	0	59.116	749920000	19	18.2616	18.3217	18.3166	19.0134	18.958	18.6308	18.8926	18.6391	18.681	18.6571	18.5824	18.6655	18.798	18.9206	18.5754	18.5331	18.7688	18.5076	18.4969	18.5655
Q6LXG7	+	1.86656	-0.504938		0.101136	-0.0538274		Coenzyme F420-reducing hydrogenase subunit gamma OS=Methanococcus maripaludis (strain S2 / LL) OX=267377 GN=fruG PE=4 SV=1								2	2	2	4.8	4.8	4.8	24.115	0	4.2738	263760000	4	15.8624	16.3559	15.9824	16.3	16.839	16.47	16.4573	16.7425	16.6223	16.501	15.8696	15.8391	16.0819	16.056	15.9394	15.5116	16.4881	15.8534	16.0557	15.9061
Q6LXX3	+	1.69255	-0.50803		0.195278	0.0729297		Conserved hypothetical archaeal protein OS=Methanococcus maripaludis (strain S2 / LL) OX=267377 GN=MMP1223 PE=4 SV=1								16	16	16	37.6	37.6	37.6	52.989	0	76.754	2102900000	36	19.7496	20.0424	20.0286	20.2424	20.5116	20.939	20.2368	20.4465	20.313	20.3133	20.636	20.525	20.1502	20.2827	20.5686	20.0701	20.4658	20.5223	20.2753	20.3612
Q6LXE7	+	1.7387	-0.512741		0.024722	-0.00908311		30S ribosomal protein S3 OS=Methanococcus maripaludis (strain S2 / LL) OX=267377 GN=rps3 PE=3 SV=1								14	14	14	62.6	62.6	62.6	23.254	0	61.048	9911800000	38	21.5757	21.6673	21.1335	22.1065	22.0577	21.5933	22.208	21.9024	21.9616	21.8379	21.4805	21.4958	21.9897	21.7582	21.5819	21.8299	21.6421	21.5894	21.5852	21.6505
Q6M026	+	1.14133	-0.524779		2.38708	-0.775383		Nitro_FeMo-Co domain-containing protein OS=Methanococcus maripaludis (strain S2 / LL) OX=267377 GN=MMP0447 PE=4 SV=1								3	3	3	35.3	35.3	35.3	12.683	0	20.264	1267200000	7	17.0133	17.0691	16.3873	17.3996	16.9716	17.0169	17.7042	17.7711	17.2247	17.1482	17.2783	17.406	17.2359	17.7199	18.3121	18.3926	17.6939	18.1125	18.2618	17.9305
Q6LYH0	+	1.75385	-0.527933		0.537863	0.229187		Uncharacterized protein OS=Methanococcus maripaludis (strain S2 / LL) OX=267377 GN=MMP1021 PE=4 SV=1								7	7	7	20.1	20.1	20.1	57.775	0	40.361	246880000	13	14.5227	15.2922	15.0918	15.5923	15.6989	15.4189	15.5088	15.4432	15.319	15.3123	18.4774	18.6336	18.0652	18	17.8987	17.947	18.2947	18.6392	18.1978	18.2011
Q6LZP7	+	2.08741	-0.52873		0.914792	-0.207127		30S ribosomal protein S17e OS=Methanococcus maripaludis (strain S2 / LL) OX=267377 GN=rps17e PE=3 SV=1								9	9	9	71.4	71.4	71.4	7.2654	0	29.201	2865700000	21	20.0983	20.1077	19.7899	20.7629	20.513	20.1784	20.6411	20.3968	20.6719	20.3414	19.8481	19.7359	20.1727	20.2806	19.9895	20.2882	20.1053	19.9799	20.1127	20.0704
Q6LYK0	+	2.40256	-0.535342		0.312059	0.0937691		Uncharacterized protein OS=Methanococcus maripaludis (strain S2 / LL) OX=267377 GN=MMP0991 PE=4 SV=1								9	9	9	19.9	19.9	19.9	60.722	0	35.82	797720000	13	17.1891	17.1568	17.6652	17.7955	17.7673	17.9892	17.9802	17.9524	17.7497	17.6569	18.6524	18.8865	18.9334	18.5714	18.7502	18.8434	18.7107	18.4848	19.0215	18.7176
P62647	+	1.55408	-0.535795		0.632487	0.35707		Protein-glutamate methylesterase/protein-glutamine glutaminase OS=Methanococcus maripaludis (strain S2 / LL) OX=267377 GN=cheB PE=3 SV=1								2	2	2	6.3	6.3	6.3	39.791	0	4.5489	48218000	3	14.5821	14.1375	14.162	14.8468	15.0309	15.2771	14.5243	14.6798	14.619	14.7151	15.1072	14.3622	14.5584	14.6337	14.211	14.4666	14.809	13.9961	13.7968	14.3271
Q6LXB5	+	2.06824	-0.545572		0.0964764	0.0278769		Type 2 DNA topoisomerase 6 subunit A OS=Methanococcus maripaludis (strain S2 / LL) OX=267377 GN=top6A PE=3 SV=1								10	10	10	30.1	30.1	30.1	47.743	0	31.587	511710000	19	18.6329	18.7723	19.012	19.1275	19.5383	19.5961	19.4751	19.3074	19.0636	19.1853	18.0396	18.2697	18.4252	18.3874	18.1758	18.3006	18.2868	18.0598	18.0913	18.1945
Q6M0B9	+	1.98365	-0.54606		1.17734	-0.279167		UDP-N-acetylglucosamine 3-dehydrogenase OS=Methanococcus maripaludis (strain S2 / LL) OX=267377 GN=MMP0352 PE=1 SV=1								7	7	7	32.2	32.2	32.2	34.363	0	36.404	471440000	12	17.7499	17.7659	18.2483	18.4097	18.6931	18.7198	18.3984	18.319	18.2645	18.374	18.0971	18.2543	18.4836	18.733	18.5515	18.6443	18.6415	18.2253	18.5493	18.448
Q6M082	+	2.21063	-0.54643		3.24727	-0.481962		Ferredoxin OS=Methanococcus maripaludis (strain S2 / LL) OX=267377 GN=MMP0389 PE=4 SV=1								2	2	2	31.5	31.5	31.5	5.9821	0	5.6737	271190000	4	16.7665	16.9039	17.1588	17.4306	17.5782	17.8284	17.458	17.2307	17.4112	17.3063	17.1689	17.3086	17.3061	17.8258	17.856	17.5936	17.876	17.6129	17.6948	17.619
Q6M0X8	+	1.89372	-0.546986		1.45149	-0.586934		Carbamoyltransferase OS=Methanococcus maripaludis (strain S2 / LL) OX=267377 GN=MMP0140 PE=3 SV=1								2	2	2	3.6	3.6	3.6	86.91	0.001073	3.7462	47423000	2	13.4407	13.7669	13.4416	14.1996	13.8437	13.9682	14.0191	14.5475	14.0021	14.1467	16.0595	15.6575	16.4576	16.2168	16.666	16.9843	16.4362	16.7077	16.8599	16.6284
Q6LXU5	+	3.07418	-0.550957		0.076374	-0.0281169		CBS domain OS=Methanococcus maripaludis (strain S2 / LL) OX=267377 GN=MMP1252 PE=4 SV=1								10	10	10	43.4	43.4	43.4	31.433	0	36.563	910370000	13	18.8003	19.0066	19.2111	19.6187	19.6222	19.4509	19.4578	19.495	19.6972	19.4631	18.2449	18.1557	18.3727	18.4285	18.0447	18.4114	18.5598	18.0659	18.2048	18.2944
Q6M041	+	2.92236	-0.552702		0.12542	-0.0369387		Rhodopsin-like GPCR superfamily:Beta-lactamase-like OS=Methanococcus maripaludis (strain S2 / LL) OX=267377 GN=MMP0431 PE=4 SV=1								11	11	11	30.9	30.9	30.9	48.606	0	32.582	908760000	18	18.8611	18.7034	18.6444	19.236	19.2912	19.5924	19.1472	19.1652	19.3022	19.125	19.3547	19.2372	18.9804	19.3332	19.2393	18.9925	19.4014	19.1769	19.2229	19.1811
P61400	+	2.69841	-0.552977		0.00982168	0.00227102		Glutamyl-tRNA(Gln) amidotransferase subunit D OS=Methanococcus maripaludis (strain S2 / LL) OX=267377 GN=gatD PE=3 SV=1								13	13	13	40.9	40.9	40.9	45.981	0	56.905	1133200000	24	19.1952	19.2287	19.4505	19.7162	19.9328	20.1478	19.7521	19.8263	19.6915	19.7191	19.4366	19.6029	19.6222	19.7158	19.5241	19.506	19.6672	19.4599	19.4367	19.4999
Q6LZY6	+	1.27699	-0.56977		0.190869	-0.154421		Uncharacterized protein OS=Methanococcus maripaludis (strain S2 / LL) OX=267377 GN=MMP0487 PE=4 SV=1								12	5	5	25.2	9.3	9.3	79.51	0	22.625	205030000	8	15.6341	15.2016	15.5626	16.0244	15.9216	15.8857	16.7941	15.8443	15.7452	15.9058	16.8888	16.1504	16.9821	17.3665	16.538	16.8428	17.384	16.4525	16.3853	16.755
P0CW43	+	3.86317	-0.579896		0.0109729	0.00679525		Tungsten-containing formylmethanofuran dehydrogenase 2 subunit C OS=Methanococcus maripaludis (strain S2 / LL) OX=267377 GN=fwdC PE=3 SV=1								17	17	17	56.2	56.2	56.2	29.186	0	145.64	13235000000	58	21.0251	21.037	21.1655	21.5474	21.6024	21.7086	21.8317	21.7246	21.52	21.456	21.9247	22.1811	22.0569	22.426	22.2059	21.4714	22.2891	21.9047	21.9875	22.049
Q6M1A7	+	3.01598	-0.592616		0.192485	-0.0987941		DNA primase large subunit PriL OS=Methanococcus maripaludis (strain S2 / LL) OX=267377 GN=priL PE=3 SV=1								2	2	2	7	7	7	43.374	0	4.0252	43272000	2	16.199	15.7609	16.0298	16.7052	16.4809	16.7357	16.4569	16.6227	16.5337	16.508	11.4409	11.5535	11.7603	12.0073	11.7071	11.4052	11.5703	11.2999	12.1122	11.2876
Q6LXG6	+	1.10523	-0.607084		0.542538	-0.274019		Coenzyme F420-reducing hydrogenase subunit beta OS=Methanococcus maripaludis (strain S2 / LL) OX=267377 GN=fruB PE=4 SV=1								6	2	2	18.4	8.5	8.5	30.776	0	6.4493	338950000	5	17.2014	18.0427	17.1912	17.7642	18.6532	17.6522	17.8914	18.3652	18.1868	18.0162	16.865	17.2148	17.6231	17.55	17.3001	17.2964	18.0616	17.2072	17.6347	17.3952
Q6M0P2	+	3.57219	-0.607903		0.598645	-0.243533		Anaerobic Ribonucleoside-triphosphate reductase OS=Methanococcus maripaludis (strain S2 / LL) OX=267377 GN=nrdD PE=4 SV=1								38	38	38	54.4	54.4	54.4	87.968	0	185.89	11775000000	76	20.8932	20.5259	20.7995	21.4341	21.2534	21.3779	21.4612	21.3063	21.2516	21.1514	21.3993	20.7172	21.2062	21.4318	21.2034	21.0302	21.7356	21.4087	21.2969	21.2675
Q6LYK2	+	2.20043	-0.609723		0.00973298	0.00347773		Type 2 DNA topoisomerase 6 subunit B OS=Methanococcus maripaludis (strain S2 / LL) OX=267377 GN=top6B PE=3 SV=1								9	9	9	18.5	18.5	18.5	76.158	0	42.274	741950000	17	17.5772	17.7937	17.9478	18.3699	18.5996	18.7031	18.3706	18.1087	18.144	18.1837	18.1726	18.5067	18.5635	18.5946	18.3367	18.5036	18.5322	18.2507	18.247	18.3996
Q6LXJ8	+	3.01546	-0.616282		0.73629	-0.292748		Thiamine thiazole synthase OS=Methanococcus maripaludis (strain S2 / LL) OX=267377 GN=thi4 PE=3 SV=1								7	7	7	37.8	37.8	37.8	27.925	0	27.037	1409800000	14	18.3963	18.5603	18.3676	19.0126	19.1997	18.8736	19.3391	18.9167	19.0044	18.8604	18.8494	18.9692	19.3622	19.6236	19.3047	19.7709	19.194	19.0235	19.2014	19.233
Q6M151	+	4.50294	-0.617093		0.917354	-0.276334		Nitrogen regulatory protein P-II OS=Methanococcus maripaludis (strain S2 / LL) OX=267377 GN=glnB PE=3 SV=1								8	8	8	61.6	61.6	61.6	12.494	0	41.036	3741000000	19	19.583	19.4784	19.7485	20.2317	20.2176	20.3206	20.1432	20.1489	20.2602	20.0456	20.0388	20.6821	20.1658	20.5925	20.4704	20.356	20.544	20.7465	20.722	20.4973
Q6LZV7	+	3.53489	-0.61784		0.736337	-0.276796		Nicotinate-nucleotide pyrophosphorylase [carboxylating] OS=Methanococcus maripaludis (strain S2 / LL) OX=267377 GN=modD PE=3 SV=1								5	5	5	21.2	21.2	21.2	31.846	0	12.855	157990000	5	16.4706	16.6825	16.8674	17.1132	17.3538	17.3436	17.2771	17.3129	17.3472	17.1488	16.9012	17.4987	17.387	17.4771	17.444	17.9957	17.4882	17.2811	17.5485	17.4406
Q6LX67	+	4.21048	-0.621933		0.552514	-0.14026		MoCF_biosynth domain-containing protein OS=Methanococcus maripaludis (strain S2 / LL) OX=267377 GN=moaB PE=4 SV=1								3	3	3	17.4	17.4	17.4	17.847	0	8.8143	455350000	4	16.955	16.8975	16.8275	17.4584	17.6907	17.6165	17.4086	17.5073	17.4101	17.423	15.0527	14.9006	14.8316	15.3308	14.9346	14.9977	15.2225	14.8255	15.1003	14.8667
Q6LX59	+	1.02078	-0.625614		0.593952	-0.377258		S_layer_C domain-containing protein OS=Methanococcus maripaludis (strain S2 / LL) OX=267377 GN=MMP1493 PE=4 SV=1								4	4	4	10.7	10.7	10.7	50.225	0	11.452	95447000	6	13.8751	14.308	15.2661	14.7834	15.5749	14.7943	15.1965	15.2711	15.0319	15.035	17.1955	16.7368	16.9919	16.909	16.913	16.9562	17.5271	17.8547	17.952	17.2844
Q6LWU5	+	4.00199	-0.63575		0.433368	0.132948		Formylmethanofuran--tetrahydromethanopterin formyltransferase OS=Methanococcus maripaludis (strain S2 / LL) OX=267377 GN=ftr PE=3 SV=1								16	16	16	57.9	57.9	57.9	32.09	0	65.638	10580000000	54	20.6176	20.7534	20.7992	21.4112	21.3379	21.1946	21.5578	21.3519	21.3015	21.158	21.4045	21.2769	21.0516	21.3221	21.0994	20.7986	21.3443	21.0686	21.0353	21.1247
Q6LYZ6	+	1.61598	-0.647449		0.687161	-0.414157		CobW C-terminal domain-containing protein OS=Methanococcus maripaludis (strain S2 / LL) OX=267377 GN=MMP0833 PE=4 SV=1								3	3	3	11.3	11.3	11.3	33.955	0	7.8195	46681000	4	15.0007	14.7645	14.768	15.5861	15.9747	15.5934	15.6751	15.1652	14.9567	15.4478	13.1758	12.6936	13.5428	13.3556	13.5141	14.2275	13.7625	12.9845	13.4654	13.6247
Q6LXQ7	+	2.24052	-0.648783		0.640588	0.797328		Glyco_hydro_15 domain-containing protein OS=Methanococcus maripaludis (strain S2 / LL) OX=267377 GN=MMP1292 PE=4 SV=1								2	2	2	3.5	3.5	3.5	71.261	0.0070565	2.6594	72115000	2	13.9671	13.5609	14.1519	14.7718	14.4676	14.6988	14.233	14.4352	14.6462	14.3839	16.1619	18.1136	16.6748	15.7805	17.5313	15.6876	15.6852	16.7617	15.6704	16.3865
Q6M0R6	+	1.93747	-0.649033		0.443923	-0.0842129		Thioredoxin OS=Methanococcus maripaludis (strain S2 / LL) OX=267377 GN=MMP0203 PE=3 SV=1								2	2	2	37.7	37.7	37.7	8.4559	0	5.6363	67485000	2	15.1284	15.0332	15.1682	15.5857	15.4669	15.3965	16.164	16.0046	15.9362	15.5069	16.3958	16.7418	16.6325	16.5198	16.6657	16.6522	16.7003	16.7141	16.7932	16.5222
Q6LZB6	+	3.40192	-0.668008		2.62235	0.335613		Indolepyruvate oxidoreductase subunit IorA OS=Methanococcus maripaludis (strain S2 / LL) OX=267377 GN=iorA2 PE=4 SV=1								10	10	10	21.5	21.5	21.5	63.402	0	48.737	734610000	15	17.613	17.6622	17.941	18.2671	18.5137	18.5013	18.5615	18.3554	18.2413	18.1999	18.4528	18.7484	18.6681	18.3557	18.1877	18.3774	18.2728	18.3034	18.228	18.3607
Q6LX58	+	2.74837	-0.672413		0.479637	0.107929		Uncharacterized protein OS=Methanococcus maripaludis (strain S2 / LL) OX=267377 GN=MMP1494 PE=4 SV=1								3	3	3	18.6	18.6	18.6	23.144	0	11.559	101250000	4	14.9761	15.1899	15.6664	15.9931	15.9017	15.8669	15.9481	16.0109	15.9784	15.7549	14.4816	14.6316	14.6192	14.3516	14.596	14.4547	14.5271	14.2191	14.6689	14.4076
Q6M0M9	+	2.3964	-0.684073		1.51249	-0.431615		DUF2341 domain-containing protein OS=Methanococcus maripaludis (strain S2 / LL) OX=267377 GN=MMP0241 PE=4 SV=1								6	6	6	14.5	14.5	14.5	67.136	0	18.973	693970000	9	16.1952	16.3009	15.9914	16.5981	17.0187	17.2462	16.8676	16.6022	16.7469	16.6395	17.096	16.7894	16.5322	17.0783	17.1886	16.982	17.2868	17.3502	17.5389	17.0589
Q6LY52	+	2.53818	-0.718823		1.54758	-0.65642		Ferredoxin OS=Methanococcus maripaludis (strain S2 / LL) OX=267377 GN=fdxA PE=4 SV=1								3	3	2	13.6	13.6	12.3	9.2499	0	5.4354	54914000	3	15.5987	15.7068	15.9138	16.7748	16.2016	16.4325	16.236	16.3578	16.7487	16.3918	16.7466	16.0378	16.3383	17.4911	16.9478	16.718	17.3953	16.8303	16.8016	16.8815
P0CW49	+	3.33638	-0.719184		0.623339	-0.501084		Uncharacterized protein MMP0618 OS=Methanococcus maripaludis (strain S2 / LL) OX=267377 GN=MMP0618 PE=4 SV=1								7	7	7	67	67	67	12.256	0	40.268	2100500000	16	17.624	17.6428	17.7695	18.3767	18.1444	18.2656	18.4198	18.6932	18.4881	18.2765	18.6438	19.5658	18.5818	19.1126	19.807	18.8242	18.935	20.1771	19.7335	19.3506
Q6LWM4	+	0.782242	-0.723815		0.206253	-0.222958		UPF0333 protein MMP1685 OS=Methanococcus maripaludis (strain S2 / LL) OX=267377 GN=MMP1685 PE=3 SV=1								1	1	1	39.2	39.2	39.2	7.7878	0	6.0931	121520000	2	13.8122	13.0656	12.6897	14.9091	14.3325	13.6529	14.2164	13.1204	13.2464	13.914	15.1542	15.922	14.4484	15.7624	15.1699	14.4602	15.6088	16.0448	15.3409	15.5582
Q6LZK7	+	4.3391	-0.728397		0.600803	-0.431762		Methyl coenzyme M reductase, component A2 OS=Methanococcus maripaludis (strain S2 / LL) OX=267377 GN=atwA PE=4 SV=1								24	24	24	49.5	49.5	49.5	59.49	0	106.08	5023000000	54	20.3299	20.2222	20.3891	20.9824	20.8861	20.9757	21.0199	21.2051	21.1836	20.8994	20.5391	21.4618	21.2527	21.0713	21.7464	21.2407	21.0166	22.2659	21.7568	21.4955
Q6LZJ5	+	1.9708	-0.733388		0.83825	0.278195		ATP/GTP-binding site motif A (P-loop) OS=Methanococcus maripaludis (strain S2 / LL) OX=267377 GN=MMP0632 PE=4 SV=1								7	7	7	25	25	25	44.517	0	29.697	248430000	11	16.8355	16.8161	17.1878	17.6058	17.7916	18.2981	17.4931	17.4476	17.443	17.508	16.7482	17.2361	17.3213	17.0848	16.7753	16.8526	16.9421	16.4681	16.8191	16.8857
Q6LZ27	+	2.4543	-0.737536		0.930295	-0.219571		Fe-ADH domain-containing protein OS=Methanococcus maripaludis (strain S2 / LL) OX=267377 GN=MMP0802 PE=4 SV=1								2	2	2	10.8	10.8	10.8	42.455	0	7.1927	18793000	3	10.8376	10.8032	11.2413	11.705	11.5801	11.9179	11.7419	11.9504	11.2944	11.5276	16.0014	15.8444	15.571	15.939	16.2298	15.8236	15.9344	16.1548	16.0694	15.9816
Q6LYW2	+	2.05663	-0.744742		0.0521659	-0.0302388		TPR repeat OS=Methanococcus maripaludis (strain S2 / LL) OX=267377 GN=MMP0873 PE=4 SV=1								1	1	1	1.4	1.4	1.4	65.586	0.007014	2.607	46126000	2	15.6103	15.3853	15.4808	16.5982	15.9818	15.7071	16.46	16.2177	16.4564	15.974	16.4338	16.3962	16.2945	16.8767	16.1968	16.1549	16.8003	16.2685	16.1332	16.4395
Q6M049	+	2.35568	-0.746934		0.255005	0.0987422		Uncharacterized protein OS=Methanococcus maripaludis (strain S2 / LL) OX=267377 GN=MMP0422 PE=4 SV=1								3	3	3	32	32	32	17.653	0	10.862	214380000	5	15.9685	15.7831	16.5981	16.6364	16.9832	16.8647	16.8115	17.02	16.8651	16.635	16.559	16.5127	17.1744	16.6319	16.6335	16.8837	16.6326	16.4817	16.6361	16.5931
Q6LWJ3	+	3.53926	-0.772494		0.580261	-0.246502		H(2)-forming methylenetetrahydromethanopterin dehydrogenase related protein OS=Methanococcus maripaludis (strain S2 / LL) OX=267377 GN=hmdII PE=4 SV=1								17	17	17	72.7	72.7	72.7	36.476	0	75.618	6266700000	34	20.0296	20.0377	20.4451	20.8563	21.051	21.1033	20.7695	20.9215	20.9584	20.7322	20.0134	20.4971	20.3113	20.3416	20.651	20.3883	20.3914	20.2727	21.0776	20.4122
Q6LZE3	+	2.64764	-0.780238		0.593725	-0.325445		2-amino-3,7-dideoxy-D-threo-hept-6-ulosonate synthase OS=Methanococcus maripaludis (strain S2 / LL) OX=267377 GN=aroA PE=3 SV=1								18	18	18	59.9	59.9	59.9	29.418	0	77.415	6836100000	33	19.7799	20.1077	20.0425	20.6997	20.9168	20.7956	20.5717	20.4164	21.1413	20.5514	20.2378	20.5202	20.8735	20.731	20.9441	21.6159	20.5171	20.7075	20.7	20.7886
Q6LXT6	+	5.67493	-0.781452		1.62878	-0.243801		DZANK-type domain-containing protein OS=Methanococcus maripaludis (strain S2 / LL) OX=267377 GN=MMP1261 PE=4 SV=1								5	5	5	16.3	16.3	16.3	21.459	0	15.411	541190000	7	16.7287	16.7766	16.8714	17.6187	17.5174	17.7101	17.5228	17.4969	17.5765	17.3483	17.6549	17.5612	17.5962	17.9224	17.7654	17.74	18.0927	17.7429	17.8238	17.6629
Q6LZB5	+	3.63596	-0.793574		0.0105384	-0.00288041		POR domain-containing protein OS=Methanococcus maripaludis (strain S2 / LL) OX=267377 GN=iorB2 PE=4 SV=1								6	6	6	35.1	35.1	35.1	20.313	0	21.855	264260000	7	16.6567	17.0642	17.1685	17.7062	17.8429	17.8605	17.7775	17.7258	17.6274	17.5427	16.7635	16.9593	17.1897	16.9764	16.9369	17.0982	17.0196	16.8899	16.9211	17.0843
Q6LZE5	+	3.62829	-0.798319		0.95315	-0.984718		SHSP domain-containing protein OS=Methanococcus maripaludis (strain S2 / LL) OX=267377 GN=hsp20 PE=3 SV=1								11	11	11	74.7	74.7	74.7	16.837	0	41.521	2091600000	22	18.3989	18.7008	18.5915	19.5983	19.3427	19.3647	19.2151	19.1508	19.5008	19.1653	19.5713	20.0078	20.6007	20.0616	21.2999	22.2222	20.049	21.3403	21.295	21.0397
Q6LY37	+	1.21967	-0.814981		1.6192	-0.90641		CMD domain-containing protein OS=Methanococcus maripaludis (strain S2 / LL) OX=267377 GN=MMP1156 PE=4 SV=1								8	8	8	76	76	76	11.396	0	34.355	1456500000	13	19.5653	18.131	18.2389	19.7264	19.4219	19.1072	18.9989	19.7587	19.7473	19.2843	18.9258	18.214	18.5678	18.8855	19.4783	19.0563	19.3772	20.027	20.0292	19.3619
Q6LWJ5	+	3.59833	-0.832192		1.32584	-0.40099		Robl_LC7 domain-containing protein OS=Methanococcus maripaludis (strain S2 / LL) OX=267377 GN=MMP1714 PE=4 SV=1								6	6	6	79.8	79.8	79.8	11.959	0	31.508	4510500000	21	19.4742	19.6008	19.8242	20.5288	20.507	20.6892	20.2026	20.3334	20.5305	20.2663	20.5976	20.9818	20.6223	21.0761	21.1781	20.977	21.1288	20.8705	21.5788	21.0833
Q6M0T7	+	2.20004	-0.835348		1.3603	-0.877134		DUF4352 domain-containing protein OS=Methanococcus maripaludis (strain S2 / LL) OX=267377 GN=MMP0181 PE=4 SV=1								3	3	3	24	24	24	19.122	0	18.174	450600000	5	14.9122	15.6169	15.7105	16.0179	16.5902	16.0112	16.1133	16.3699	16.3887	15.9223	17.444	16.7189	16.2845	17.4441	18.0529	17.0036	17.5437	17.7888	18.3245	17.5912
Q6LZ11	+	1.65017	-0.841407		1.08763	-0.551371		Coenzyme F420-reducing hydrogenase subunit gamma OS=Methanococcus maripaludis (strain S2 / LL) OX=267377 GN=frcG PE=4 SV=1								7	7	7	29.3	29.3	29.3	25.91	0	39.016	4868100000	22	19.9405	20.9275	19.7395	20.8105	20.9689	21.5677	20.9184	20.9814	21.0167	20.8412	20.519	21.1354	20.3428	21.1726	21.5748	20.5369	21.1702	21.3775	21.4707	21.0968
Q6LY43	+	2.77154	-0.842875		0.506518	-0.126603		Uroporphyrinogen_deCOase domain-containing protein OS=Methanococcus maripaludis (strain S2 / LL) OX=267377 GN=mtaA PE=4 SV=1								13	13	13	41.8	41.8	41.8	38.982	0	55.608	2631000000	23	19.364	18.9275	19.322	19.959	20.3905	20.2001	20.1519	19.7591	19.8235	19.8271	19.4134	19.712	19.76	19.9429	19.6791	19.5928	19.9349	19.6197	19.7609	19.7285
Q6LWJ4	+	5.07407	-0.843374		1.77395	-1.0727		G domain-containing protein OS=Methanococcus maripaludis (strain S2 / LL) OX=267377 GN=MMP1715 PE=4 SV=1								5	5	5	35.7	35.7	35.7	17.485	0	12.355	185060000	6	16.8377	16.8328	16.6264	17.6501	17.7295	17.6558	17.582	17.5908	17.4457	17.394	16.4818	16.2798	15.1908	16.9346	17.4141	16.5145	16.9828	16.9519	17.5432	16.9022
Q6LXC0	+	3.73456	-0.887101		1.12291	-0.153413		Adenylosuccinate synthetase OS=Methanococcus maripaludis (strain S2 / LL) OX=267377 GN=purA PE=3 SV=1								12	12	12	45	45	45	36.572	0	63.325	2794200000	26	19.5304	19.5854	19.7497	20.7792	20.3253	20.2536	20.6289	20.5606	20.506	20.3235	20.5095	20.405	20.6138	20.7819	20.5332	20.5685	20.7688	20.6995	20.6253	20.6565
Q6LZL9	+	2.97119	-0.893632		0.484174	-0.149725		Uncharacterized protein OS=Methanococcus maripaludis (strain S2 / LL) OX=267377 GN=MMP0605 PE=4 SV=1								3	3	3	15.8	15.8	15.8	20.953	0	8.8002	186100000	5	15.5254	15.808	15.9723	17.0632	16.4981	16.5537	16.5858	16.4334	16.839	16.4176	15.8634	16.0082	16.139	15.9403	16.2765	16.0664	15.8914	16.4533	16.2916	16.198
Q6LZ05	+	3.14816	-0.916652		0.195973	0.125039		Coenzyme F420-non-reducing hydrogenase subunit beta OS=Methanococcus maripaludis (strain S2 / LL) OX=267377 GN=vhcB PE=4 SV=1								3	3	3	7.3	7.3	7.3	43.064	0	9.8021	701500000	7	18.1008	18.4202	18.7905	19.2496	19.1846	19.46	19.5765	19.4204	19.2317	19.1543	18.5873	19.0025	19.1536	19.0607	18.8595	19.2993	18.7526	18.2153	18.5492	18.8517
Q6LXG9	+	1.80388	-0.94909		0.788316	-0.303049		Coenzyme F420-reducing hydrogenase subunit alpha OS=Methanococcus maripaludis (strain S2 / LL) OX=267377 GN=fruA PE=3 SV=2								15	15	15	44	44	44	46.271	0	58.954	1746900000	23	18.1441	19.2653	18.1572	19.0371	19.8174	19.5127	19.2601	19.7393	19.461	19.2545	17.7247	17.9603	18.251	18.4112	18.1406	18.0658	18.701	17.9492	18.4228	18.1556
Q6M040	+	3.69061	-0.96589		1.75463	-0.37146		Uncharacterized protein OS=Methanococcus maripaludis (strain S2 / LL) OX=267377 GN=MMP0432 PE=4 SV=1								6	6	6	22.9	22.9	22.9	28.556	0	22.431	282950000	10	17.5895	17.765	17.7925	18.6799	18.6039	19.0861	18.5382	18.4634	18.7178	18.5121	17.9953	18.2126	17.6178	18.3652	18.2366	18.397	18.334	18.2408	18.3064	18.2118
Q6M142	+	2.76105	-0.980583		0.193378	0.0529995		TRAM domain-containing protein OS=Methanococcus maripaludis (strain S2 / LL) OX=267377 GN=MMP0076 PE=1 SV=1								6	6	6	68.1	68.1	68.1	7.3885	0	25.058	20122000000	27	20.0015	20.5356	20.7775	21.5153	21.4999	21.359	21.6046	20.9995	21.5344	21.177	21.6443	21.4916	21.9038	21.8078	21.604	21.6431	21.6708	21.4197	21.6162	21.6521
Q6LZC5	+	2.62589	-0.990091		0.508885	-0.220034		Iron-sulfur cluster carrier protein OS=Methanococcus maripaludis (strain S2 / LL) OX=267377 GN=MMP0704 PE=1 SV=1								8	8	8	18.7	18.7	18.7	31.034	0	21.041	1906600000	15	18.4719	18.8324	19.1072	19.5395	19.7915	20.1491	20.145	19.6667	19.4718	19.4989	18.5197	19.3374	19.4816	19.3653	19.2989	19.4002	19.2256	19.2904	19.4173	19.2759
Q6LXY3	+	2.75756	-0.999122		1.9392	-0.789554		UPF0219 protein MMP1211 OS=Methanococcus maripaludis (strain S2 / LL) OX=267377 GN=MMP1211 PE=3 SV=1								19	19	19	51.9	51.9	51.9	37.737	0	83.028	11725000000	61	21.1207	21.1541	21.571	22.0476	22.564	22.6948	21.9402	22.3342	22.1055	22.0333	20.644	20.6041	21.4429	21.8184	21.8187	21.9497	21.7537	21.2807	21.4981	21.4444
Q6LZ04	+	4.52208	-1.01458		0.0246913	0.0171286		CoB--CoM heterodisulfide reductase iron-sulfur subunit A OS=Methanococcus maripaludis (strain S2 / LL) OX=267377 GN=hdrA PE=3 SV=1								24	24	24	39.1	39.1	39.1	71.348	0	113.54	28200000000	103	20.6708	20.8667	21.0892	21.9293	21.7262	21.9221	22.0841	21.8423	21.8369	21.6157	22.5755	22.9878	23.0241	23.1327	22.9161	23.3209	22.7516	22.2814	22.6694	22.8707
Q6LZ41	+	3.703	-1.02003		0.391489	-0.375415		Uncharacterized protein OS=Methanococcus maripaludis (strain S2 / LL) OX=267377 GN=MMP0788 PE=4 SV=1								16	15	9	29.4	28.1	13.3	77.958	0	51.97	597050000	20	16.8703	16.6889	17.0427	18.2522	17.8412	17.7558	17.99	17.6342	17.8505	17.7315	18.923	18.3822	19.5816	19.8212	19.32	19.2357	20.1948	18.5292	18.9252	19.3087
Q6M0L7	+	2.56532	-1.02823		1.12634	-0.45737		CoA_binding domain-containing protein OS=Methanococcus maripaludis (strain S2 / LL) OX=267377 GN=acd PE=4 SV=1								34	34	34	53.8	53.8	53.8	76.64	0	211.49	14565000000	77	20.445	20.6487	21.4813	21.8532	22.078	21.993	21.6197	21.8806	21.8948	21.6084	21.2036	21.7972	22.1154	22.4204	22.0446	22.0407	22.4101	21.8731	22.1876	22.0391
Q6LZ67	+	4.18119	-1.04846		1.03602	-0.505946		TPR_REGION domain-containing protein OS=Methanococcus maripaludis (strain S2 / LL) OX=267377 GN=MMP0762 PE=4 SV=1								4	4	4	26.9	26.9	26.9	20.39	0	18.079	189770000	9	16.189	16.5378	16.3336	17.3331	17.4103	17.083	17.5559	17.5252	17.5041	17.0772	17.8127	17.3873	16.8211	17.8047	17.9541	17.3185	17.7664	18.0879	18.1463	17.6623
Q6LY55	+	3.60971	-1.07716		1.60067	-1.14523		Ferritin-like diiron domain-containing protein OS=Methanococcus maripaludis (strain S2 / LL) OX=267377 GN=MMP1136 PE=4 SV=1								16	16	16	66.9	66.9	66.9	15.645	0	93.737	56635000000	97	23.3048	23.1689	22.7638	24.3813	23.8168	24.1315	24.1935	24.1171	24.2978	23.9147	22.8531	21.7667	20.9433	23.2472	23.1504	22.4548	23.2361	22.9214	22.9878	22.7474
Q6LX40	+	3.63955	-1.08557		0.141271	0.0576299		Alanine dehydrogenase OS=Methanococcus maripaludis (strain S2 / LL) OX=267377 GN=ald PE=1 SV=1								14	14	14	49.3	49.3	49.3	39.654	0	53.375	982500000	20	18.914	19.0105	19.5313	20.1284	20.3403	20.1371	20.1617	20.1417	20.5159	20.023	19.4213	18.8444	18.894	19.1392	18.9289	19.2389	18.9731	18.7914	18.9021	19.0048
Q6LZ26	+	2.55077	-1.09968		0.138857	-0.133052		4Fe-4S ferredoxin-type domain-containing protein OS=Methanococcus maripaludis (strain S2 / LL) OX=267377 GN=MMP0803 PE=4 SV=1								2	2	2	4.9	4.9	4.9	41.711	0.0050865	2.8119	878380000	3	16.3943	16.9627	17.1396	17.8342	17.8689	17.7938	18.4519	18.1428	17.4996	17.4895	17.776	18.5814	18.7013	18.9012	18.5246	19.0038	18.5664	17.5366	18.3831	18.3079
Q6LXH8	+	3.34294	-1.10582		0.0539779	0.0255171		5-formaminoimidazole-4-carboxamide-1-(beta)-D-ribofuranosyl 5-monophosphate synthetase OS=Methanococcus maripaludis (strain S2 / LL) OX=267377 GN=purP PE=3 SV=1								19	19	19	47.4	47.4	47.4	40.413	0	87.548	7860800000	43	20.41	20.6117	20.178	21.4169	21.7819	21.8842	21.2033	21.3587	21.3894	21.2422	21.0114	20.5227	20.5736	20.8211	20.6601	20.3623	20.9412	20.8046	20.4731	20.7029
Q6LZ06	+	3.71073	-1.11898		0.140617	-0.10904		Coenzyme F420-non-reducing hydrogenase subunit alpha OS=Methanococcus maripaludis (strain S2 / LL) OX=267377 GN=vhcA PE=3 SV=1								32	32	32	57.5	57.5	57.5	52.672	0	191.53	34755000000	95	21.7937	21.9846	22.4042	23.1691	22.9743	23.2013	23.4816	23.2088	23.0439	22.8933	23.0995	23.5172	23.7274	23.8268	23.5506	24.2559	23.4205	22.9194	23.3694	23.5721
Q6LZ07	+	3.69719	-1.12418		0.150589	-0.0896184		Oxidored_q6 domain-containing protein OS=Methanococcus maripaludis (strain S2 / LL) OX=267377 GN=vhcG PE=4 SV=1								20	20	20	41.7	41.7	41.7	32.679	0	85.914	16592000000	60	20.1379	20.3923	20.7966	21.5933	21.3592	21.7046	21.784	21.4118	21.5458	21.2836	21.2457	21.6368	21.6802	21.8262	21.5644	22.1429	21.5962	21.1087	21.4249	21.6327
Q6LYD8	+	4.47649	-1.129		0.253059	-0.183119		H(2)/formate:CoB-CoM heterodisulfide,ferredoxin reductase subunit B2 OS=Methanococcus maripaludis (strain S2 / LL) OX=267377 GN=hdrB2 PE=1 SV=1								13	13	13	48.8	48.8	48.8	32.026	0	63.791	6994400000	32	19.4752	19.8652	19.9187	21.1183	20.9089	20.777	20.9081	20.8207	20.7592	20.5843	20.4106	20.9136	21.1985	21.2762	20.9912	21.572	21.1273	20.2964	20.881	20.9649
Q6LZ08	+	3.68416	-1.13396		0.176098	-0.0849768		FlpD domain-containing protein OS=Methanococcus maripaludis (strain S2 / LL) OX=267377 GN=vhcD PE=4 SV=1								8	8	8	42.9	42.9	42.9	15.951	0	49.59	4980500000	26	19.8854	20.0934	20.5757	21.3212	21.0802	21.3231	21.5527	21.352	21.2837	21.0807	20.4297	20.6705	20.5838	20.8742	20.7399	21.0017	20.632	20.1364	20.4933	20.5714
Q6LXY4	+	2.14216	-1.17528		0.894726	-0.350559		HTH cro/C1-type domain-containing protein OS=Methanococcus maripaludis (strain S2 / LL) OX=267377 GN=MMP1210 PE=4 SV=1								8	8	8	34.5	34.5	34.5	25.6	0	60.288	519090000	14	16.3298	16.3896	17.3138	17.737	18.0672	18.4998	17.3381	17.7269	17.7491	17.568	18.0579	18.2056	18.6508	18.795	18.8627	18.9915	18.5663	18.2463	18.4704	18.4727
Q6LXY1	+	2.99506	-1.21312		1.83252	-0.697101		Uncharacterized protein OS=Methanococcus maripaludis (strain S2 / LL) OX=267377 GN=MMP1213 PE=4 SV=1								6	6	6	40.8	40.8	40.8	14.842	0	18.904	3555700000	15	18.9736	18.9753	19.5325	20.1731	20.605	20.9125	20.118	20.2357	20.1971	20.0371	19.0769	18.846	19.7273	20.1001	19.7676	20.0692	20.1422	19.6088	19.7951	19.7226
Q6M0I3	+	2.99232	-1.2395		0.0268864	0.017437		Uncharacterized protein OS=Methanococcus maripaludis (strain S2 / LL) OX=267377 GN=MMP0287 PE=4 SV=1								2	2	2	13.6	13.6	13.6	29.901	0	5.3739	273880000	3	14.5555	14.629	15.4318	16.2238	15.9789	16.3873	16.2165	15.725	16.138	15.9155	15.4297	14.7869	14.915	14.8166	15.2743	14.7055	15.2803	15.3522	14.7296	14.9781
Q6LYD7	+	4.45697	-1.29732		0.185989	-0.160055		H(2)/formate:CoB-CoM heterodisulfide,ferredoxin reductase subunit C2 OS=Methanococcus maripaludis (strain S2 / LL) OX=267377 GN=hdrC2 PE=1 SV=1								12	12	12	60.3	60.3	60.3	20.452	0	48.803	10559000000	28	19.9833	20.4076	20.4978	21.7179	21.6352	21.4992	21.8164	21.4876	21.4049	21.3423	21.407	22.2433	22.3219	22.5267	22.1489	22.7069	22.2261	21.3856	21.9108	22.1245
Q6M0B8	+	3.23217	-1.38631		0.807883	-0.193876		UDPG_MGDP_dh_C domain-containing protein OS=Methanococcus maripaludis (strain S2 / LL) OX=267377 GN=MMP0353 PE=3 SV=1								2	2	2	4.4	4.4	4.4	47.614	0	4.4827	118480000	3	13.8693	13.8098	14.3731	16.0284	15.1593	15.1984	15.5516	15.3105	15.174	15.117	17.4827	17.6338	17.8259	17.9235	17.8958	18.0344	17.919	17.5577	17.7178	17.7576
Q6LY57	+	3.57384	-1.39448		1.36836	-0.656526		Flavodoxin-like domain-containing protein OS=Methanococcus maripaludis (strain S2 / LL) OX=267377 GN=MMP1134 PE=4 SV=1								28	28	3	71.3	71.3	10.1	45.638	0	195.15	90834000000	159	23.6327	23.1863	22.8461	24.8539	24.2245	24.581	24.6298	24.5296	24.8782	24.3336	24.0131	22.8926	23.5489	24.4421	24.1562	23.8205	24.4595	23.9101	24.06	24.0419
Q6LY56	+	2.87249	-1.42176		0.38182	-0.211404		Flavodoxin-like domain-containing protein OS=Methanococcus maripaludis (strain S2 / LL) OX=267377 GN=MMP1135 PE=4 SV=1								26	1	1	63.1	1.7	1.7	45.551	0.0079523	2.4827	2865800000	3	20.0015	19.1111	19.193	20.7666	20.4065	20.966	21.3914	20.6139	20.9974	20.5809	17.4402	16.5467	16.9194	17.4403	17.3781	16.8018	17.4744	16.882	17.1043	16.9342
Q6LXY2	+	2.69174	-1.43066		2.14005	-0.954316		Uncharacterized protein OS=Methanococcus maripaludis (strain S2 / LL) OX=267377 GN=MMP1212 PE=4 SV=1								18	18	18	41.6	41.6	41.6	41.452	0	81.411	11282000000	52	20.391	20.5146	21.1539	21.9689	22.4061	22.7181	21.4466	22.1304	22.0329	21.8706	20.5915	20.3901	21.42	21.9048	21.879	22.0222	21.8379	21.4013	21.484	21.5239
Q6LZ09	+	2.3592	-1.54999		1.69098	-0.748079		Coenzyme F420-reducing hydrogenase subunit alpha OS=Methanococcus maripaludis (strain S2 / LL) OX=267377 GN=frcA PE=3 SV=1								24	24	24	57.1	57.1	57.1	45.683	0	136.69	43000000000	90	21.3115	22.5655	20.6962	22.9948	23.0346	23.4265	22.9854	22.978	23.027	22.7665	22.1269	22.8389	21.8165	23.0953	23.1623	22.5	23.0644	23.0317	23.1993	22.8722
Q6LZ12	+	2.14146	-1.55728		1.37664	-0.533581		Coenzyme F420-reducing hydrogenase subunit beta OS=Methanococcus maripaludis (strain S2 / LL) OX=267377 GN=frcB PE=4 SV=1								13	13	9	50	50	43.6	30.886	0	48.809	22677000000	48	20.831	22.0502	19.9875	22.3968	22.4633	22.971	22.3248	22.4162	22.509	22.2308	21.6656	22.3224	21.6596	22.512	22.5909	21.8843	22.5028	22.4295	22.5772	22.2668
Q6M022	+	2.38853	-1.70098		0.999475	-0.905351		Nitro_FeMo-Co domain-containing protein OS=Methanococcus maripaludis (strain S2 / LL) OX=267377 GN=MMP0451 PE=4 SV=1								2	2	2	20.2	20.2	20.2	12.891	0	9.0986	95130000	2	14.5276	13.7239	14.1866	15.5514	15.5773	17.0835	15.378	15.9083	15.5835	15.6888	15.3429	16.4187	16.2543	16.0268	17.5296	17.2685	15.9755	17.3894	17.274	16.8487
Q6LWP2	+	2.7152	-1.77361		0.177222	-0.359347		Flagellin OS=Methanococcus maripaludis (strain S2 / LL) OX=267377 GN=flaB2 PE=3 SV=1								6	6	6	63	63	63	22.473	0	55.415	1064900000	29	15.8535	15.8024	15.5843	18.0355	17.547	16.7517	18.3117	17.5653	16.9109	17.2806	19.0875	17.3243	17.8717	19.9408	17.4419	17.6845	19.9542	18.3055	17.3959	18.651
Q6LWP1	+	2.54344	-2.13791		0.15336	-0.323826		Flagellin OS=Methanococcus maripaludis (strain S2 / LL) OX=267377 GN=flaB3 PE=3 SV=1								4	4	4	37.6	37.6	37.6	22.078	0	24.503	881160000	10	14.9116	14.7124	13.653	16.9652	16.5208	15.687	17.519	16.7513	15.9382	16.2432	17.8012	15.7118	16.3686	18.4757	16.2326	16.0781	18.3263	16.8601	15.7335	16.9879
Q6LWP3	+	3.04715	-2.38807		0.213048	-0.554552		Flagellin OS=Methanococcus maripaludis (strain S2 / LL) OX=267377 GN=flaB1 PE=1 SV=1								5	5	5	38.8	38.8	38.8	27.747	0	29.341	2231300000	16	17.0177	17.5411	16.7201	20.0704	19.3734	18.6708	20.4167	19.5009	18.8541	19.2968	19.0212	16.8688	17.6291	20.2692	16.448	17.613	20.3604	18.35	17.3248	18.8236
Q6LXP8		0.749869	0.533967	+	3.38829	2.22015		Formate transporter OS=Methanococcus maripaludis (strain S2 / LL) OX=267377 GN=fdhC PE=4 SV=1								6	6	6	27	27	27	28.762	0	33.628	3259600000	22	18.1357	18.6468	17.8321	18.336	17.4737	16.8574	17.4781	18.1803	17.7	17.8911	21.9367	21.8943	21.1969	19.6334	19.1672	19.3772	19.2149	20.4222	18.9199	20.6279
Q6LXP7		0.351915	0.385127	+	2.47332	1.26707		Uncharacterized protein OS=Methanococcus maripaludis (strain S2 / LL) OX=267377 GN=MMP1302 PE=4 SV=1								5	5	5	42	42	42	8.5918	0	10.52	2021000000	7	18.3487	18.8148	17.7123	18.5265	17.5843	16.8049	17.5341	18.3961	18.595	18.1081	20.2572	20.2455	19.9249	18.7704	18.7138	18.7904	18.8029	19.787	18.3885	19.4111
P0C1V5		0.471694	0.350423	+	2.15927	-2.09311		F420-non-reducing hydrogenase vhu subunit U OS=Methanococcus maripaludis (strain S2 / LL) OX=267377 GN=vhuU PE=3 SV=2								1	1	1	20.5	20.5	20.5	5.0828	0.0031217	3.2941	261170000	2	16.837	16.9514	16.3096	16.3176	17.1468	16.8071	15.7772	16.0142	16.0306	16.6462	14.6241	14.8487	15.1899	16.9884	16.5311	15.5373	18.2753	17.3199	17.2321	16.7678
Q6LZE0		0.279614	0.249581	+	3.04313	-1.11974		Xanthine/uracil permease family OS=Methanococcus maripaludis (strain S2 / LL) OX=267377 GN=MMP0689 PE=4 SV=1								1	1	1	1.8	1.8	1.8	45.272	0.0097561	2.2919	98236000	2	16.9389	17.2152	17.5734	16.5198	17.4436	17.9542	16.4822	16.6275	16.9303	17.0961	15.1781	15.7542	15.5588	16.3866	16.9939	16.2599	16.7316	16.4798	16.8489	16.434
Q6LWL4		0.362519	0.240779	+	2.26026	-1.15867		Oxidored_q6 domain-containing protein OS=Methanococcus maripaludis (strain S2 / LL) OX=267377 GN=vhuG PE=4 SV=1								10	10	10	43.4	43.4	43.4	30.745	0	44.188	2785900000	18	19.4786	19.3386	19.295	18.989	19.8159	19.6503	18.7069	18.8919	18.7258	19.2397	18.4524	19.0009	18.8926	19.6757	19.7824	19.2808	20.5622	20.1038	20.2387	19.7613
Q6LWL5		0.429695	0.221691	+	2.7652	-1.30063		F420-non-reducing hydrogenase subunit alpha OS=Methanococcus maripaludis (strain S2 / LL) OX=267377 GN=vhuA PE=4 SV=1								19	19	19	59.3	59.3	59.3	45.597	0	82.348	6397000000	35	21.5139	21.6208	21.2754	20.9957	21.8804	21.4751	21.0829	21.1925	20.8636	21.2897	19.2759	19.481	19.9203	20.604	20.7999	20.2913	21.3876	20.9191	21.1566	20.5326
Q6LX12		0.825924	0.20214	+	3.74627	-1.29798		Conserved hypothetical archaeal protein OS=Methanococcus maripaludis (strain S2 / LL) OX=267377 GN=MMP1541 PE=4 SV=1								1	1	1	11.4	11.4	11.4	11.442	0.0010672	3.634	215120000	6	17.3916	17.7496	17.4205	17.1987	17.4654	17.3361	17.2225	17.1293	17.5586	17.3927	17.3765	17.5826	17.4813	18.6376	18.9655	18.3137	19.0961	18.6566	18.9991	18.5315
Q6LWU9		0.811358	-0.226698	+	2.25247	1.1775		Pyruvate kinase OS=Methanococcus maripaludis (strain S2 / LL) OX=267377 GN=MMP1605 PE=3 SV=1								2	2	2	4	4	4	50.143	0.0010526	3.3954	164740000	4	16.361	16.1703	16.6679	16.5276	16.4912	16.9091	16.6898	16.7083	16.4327	16.4985	15.8639	16.8865	15.8085	14.9037	15.0019	14.9109	14.8434	15.6403	14.7526	15.4767
Q6M0J8		0.885938	-0.278066	+	2.53278	-1.04924		ABC transporter domain-containing protein OS=Methanococcus maripaludis (strain S2 / LL) OX=267377 GN=MMP0272 PE=4 SV=1								3	3	3	16	16	16	29.112	0	14.689	88127000	4	15.0098	14.861	14.7051	15.3114	15.4158	14.7077	15.2074	15.1878	14.9901	15.164	12.4624	12.1821	12.547	13.5692	13.2243	13.2854	14.0332	13.6099	12.9564	13.2643
Q6M153		0.785863	0.498975		0.168651	0.136735		Nitrogen regulatory protein P-II OS=Methanococcus maripaludis (strain S2 / LL) OX=267377 GN=glnK1 PE=3 SV=1								4	4	4	44.6	44.6	44.6	12.393	0	12.691	610440000	9	18.9404	18.7424	19.0463	17.6967	18.1906	19.2207	18.5573	18.6794	18.1198	18.6599	18.6896	18.9038	17.933	17.9915	18.5246	17.7874	18.4517	18.9533	18.5239	18.4577
Q6LY42		0.690271	0.473981		0.658521	0.129621		Coenzyme B12-binding:Cobalamin-dependent methionine synthase, B12-binding OS=Methanococcus maripaludis (strain S2 / LL) OX=267377 GN=mtbC PE=4 SV=1								7	7	7	49.8	49.8	49.8	23.661	0	36.985	979700000	10	20.7081	20.4969	21.2549	20.2863	20.466	20.951	20.8351	19.8289	19.7084	20.5042	17.7155	17.3383	17.505	17.5245	17.3879	17.369	17.4893	17.3451	17.2241	17.3958
Q6LX62		1.00207	0.440123		0.893335	0.190122		L-seryl-tRNA(Sec) kinase OS=Methanococcus maripaludis (strain S2 / LL) OX=267377 GN=pstK PE=3 SV=1								2	2	2	9.4	9.4	9.4	29.776	0	8.6874	263160000	3	16.2695	16.3746	16.6817	15.4721	15.9835	16.3972	15.9794	16.4119	15.7668	16.0488	15.3845	15.3089	15.1893	15.2456	15.3644	15.1204	14.9465	15.0159	14.9319	15.144
Q6LWL2		0.860467	0.436105		0.235407	0.222992		H(2)/formate:CoB-CoM heterodisulfide,ferredoxin reductase subunit A OS=Methanococcus maripaludis (strain S2 / LL) OX=267377 GN=hdrA PE=1 SV=2								21	21	21	33.9	33.9	33.9	71.28	0	100.23	6392300000	43	21.5319	21.5939	21.2243	20.9872	21.7045	21.1584	20.6506	21.0573	20.5254	21.1553	20.5553	21.0599	20.8521	20.5955	20.321	19.6661	21.4519	21.1098	20.4524	20.7103
Q6LXX5		0.682181	0.424466		0.860127	0.22817		Glycogen phosphorylase OS=Methanococcus maripaludis (strain S2 / LL) OX=267377 GN=glgP PE=4 SV=1								1	1	1	1.9	1.9	1.9	60.19	0.0030896	3.1237	72106000	2	13.9216	13.6215	13.8724	12.7771	13.6234	14.1306	12.866	13.4499	13.4373	13.5375	13.9916	13.8077	13.621	13.4542	13.6977	13.8661	13.4205	13.6686	13.3645	13.6277
Q6M0G6		1.03719	0.401733		0.0539795	0.0473539		Oxidoreductase family member subunit beta OS=Methanococcus maripaludis (strain S2 / LL) OX=267377 GN=MMP0305 PE=4 SV=1								2	2	2	7	7	7	31.937	0	7.1377	122520000	4	15.841	15.7133	15.5388	15.0145	15.1241	15.7964	15.0007	15.6062	15.2339	15.5639	16.3094	16.3944	15.3529	15.4742	16.2211	15.8369	15.7071	16.4883	16.1015	16.1357
Q6LZI9		1.38299	0.399917		1.647	0.328558		Inhibitor_I42 domain-containing protein OS=Methanococcus maripaludis (strain S2 / LL) OX=267377 GN=MMP0638 PE=4 SV=1								5	5	5	9.1	9.1	9.1	84.573	0	15.126	174860000	8	15.4558	15.7039	15.4867	15.1624	14.7672	15.4385	14.9368	15.3521	15.2363	15.4072	17.6733	17.4592	17.1921	17.0321	17.2105	17.0144	16.9908	17.2045	17.2255	17.1403
Q6LX74		1.20942	0.399023		2.46944	0.304395		GATase cobBQ-type domain-containing protein OS=Methanococcus maripaludis (strain S2 / LL) OX=267377 GN=cbiA PE=4 SV=1								1	1	1	3.4	3.4	3.4	39.412	0.0010616	3.5925	28692000	2	14.1603	13.6767	14.0732	13.7013	13.4982	13.2583	13.5323	13.9956	13.4407	14.0212	14.7989	14.7806	14.5614	14.3715	14.3877	14.4182	14.416	14.5554	14.3067	14.6419
Q6M062		1.72701	0.390297		1.86827	0.183109		Conserved hypothetical archaeal protein OS=Methanococcus maripaludis (strain S2 / LL) OX=267377 GN=MMP0409 PE=4 SV=1								5	5	5	17.6	17.6	17.6	42.656	0	14.632	103930000	6	14.476	14.3891	14.446	13.6909	14.0097	14.0576	14.3177	14.1987	14.0057	14.3627	16.1314	16.2973	16.2531	16.0765	16.1237	16.1335	15.9734	15.9742	15.9835	16.0179
Q6LWM2		1.05343	0.382531		1.87909	0.515386		2-oxoglutarate ferredoxin oxidoreductase, delta (Ferredoxin) subunit OS=Methanococcus maripaludis (strain S2 / LL) OX=267377 GN=korD PE=4 SV=1								2	2	2	17.6	17.6	17.6	7.7089	0.0010638	3.6014	27528000	2	15.3859	15.3355	15.5243	14.8506	15.4264	15.3633	14.617	14.8553	15.0836	15.2342	13.7306	13.6521	13.8547	13.2286	13.5418	13.3918	13.0911	12.8154	13.3139	12.9545
Q6LZA6		1.02348	0.371991		0.108648	0.0782512		Uncharacterized protein OS=Methanococcus maripaludis (strain S2 / LL) OX=267377 GN=MMP0723 PE=4 SV=1								5	5	5	55.3	55.3	55.3	13.009	0	20.486	852980000	9	19.0985	18.9233	19.2477	18.3647	18.6387	19.1996	18.4489	18.7682	18.8872	18.8976	18.72	18.148	17.7884	17.7853	18.3167	17.6714	18.2022	18.5046	18.363	18.1735
Q6LZS5		0.872136	0.362817		0.187388	0.0362832		DUF523 domain-containing protein OS=Methanococcus maripaludis (strain S2 / LL) OX=267377 GN=MMP0549 PE=4 SV=1								6	6	6	33.5	33.5	33.5	20.794	0	17.841	556330000	10	18.402	18.4712	18.3053	17.7717	18.0962	18.7168	17.8203	17.8597	17.9155	18.1935	18.533	18.8334	18.6989	18.6735	18.7217	18.5515	18.7448	18.6781	18.5432	18.6297
Q6M0Y8		1.53997	0.3623		0.353603	-0.113213		Fumerase domain-containing protein OS=Methanococcus maripaludis (strain S2 / LL) OX=267377 GN=fumA PE=4 SV=1								2	2	2	8.9	8.9	8.9	30.261	0	5.7216	60483000	3	15.3303	15.207	15.2968	15.1396	14.9939	15.0049	14.7145	14.5824	15.0589	15.2312	13.8808	14.5563	14.0887	14.1416	14.3272	14.2525	14.3272	14.3604	14.322	14.4741
Q6M0Z7		2.40595	0.358986		0.139373	0.161745		Uncharacterized protein OS=Methanococcus maripaludis (strain S2 / LL) OX=267377 GN=MMP0121 PE=4 SV=1								3	3	3	27.6	27.6	27.6	11.645	0	5.6753	86550000	3	16.3678	16.2273	16.2272	15.7103	15.9059	16.0873	16.0171	15.8396	15.9306	16.0132	15.7741	14.987	14.8575	16.2477	14.8686	14.4649	15.3891	14.6717	14.6248	14.8119
Q6LZS9		1.68069	0.352736		0.0843968	0.0209595		Radical_SAM domain-containing protein OS=Methanococcus maripaludis (strain S2 / LL) OX=267377 GN=MMP0544 PE=4 SV=1								4	4	3	11.9	11.9	7.4	37.919	0	6.7676	14358000	3	15.7061	15.638	15.5488	15.2729	15.1737	15.3562	14.9556	15.4296	15.4813	15.4419	16.4146	16.5287	16.7199	16.5314	16.5289	16.6755	16.6418	16.463	16.3601	16.6019
Q6LZ92		3.07654	0.351428		0.0222386	0.00343513		L-aspartate dehydrogenase OS=Methanococcus maripaludis (strain S2 / LL) OX=267377 GN=nadX PE=3 SV=1								5	5	5	26.2	26.2	26.2	28.593	0	18.441	267470000	8	17.3432	17.2356	17.2331	16.9991	16.8332	17.0508	16.9153	16.9263	16.7904	17.106	16.5715	16.7091	16.676	16.6901	16.7049	16.736	16.6254	16.5299	16.6063	16.7705
Q6LY41		1.24118	0.34896		0.634399	-0.202748		Conserved hypothetical archaeal protein OS=Methanococcus maripaludis (strain S2 / LL) OX=267377 GN=MMP1152 PE=4 SV=1								2	2	2	30.8	30.8	30.8	13.489	0	15.102	254620000	4	16.9285	17.0593	17.439	16.5685	16.9222	16.657	16.9886	16.9926	16.6309	16.8882	16.4946	16.9722	17.1889	17.1361	17.0204	17.0573	17.2431	16.8832	17.1878	16.908
Q6LY82		1.75394	0.347989		0.301279	-0.0906747		Uncharacterized protein OS=Methanococcus maripaludis (strain S2 / LL) OX=267377 GN=MMP1109 PE=4 SV=1								1	1	1	2.4	2.4	2.4	41.707	0.0031513	3.3501	80177000	2	14.5117	14.5644	14.6376	14.1214	14.4982	14.3886	14.0054	14.1929	14.133	14.098	14.7411	14.6622	14.4984	14.6108	14.6364	14.5151	14.9009	15.0335	14.6506	14.5756
Q6LZC4		2.8498	0.347231		1.18202	0.439355		UDP-N-acetylglucosamine 2-epimerase OS=Methanococcus maripaludis (strain S2 / LL) OX=267377 GN=wecB PE=1 SV=1								1	1	1	4.1	4.1	4.1	41.355	0	4.2261	42182000	2	15.3353	15.2369	15.2355	14.8648	15.0286	14.7308	14.9531	14.9891	14.9654	15.0493	15.8003	15.6073	15.1063	15.1556	15.3569	14.6425	14.9451	15.2273	15.0642	15.0501
Q6M0Z6		3.09038	0.34608		0.150548	-0.0293802		Uncharacterized protein OS=Methanococcus maripaludis (strain S2 / LL) OX=267377 GN=MMP0122 PE=4 SV=1								7	7	7	31.1	31.1	31.1	34.271	0	55.836	577960000	12	17.4786	17.571	17.3459	17.1362	17.0674	17.1823	17.0367	17.2253	17.0666	17.2088	18.4875	18.4543	18.2402	18.2922	18.5256	18.3597	18.3876	18.4594	18.5158	18.4039
Q6LYQ2		1.55638	0.345724		0.437585	0.100441		Shikimate dehydrogenase (NADP(+)) OS=Methanococcus maripaludis (strain S2 / LL) OX=267377 GN=aroE PE=3 SV=1								4	4	4	17.3	17.3	17.3	30.78	0	8.3972	160640000	6	17.4863	17.5433	17.2258	16.9488	17.1927	17.3695	17.0185	17.0304	16.8764	17.2767	16.8364	17.0356	17.0954	16.8138	17.0989	17.0425	16.7987	16.7102	16.868	16.8849
Q6LZA8		0.562114	0.334726		0.122158	-0.101377		Ferredoxin OS=Methanococcus maripaludis (strain S2 / LL) OX=267377 GN=MMP0721 PE=4 SV=1								5	5	5	26.1	26.1	26.1	24.652	0	14.365	660930000	8	18.6656	17.9249	18.8005	17.9101	18.0445	18.6635	17.597	18.2621	18.2965	18.2865	18.1321	17.8432	17.1465	17.3483	18.1798	17.2667	17.8217	18.0283	18.2069	17.767
Q6M0E6		1.78618	0.332115		0.101713	0.0348091		Glyceraldehyde-3-phosphate dehydrogenase OS=Methanococcus maripaludis (strain S2 / LL) OX=267377 GN=gap PE=3 SV=1								13	13	13	45.3	45.3	45.3	37.269	0	45.767	5682000000	32	20.1679	20.1346	20.3145	19.7819	19.895	19.743	19.8467	20.1944	19.7805	19.9265	21.0507	21.2025	20.6881	20.9559	21.0732	20.7753	20.85	21.114	20.9054	20.9372
Q6M1B5		0.850876	0.331429		0.0291956	0.00835609		Conserved archaeal protein OS=Methanococcus maripaludis (strain S2 / LL) OX=267377 GN=MMP0001 PE=4 SV=1								2	2	2	20.4	20.4	20.4	10.628	0.0010834	3.9343	262880000	3	16.5515	16.5763	16.3103	15.9389	16.0349	16.4197	15.6595	16.3936	16.4412	16.173	17.9122	17.9065	17.8249	17.6567	17.9755	17.8885	17.6877	18.0235	18.0051	17.8954
Q6LY54		1.63937	0.328292		0.33147	-0.0992139		HTH asnC-type domain-containing protein OS=Methanococcus maripaludis (strain S2 / LL) OX=267377 GN=MMP1137 PE=4 SV=1								7	7	7	35	35	35	15.925	0	20.689	2218000000	18	19.9122	19.6613	19.7978	19.2599	19.4465	19.7127	19.3258	19.6135	19.4143	19.5969	20.3235	19.8139	20.1912	20.0133	20.2751	20.1151	20.2837	20.3928	20.1724	20.1586
Q6M0H7		1.21903	0.327498		0.443468	-0.180095		Uncharacterized protein OS=Methanococcus maripaludis (strain S2 / LL) OX=267377 GN=MMP0293 PE=4 SV=1								9	9	9	35.1	35.1	35.1	33.941	0	24.422	511950000	11	18.5283	18.2721	18.2086	17.7633	17.9597	18.4136	17.8896	17.9804	18.0463	18.1	18.9904	18.9843	18.3629	18.9201	19.1559	18.668	18.7736	19.1587	19.0797	18.8948
Q6LYS2		1.36135	0.327234		0.031221	-0.0087595		PRC domain-containing protein OS=Methanococcus maripaludis (strain S2 / LL) OX=267377 GN=MMP0916 PE=4 SV=1								4	4	4	76.8	76.8	76.8	8.882	0	30.669	6115400000	11	17.2096	17.3361	17.4344	17.2856	16.9026	17.0874	16.6686	16.947	17.1056	17.0324	18.9885	18.9627	18.7383	19.0337	18.8123	18.7176	19.084	18.8653	18.9186	18.9059
Q6LX89		1.71767	0.318733		0.543565	0.200308		Polyferredoxin OS=Methanococcus maripaludis (strain S2 / LL) OX=267377 GN=ehaP PE=4 SV=1								5	5	5	11.7	11.7	11.7	44.349	0	12.787	436000000	9	17.0612	17.0335	17.0267	16.6273	16.5002	16.6733	16.6643	16.9626	16.9027	16.917	17.4314	17.2451	17.0638	16.8208	17.378	17.2787	17.0497	17.0763	16.6751	17.1096
P62357		1.28322	0.31838		0.236179	-0.0470804		1-(5-phosphoribosyl)-5-[(5-phosphoribosylamino)methylideneamino] imidazole-4-carboxamide isomerase OS=Methanococcus maripaludis (strain S2 / LL) OX=267377 GN=hisA PE=3 SV=1								4	4	4	16.2	16.2	16.2	26.204	0	10.03	118900000	6	16.6922	16.3108	16.8758	16.194	16.4649	16.4561	16.3213	16.2862	16.1248	16.4771	16.8911	17.0229	17.1931	16.9925	17.1529	17.1061	16.9792	17.2258	17.0399	16.9998
Q6M0W4		1.75955	0.317439		0.394752	-0.0870129		UPF0288 protein MMP0154 OS=Methanococcus maripaludis (strain S2 / LL) OX=267377 GN=MMP0154 PE=3 SV=1								15	15	15	36.7	36.7	36.7	56.345	0	52.742	1248900000	24	19.8723	19.8341	20.0687	19.4466	19.6741	19.8333	19.4369	19.6731	19.5816	19.7347	19.4895	19.3961	19.2484	19.2953	19.5871	19.4016	19.3288	19.5279	19.6493	19.4561
Q6LXH0		2.15204	0.316887		0.159494	0.057882		Beta-lactamase-like:ATP/GTP-binding site motif A (P-loop) OS=Methanococcus maripaludis (strain S2 / LL) OX=267377 GN=MMP1381 PE=4 SV=1								6	6	6	20.6	20.6	20.6	46.853	0	16.261	324440000	11	17.0004	16.7997	16.9859	16.5617	16.7428	16.7156	16.6672	16.5686	16.4148	16.7339	17.2739	17.3391	17.8259	17.3738	17.3937	17.6922	17.4172	17.3317	17.3219	17.4746
Q6M165		2.93952	0.315697		0.228041	0.0410741		Uncharacterized protein OS=Methanococcus maripaludis (strain S2 / LL) OX=267377 GN=MMP0052 PE=4 SV=1								11	11	11	39.3	39.3	39.3	33.493	0	39.956	1060300000	20	19.7551	19.963	19.8911	19.5282	19.5738	19.4435	19.5142	19.6511	19.6133	19.65	19.0813	18.8028	18.9699	18.8895	18.828	18.8617	19.0596	18.9536	18.8691	18.9402
Q6LWW2		1.92365	0.308425		0.511493	-0.111179		Tryptophan--tRNA ligase OS=Methanococcus maripaludis (strain S2 / LL) OX=267377 GN=trpS PE=3 SV=1								11	11	11	45.3	45.3	45.3	40.891	0	48.536	953090000	19	19.41	19.2624	19.2285	18.8932	19.2374	18.9101	19.0421	19.0141	18.8543	19.0854	19.1418	19.1775	19.423	19.2475	19.352	19.6294	19.2722	19.3467	19.304	19.2395
Q6LX04		2.05056	0.308201		0.254107	-0.0610717		F420_oxidored domain-containing protein OS=Methanococcus maripaludis (strain S2 / LL) OX=267377 GN=MMP1550 PE=4 SV=1								10	10	10	54.3	54.3	54.3	23.716	0	48.661	2667500000	20	19.6688	19.5732	19.5658	19.1991	19.2554	19.107	19.456	19.4524	19.2965	19.4115	20.0649	19.8446	19.8327	20.149	19.8867	19.8062	20.1537	19.9368	19.9186	19.9334
Q6M131		1.16278	0.307956		2.28699	0.47089		3-hydroxy-3-methylglutaryl coenzyme A reductase OS=Methanococcus maripaludis (strain S2 / LL) OX=267377 GN=hmgA PE=3 SV=1								9	9	9	32.4	32.4	32.4	43.942	0	34.756	488650000	13	18.7111	18.2971	18.8907	18.1397	18.4673	18.4092	18.1528	18.4247	18.3565	18.4085	17.5375	17.1158	17.5237	16.869	16.8523	16.7657	17.1112	16.9051	17.0252	17.0559
Q6LZZ6		1.48523	0.307441		0.798737	0.148191		Uncharacterized protein OS=Methanococcus maripaludis (strain S2 / LL) OX=267377 GN=MMP0477 PE=4 SV=1								2	2	2	29.3	29.3	29.3	9.4126	0	5.8928	8342400	2	11.7863	11.8235	11.5276	11.5063	11.4825	11.3462	11.2304	11.2274	11.6375	11.4225	14.7388	14.894	14.671	14.7014	14.6446	14.6202	14.3472	14.6686	14.7365	14.6315
Q6M096		1.68733	0.306696		0.0281097	0.0164644		TRAM domain-containing protein OS=Methanococcus maripaludis (strain S2 / LL) OX=267377 GN=MMP0375 PE=4 SV=1								2	2	2	4.8	4.8	4.8	51.964	0	5.1049	44825000	3	15.1449	15.0886	15.0971	14.7853	14.8223	15.1156	14.612	14.79	14.696	15.0634	14.9018	14.6765	14.9178	15.3156	14.8705	14.7215	15.0144	14.5749	14.3965	14.6524
Q6M0H8		1.54383	0.303053		0.917387	0.208807		Uncharacterized protein OS=Methanococcus maripaludis (strain S2 / LL) OX=267377 GN=MMP0292 PE=4 SV=1								3	3	3	57.4	57.4	57.4	6.8089	0	19.61	1031000000	13	17.5202	17.5272	17.374	17.0651	17.0174	17.4147	16.9913	17.1969	17.3388	17.2337	18.4728	18.6082	18.1698	18.2038	18.3136	18.0811	18.0578	18.4184	18.1742	18.2598
Q6LX28		3.3255	0.301577		0.202663	-0.0554765		Modulator of DNA gyrase OS=Methanococcus maripaludis (strain S2 / LL) OX=267377 GN=MMP1525 PE=4 SV=1								10	10	10	29	29	29	47.006	0	57.766	898880000	15	19.0995	19.0755	19.0003	18.6837	18.7427	18.8756	18.6728	18.7959	18.7704	18.9446	17.9749	18.2473	18.4572	18.1749	18.2335	18.4648	18.2522	18.3145	18.2519	18.2765
Q6M0L3		3.30877	0.301003		0.524683	-0.10651		TATA-box-binding protein OS=Methanococcus maripaludis (strain S2 / LL) OX=267377 GN=tbp PE=3 SV=1								7	7	7	33.1	33.1	33.1	20.113	0	27.811	2821500000	20	20.9957	20.943	21.0714	20.7298	20.6775	20.8187	20.5998	20.6842	20.704	20.769	20.2743	20.1796	20.0399	20.2587	20.1906	20.0994	20.5122	20.2395	20.3263	20.3768
Q6LXQ3		1.63826	0.300451		0.586412	0.145932		ADP-specific phosphofructokinase OS=Methanococcus maripaludis (strain S2 / LL) OX=267377 GN=pfkC PE=3 SV=1								3	3	3	9.7	9.7	9.7	52.699	0	12.73	84193000	4	16.5973	16.269	16.5892	16.1649	16.0732	16.3909	16.0618	16.1431	16.2744	16.322	15.2157	15.093	14.8204	14.7943	14.9399	14.8648	14.8127	15.185	14.7857	14.8413
Q6LZH0		1.99184	0.295302		0.348533	-0.148146		Elp3 domain-containing protein OS=Methanococcus maripaludis (strain S2 / LL) OX=267377 GN=MMP0658 PE=4 SV=1								15	15	15	52.2	52.2	52.2	33.799	0	97.395	5890600000	30	21.1025	20.9087	21.2667	20.7786	20.9205	20.8088	20.7268	20.8601	20.6892	20.8806	20.9982	20.6666	21.3845	21.1778	20.9234	21.4392	21.3665	21.1192	20.9613	21.1808
Q6LYA0		0.986541	0.288145		0.81097	-0.0898972		UTP--glucose-1-phosphate uridylyltransferase OS=Methanococcus maripaludis (strain S2 / LL) OX=267377 GN=MMP1091 PE=3 SV=1								6	6	6	22.7	22.7	22.7	31.725	0	18.016	701670000	10	17.9	17.949	17.7276	17.8449	17.5821	17.3337	17.2186	17.7583	17.6866	17.5862	18.7255	18.9103	18.7024	18.8127	18.8882	18.8196	18.8438	18.8737	18.9777	18.8032
Q6LY04		2.8437	0.287984		1.45739	-0.559606		Ribose-5-phosphate isomerase A OS=Methanococcus maripaludis (strain S2 / LL) OX=267377 GN=rpiA PE=3 SV=1								7	7	7	28.5	28.5	28.5	25.657	0	23.919	749360000	15	18.7314	18.6135	18.641	18.2192	18.4122	18.3624	18.4562	18.4418	18.3519	18.4615	17.9487	17.3947	18.3587	18.4931	18.4235	18.5797	18.7413	18.2849	18.2394	18.2525
Q6M139		2.34288	0.28543		0.00764818	-0.00388114		PyrE-like protein OS=Methanococcus maripaludis (strain S2 / LL) OX=267377 GN=MMP0079 PE=3 SV=1								5	5	5	32.2	32.2	32.2	22.744	0	24.839	580560000	9	18.5715	18.5635	18.3231	18.2873	18.1302	18.1035	18.182	18.2677	18.233	18.3282	16.9815	17.5942	17.6258	17.5328	17.4678	17.48	17.3586	17.0774	17.5097	17.2845
Q6M071		1.02219	0.284456		0.979553	0.299739		ACT domain-containing protein OS=Methanococcus maripaludis (strain S2 / LL) OX=267377 GN=ehbQ PE=4 SV=1								3	3	3	30	30	30	23.276	0	8.5462	37941000	6	13.5467	13.4756	13.528	13.346	13.3592	13.5777	12.9321	13.1953	12.9837	13.3883	16.3666	16.8001	16.8615	16.5174	16.5886	16.5026	16.4137	16.0949	16.1407	16.3546
Q6M0J3		1.0824	0.283756		0.223089	0.0499902		TraB family OS=Methanococcus maripaludis (strain S2 / LL) OX=267377 GN=MMP0277 PE=4 SV=1								3	3	3	12.4	12.4	12.4	42.01	0	5.0699	179470000	3	17.111	16.9812	16.7428	16.8505	16.5853	16.3505	16.6911	16.907	16.583	16.8256	12.9811	13.0647	13.2647	13.1957	13.2148	12.9903	12.9515	13.0177	12.9509	13.0413
Q6LYG2		1.36427	0.283664		0.0192163	0.00449467		Uncharacterized protein OS=Methanococcus maripaludis (strain S2 / LL) OX=267377 GN=MMP1029 PE=4 SV=1								4	4	4	31.1	31.1	31.1	14.214	0	6.9442	361740000	6	17.8883	17.5651	17.7522	17.365	17.5374	17.6871	17.4018	17.2124	17.5057	17.6593	17.2885	17.272	17.3855	17.3107	17.4929	17.3315	17.3373	17.093	17.2997	17.2348
Q6LWZ4		0.719323	0.282173		0.406126	0.0751673		Tetrahydromethanopterin S-methyltransferase subunit E OS=Methanococcus maripaludis (strain S2 / LL) OX=267377 GN=mtrE PE=3 SV=1								2	2	2	9.4	9.4	9.4	31.079	0	31.39	877980000	16	16.9295	17.4804	17.0329	17.2514	16.8729	16.5914	16.5298	16.977	16.9701	16.9989	17.931	17.844	17.8217	17.8337	17.8011	17.9362	17.619	17.9096	17.6428	17.8972
Q6LY53		1.15317	0.280804		0.208619	0.146137		Hydroxyethylthiazole kinase OS=Methanococcus maripaludis (strain S2 / LL) OX=267377 GN=thiM PE=3 SV=2								4	4	4	18.8	18.8	18.8	28.377	0	22.085	538390000	6	18.867	18.8592	18.6768	18.6629	18.5905	18.7024	18.1352	18.436	18.5943	18.7312	12.3965	11.917	12.6393	12.4778	12.7924	12.1965	11.9962	11.8817	11.6843	11.686
Q6LYR4		2.37678	0.275017		0.131066	-0.0678705		tRNA (pseudouridine(54)-N(1))-methyltransferase OS=Methanococcus maripaludis (strain S2 / LL) OX=267377 GN=trmY PE=3 SV=1								7	7	7	22	22	22	22.86	0	13.221	311900000	10	18.3512	18.2802	18.3259	18.0504	17.9524	18.1749	17.9117	18.1634	18.0116	18.1918	17.3483	16.6306	17.1185	17.2484	16.8254	16.9642	17.4247	17.2227	16.9165	17.2039
Q6LY32		0.748426	0.274755		0.179975	-0.209339		DrsE domain-containing protein OS=Methanococcus maripaludis (strain S2 / LL) OX=267377 GN=MMP1161 PE=4 SV=1								7	7	7	44.8	44.8	44.8	13.344	0	13.963	2345200000	11	19.8718	19.5509	19.7701	18.9759	19.2995	19.6382	19.4158	19.6479	19.7597	19.6243	20.3164	19.7701	18.766	19.2435	20.2044	19.1225	19.6702	20.5985	20.122	19.8644
Q6M0Y5		0.90559	0.273584		0.473352	0.140334		Inosine-5-monophosphate dehydrogenase OS=Methanococcus maripaludis (strain S2 / LL) OX=267377 GN=guaB PE=3 SV=1								21	21	21	54.6	54.6	54.6	53.683	0	151.09	3776000000	43	20.899	20.6284	20.7619	20.4276	20.6789	20.8388	20.3999	20.4725	20.1193	20.5918	19.9689	20.3849	20.3049	20.1893	19.864	20.2534	20.2476	19.8714	20.0497	20.0933
Q6LX81		0.377714	0.273435		1.26878	-0.45157		Uncharacterized protein MMP1471 OS=Methanococcus maripaludis (strain S2 / LL) OX=267377 GN=MMP1471 PE=3 SV=1								1	1	1	2.9	2.9	2.9	40.328	0.0050761	2.8003	33605000	2	11.3687	11.809	11.2538	10.7423	10.9834	12.0173	10.999	11.6148	10.8654	11.3201	12.5602	12.5468	12.6956	13.0866	13.466	12.522	13.2558	13.0853	12.899	13.0488
Q6M0Z5		1.38311	0.27339		2.06992	0.249646		Formate-dependent phosphoribosylglycinamide formyltransferase OS=Methanococcus maripaludis (strain S2 / LL) OX=267377 GN=purT PE=3 SV=1								12	12	12	38.9	38.9	38.9	42.907	0	80.133	1548300000	21	19.402	19.1009	19.3929	18.8537	19.1035	18.8524	19.0587	19.2311	19.0519	19.1129	19.1922	19.2784	19.0366	18.9414	18.8686	18.8005	18.9198	18.928	19.0582	18.9252
Q6LX90		1.55879	0.268381		0.201983	0.080231		Energy conserving hydrogenase A large subunit OS=Methanococcus maripaludis (strain S2 / LL) OX=267377 GN=ehaO PE=4 SV=1								10	10	9	31.5	31.5	27.7	42.88	0	22.641	679920000	12	18.4622	18.5406	18.3173	18.1078	18.0365	18.1159	18.211	18.4457	18.113	18.2408	18.4635	18.4253	18.1611	18.152	18.5655	18.5465	17.9804	18.2912	18.0828	18.1738
Q6LX99		1.24163	0.265145		0.385547	-0.162944		Uncharacterized protein OS=Methanococcus maripaludis (strain S2 / LL) OX=267377 GN=ehaF PE=4 SV=1								1	1	1	6.4	6.4	6.4	17.589	0.0079208	2.4608	30624000	3	13.9255	14.0465	13.9267	13.6106	13.6133	13.5263	13.7435	14.062	13.6508	13.6925	13.5685	13.5674	13.1085	13.0775	13.7106	13.7395	13.4923	13.763	13.6836	13.494
Q6M084		1.02038	0.263964		0.22392	-0.123059		Microsomal signal peptidase 21 KD subunit OS=Methanococcus maripaludis (strain S2 / LL) OX=267377 GN=MMP0387 PE=4 SV=1								5	5	5	30	30	30	24.012	0	31.367	349970000	7	16.7834	16.8878	16.7603	16.2517	16.5773	16.8481	16.3434	16.7288	16.5297	16.66	17.6076	17.6084	17.2022	17.3174	17.5019	17.4141	17.3878	18.2311	17.7225	17.8032
Q6M105		0.710258	0.259079		0.103836	-0.029912		Uncharacterized protein OS=Methanococcus maripaludis (strain S2 / LL) OX=267377 GN=MMP0113 PE=4 SV=1								7	7	7	32.3	32.3	32.3	31.451	0	37.603	378650000	13	18.954	18.5433	18.7377	18.1457	18.667	18.9225	18.3198	18.4238	18.4369	18.6802	18.6543	18.2975	18.2591	18.4796	18.3837	18.3304	18.5116	18.302	18.5941	18.4024
P0CW69		1.91774	0.255213		0.257074	0.0697568		UPF0212 protein MMP1509 OS=Methanococcus maripaludis (strain S2 / LL) OX=267377 GN=MMP1509 PE=3 SV=1								5	5	5	49.6	49.6	49.6	12.049	0	28.53	900860000	8	19.5553	19.7632	19.7121	19.6096	19.4364	19.2803	19.3826	19.4101	19.4111	19.5361	18.4942	18.6705	18.7685	18.6935	18.3817	18.6917	18.6286	18.3468	18.7057	18.6438
Q6LXN9		1.14106	0.250917		1.80886	0.133978		IMP cyclohydrolase OS=Methanococcus maripaludis (strain S2 / LL) OX=267377 GN=purO PE=3 SV=1								10	10	10	55.7	55.7	55.7	22.582	0	46.786	2434600000	23	20.5637	20.3493	20.1963	19.9669	20.2041	20.3837	20.0294	20.1497	19.9793	20.2406	20.1401	20.174	20.2062	20.0101	20.0277	20.1189	20.0276	20.1126	19.94	20.0271
Q6LWW0		1.16454	0.247418		0.110196	0.0342258		Uncharacterized protein OS=Methanococcus maripaludis (strain S2 / LL) OX=267377 GN=MMP1594 PE=4 SV=1								2	2	2	12.2	12.2	12.2	21.67	0	6.5664	157760000	3	15.947	15.7102	16.0556	15.4362	15.6481	15.8519	15.7507	15.7397	15.5144	15.5786	15.658	15.6363	16.0042	15.6893	15.8072	15.7998	15.8252	15.4583	15.8118	15.7752
Q6M0I9		0.920547	0.244339		0.838487	-0.260536		Hypothetical nucleotide binding protein OS=Methanococcus maripaludis (strain S2 / LL) OX=267377 GN=MMP0281 PE=4 SV=1								17	17	17	37.1	37.1	37.1	70.76	0	78.698	1324100000	30	18.9347	18.9985	19.2509	18.7357	18.9411	19.1721	18.6594	18.7647	18.6291	18.9152	19.5657	18.926	19.1284	19.273	19.644	19.3567	19.3363	19.5348	19.6587	19.3619
Q6LZF2		2.22451	0.242949		0.829362	-0.313656		Uncharacterized protein OS=Methanococcus maripaludis (strain S2 / LL) OX=267377 GN=MMP0677 PE=4 SV=1								4	4	4	25.9	25.9	25.9	17.504	0	12.388	609250000	9	17.3928	17.6657	17.6246	17.3502	17.3593	17.3164	17.2658	17.2555	17.3615	17.34	17.949	18.044	18.117	18.5247	18.0868	18.8209	18.5259	18.0664	18.0773	18.2573
Q6M1A0		0.551622	0.242286		1.1282	0.67844		Uncharacterized protein OS=Methanococcus maripaludis (strain S2 / LL) OX=267377 GN=MMP0017 PE=4 SV=1								1	1	1	3.1	3.1	3.1	39.745	0.0030864	3.0942	58403000	2	13.6026	13.857	13.5085	13.6143	13.5127	13.9206	13.064	13.1456	13.2253	13.235	16.3524	17.4137	16.1747	16.1477	16.2986	15.927	15.4385	16.2688	15.7302	16.3193
Q6M078		1.95297	0.241517		0.222698	-0.0682395		Phosphoesterase OS=Methanococcus maripaludis (strain S2 / LL) OX=267377 GN=MMP0393 PE=3 SV=1								5	5	5	37.4	37.4	37.4	19.438	0	21.134	600970000	9	17.5378	17.427	17.4243	17.1335	17.3004	17.0561	17.3212	17.3196	17.1984	17.1592	17.1241	17.2471	16.7306	17.1126	17.3067	17.063	16.955	17.045	17.1305	16.9168
Q6M0P0		1.27202	0.237983		0.71119	0.107931		HD domain-containing protein OS=Methanococcus maripaludis (strain S2 / LL) OX=267377 GN=MMP0230 PE=4 SV=1								2	2	2	9.6	9.6	9.6	26.006	0	5.376	35641000	3	14.3679	14.1513	14.157	13.9628	13.8432	14.0827	14.0808	14.1744	13.7806	14.0336	16.2975	16.203	16.1042	16.1687	15.9012	16.0817	16.1284	16.0633	16.2186	16.1781
P62454		1.6752	0.235688		1.09825	-0.0949825		Imidazole glycerol phosphate synthase subunit HisF OS=Methanococcus maripaludis (strain S2 / LL) OX=267377 GN=hisF PE=3 SV=1								8	8	8	26.5	26.5	26.5	29.96	0	24.018	380580000	13	17.1667	16.9051	16.7986	16.7123	16.7339	16.8106	16.7355	16.63	16.7042	16.8314	17.4328	17.2629	17.3241	17.411	17.475	17.3351	17.4792	17.44	17.4692	17.3278
Q6LX26		1.69459	0.235592		1.33525	0.368396		LL-diaminopimelate aminotransferase OS=Methanococcus maripaludis (strain S2 / LL) OX=267377 GN=dapL PE=1 SV=1								14	14	14	37.3	37.3	37.3	46.763	0	51.201	1391300000	23	19.6535	19.4979	19.6495	19.3863	19.4308	19.5008	19.1546	19.3157	19.4	19.4942	19.1337	19.7522	19.2303	19.1058	18.982	18.8018	19.0766	19.1785	18.8774	19.1412
Q6LYN8		0.920469	0.232274		0.256035	-0.117334		Translation initiation factor 5A OS=Methanococcus maripaludis (strain S2 / LL) OX=267377 GN=eif5a PE=3 SV=1								6	6	6	29	29	29	14.324	0	15.722	1535900000	15	19.2708	19.4481	19.4648	19.3727	19.2838	18.7853	19.2516	19.0769	19.2031	19.2682	19.3937	19.5811	20.0022	20.0002	19.6143	20.0648	19.8796	19.4207	19.6782	19.8069
Q6M0D6		0.892924	0.231334		0.528797	-0.0920763		Uncharacterized protein OS=Methanococcus maripaludis (strain S2 / LL) OX=267377 GN=MMP0335 PE=4 SV=1								3	3	3	13.9	13.9	13.9	15.177	0	6.6714	157800000	4	15.8836	15.5529	16.0726	15.6915	15.6893	15.5566	15.7173	15.3204	15.6551	15.7304	18.2881	18.2767	18.0152	18.3585	18.2355	18.1493	18.3394	18.23	18.3997	18.311
Q6LZF7		1.36437	0.229812		0.139254	0.100789		2-dehydropantoate 2-reductase OS=Methanococcus maripaludis (strain S2 / LL) OX=267377 GN=MMP0672 PE=3 SV=1								1	1	1	3.9	3.9	3.9	33.847	0	4.4121	44870000	2	15.1789	14.8295	15.0939	14.9893	14.7167	14.844	14.8038	14.7001	14.772	14.9477	13.6392	12.6796	13.4595	13.0312	12.8826	12.8875	13.7727	13.173	13.205	13.2005
Q6M016		0.535137	0.228354		0.14626	0.125245		Probable ATP dependent RNA helicase OS=Methanococcus maripaludis (strain S2 / LL) OX=267377 GN=MMP0457 PE=3 SV=1								17	17	17	40.1	40.1	40.1	60.653	0	59.611	1353200000	24	19.0587	19.4346	19.0599	19.2421	19.1693	18.677	19.2823	18.7396	18.6258	19.0312	18.6276	18.4823	19.8303	18.9675	18.6975	19.3727	18.8425	18.6478	18.6011	18.966
Q6M184		1.66317	0.228308		0.748976	0.0966463		LysR family member OS=Methanococcus maripaludis (strain S2 / LL) OX=267377 GN=MMP0033 PE=4 SV=1								7	7	7	14.7	14.7	14.7	45.944	0	18.433	203930000	8	17.4548	17.3859	17.7071	17.389	17.3043	17.3128	17.2932	17.1634	17.2632	17.3684	17.288	17.4456	17.4786	17.2438	17.3749	17.3261	17.1639	17.3481	17.3878	17.3435
Q6LZJ4		0.73481	0.225699		0.191946	-0.117425		Rubrerythrin OS=Methanococcus maripaludis (strain S2 / LL) OX=267377 GN=MMP0633 PE=4 SV=1								12	12	12	59.6	59.6	59.6	22.114	0	74.154	10183000000	35	21.3337	21.274	20.855	20.8478	20.6827	20.9408	20.8036	21.0667	21.2296	21.0026	20.8857	20.7098	19.8577	20.3862	20.825	20.45	20.4083	20.8137	20.7278	20.5494
Q6LWW5		0.796383	0.224915		0.32141	0.0621373		Carbamoyl-phosphate synthase small chain OS=Methanococcus maripaludis (strain S2 / LL) OX=267377 GN=carA PE=3 SV=1								15	15	15	43.2	43.2	43.2	40.518	0	67.816	1252700000	24	18.9332	18.723	19.2635	18.5759	18.8937	18.9757	18.6584	18.7961	18.5902	18.7954	19.1081	19.3731	19.3781	19.338	19.0993	19.2934	19.2911	19.1977	19.1262	19.2291
P60888		0.483624	0.224914		0.368145	0.0656694		Imidazoleglycerol-phosphate dehydratase OS=Methanococcus maripaludis (strain S2 / LL) OX=267377 GN=hisB PE=3 SV=1								8	8	8	54.7	54.7	54.7	21.218	0	26.937	1242800000	9	17.9089	18.0565	17.7301	17.7892	17.7173	18.1108	17.0648	17.7542	17.605	17.798	17.9395	18.1129	17.8578	17.8689	17.933	17.7822	17.8472	18.0809	17.9142	17.9427
Q6LY28		0.943881	0.21835		0.11435	-0.0595471		HMA domain-containing protein OS=Methanococcus maripaludis (strain S2 / LL) OX=267377 GN=MMP1165 PE=4 SV=1								4	4	4	8.4	8.4	8.4	79.168	0	9.6123	117860000	6	16.8713	16.7738	16.996	16.5379	16.4444	16.8729	16.4949	16.8188	16.8033	16.8061	17.3056	16.9494	16.6473	16.713	17.276	16.8275	17.0092	17.3585	16.9777	16.9805
Q6M0U2		1.81318	0.218348		0.887499	-0.404872		CDC48 cell division cycle protein family member OS=Methanococcus maripaludis (strain S2 / LL) OX=267377 GN=MMP0176 PE=4 SV=1								65	65	65	75.9	75.9	75.9	87.236	0	279.71	20907000000	137	22.2226	22.1136	22.1675	21.7681	21.9545	21.9016	22.0558	22.0649	21.9523	21.9837	22.742	22.7218	22.7	22.5831	23.1004	23.5778	22.7574	23.2609	23.4774	23.0309
Q6LYK6		0.321271	0.217915		0.595585	0.36492		Acetyl-CoA decarbonylase/synthase complex subunit alpha OS=Methanococcus maripaludis (strain S2 / LL) OX=267377 GN=cdhA PE=3 SV=1								32	32	32	38.3	38.3	38.3	85.624	0	105.25	9054200000	63	21.1299	21.2857	22.0333	21.1047	21.5312	21.8047	20.7041	21.2815	21.164	21.3519	21.5473	22.7725	22.6109	22.2653	21.7416	21.9936	22.1885	21.8667	21.6164	22.0577
Q6M058		0.369139	0.217697		0.227228	0.371047		Uncharacterized protein OS=Methanococcus maripaludis (strain S2 / LL) OX=267377 GN=MMP0413 PE=4 SV=1								33	33	29	52.7	52.7	46.5	78.81	0	234.46	5149600000	73	21.3612	21.2121	20.5348	21.1951	20.7495	20.6486	21.1328	20.8838	20.3002	20.8788	22.1014	19.7348	20.1281	21.1917	19.5883	19.8133	21.1548	20.4474	19.5068	20.6086
Q6LZS1		1.41292	0.213098		0.94189	0.16535		Ornithine carbamoyltransferase OS=Methanococcus maripaludis (strain S2 / LL) OX=267377 GN=argF PE=3 SV=1								13	13	13	38.2	38.2	38.2	34.084	0	42.452	1629400000	24	19.7324	19.8473	20.0231	19.8501	19.6328	19.5827	19.6918	19.6028	19.5668	19.7243	19.7615	19.9854	20.1829	19.7998	19.7966	19.9619	19.7701	19.787	19.7521	19.8705
Q6LWZ6		0.346868	0.210674		0.186161	0.0915505		Methyl-coenzyme M reductase subunit gamma OS=Methanococcus maripaludis (strain S2 / LL) OX=267377 GN=mcrG PE=4 SV=1								30	30	30	86.5	86.5	86.5	29.605	0	190.63	145090000000	170	24.9638	25.2033	24.4832	24.5639	24.6028	24.01	24.9108	25.0323	24.9169	24.7984	25.0038	24.5396	24.166	24.4871	24.5975	24.1078	24.5164	24.6011	24.5594	24.5284
Q6LWZ5		0.410043	0.209532		0.389406	0.157832		Methyl-coenzyme M reductase subunit alpha OS=Methanococcus maripaludis (strain S2 / LL) OX=267377 GN=mcrA PE=4 SV=1								30	30	30	47.4	47.4	47.4	61.069	0	209.41	177690000000	181	25.2464	25.4728	24.7452	24.9735	24.8999	24.3728	25.0997	25.1268	25.1988	25.1088	25.2454	24.7514	24.4883	24.6961	24.6801	24.332	24.7784	24.8333	24.7033	24.8102
Q6M0N6		0.558099	0.208876		0.482629	-0.181866		Uncharacterized protein OS=Methanococcus maripaludis (strain S2 / LL) OX=267377 GN=MMP0234 PE=4 SV=1								19	19	19	52.1	52.1	52.1	42.862	0	89.742	4404400000	39	19.9795	20.1751	20.545	19.8226	20.0631	20.4283	19.7649	20.057	20.0102	20.09	20.1546	20.0207	19.7054	20.0205	20.1005	19.7934	20.1287	20.2665	20.5431	20.0851
Q6LX29		0.474458	0.208442		0.198065	0.0857838		Protein-export membrane protein SecF OS=Methanococcus maripaludis (strain S2 / LL) OX=267377 GN=secF PE=3 SV=1								2	2	2	7.8	7.8	7.8	30.097	0	6.8572	54729000	3	16.0153	15.8816	16.544	15.7266	16.1497	16.2296	16.0266	15.5628	15.9358	15.9619	15.9825	15.8625	15.7364	15.4219	15.996	15.5549	15.6515	16.1457	15.8779	15.8766
Q6LWV9		0.814929	0.207955		0.550629	0.0899096		PUA domain-containing protein OS=Methanococcus maripaludis (strain S2 / LL) OX=267377 GN=MMP1595 PE=4 SV=1								9	9	9	20.1	20.1	20.1	61.546	0	31.641	12018000000	13	18.1192	18.2106	18.3691	17.8493	18.2155	18.335	17.8861	17.9772	17.887	18.0966	18.2888	18.3797	18.6119	18.3496	18.298	18.4454	18.3972	18.2529	18.2784	18.3738
Q6LYR8		1.10348	0.206664		0.228134	-0.0579144		S-inosyl-L-homocysteine hydrolase OS=Methanococcus maripaludis (strain S2 / LL) OX=267377 GN=ahcY PE=3 SV=1								18	18	17	51.8	51.8	50.6	45.833	0	96.543	3117600000	33	19.7368	19.8603	20.1264	19.6037	19.8732	19.8011	19.6112	19.6852	19.6326	19.7772	20.0858	19.7881	19.9843	19.8519	20.1576	19.8563	19.9513	20.0837	20.1629	19.994
Q6LZN9		0.865017	0.206273		0.420782	0.149553		Usp domain-containing protein OS=Methanococcus maripaludis (strain S2 / LL) OX=267377 GN=MMP0585 PE=4 SV=1								10	10	10	57.2	57.2	57.2	15.771	0	42.061	5258400000	17	20.3827	20.2878	20.1853	20.1771	20.0367	20.199	19.7927	19.9379	20.3307	20.1247	20.439	20.3843	19.8628	20.0665	20.0346	19.7627	20.16	20.2567	20.1944	20.1236
Q6M015		0.657397	0.2023		0.0567148	0.0208464		Uncharacterized protein OS=Methanococcus maripaludis (strain S2 / LL) OX=267377 GN=MMP0458 PE=4 SV=1								10	10	10	26.8	26.8	26.8	62.337	0	36.739	442080000	16	17.7232	17.3912	17.6827	17.1049	17.3286	17.6794	17.1955	17.5097	17.5622	17.5181	17.9111	17.7683	17.463	17.6608	17.9163	17.4321	17.6509	17.8064	17.6931	17.6865
Q6M0F1		0.565695	0.200884		1.13558	0.187211		Shikimate kinase OS=Methanococcus maripaludis (strain S2 / LL) OX=267377 GN=aroK PE=3 SV=1								4	4	4	16.3	16.3	16.3	30.411	0	8.8376	61413000	4	15.5413	15.3896	15.3911	15.1778	15.4181	15.7126	15.0232	14.997	15.1099	15.4261	16.5602	16.7257	16.82	16.5588	16.4114	16.601	16.6119	16.592	16.3134	16.5855
Q6LYN4		0.680457	0.200503		1.4238	0.450933		DNA topoisomerase 1 OS=Methanococcus maripaludis (strain S2 / LL) OX=267377 GN=topA PE=3 SV=1								6	5	5	7.2	6.3	6.3	93.927	0	14.613	286650000	8	18.7376	18.8122	18.758	18.3855	18.6108	18.6924	18.6704	18.8631	18.1906	18.534	17.9058	17.873	17.3375	17.2277	17.6728	17.0586	17.1554	17.2452	17.1671	17.2216
Q6LWZ9		0.38149	0.199483		0.35262	0.170286		Methyl-coenzyme M reductase subunit beta OS=Methanococcus maripaludis (strain S2 / LL) OX=267377 GN=mcrB PE=4 SV=1								24	24	24	59.8	59.8	59.8	46.646	0	233.48	123810000000	329	24.0765	24.2399	23.6712	23.8108	23.701	23.1693	23.9939	24.0651	24.0382	23.9159	24.567	23.9735	23.7343	23.9882	23.9222	23.4943	24.1075	24.0883	23.9274	24.0036
Q6LZS6		2.299	0.197229		0.197416	-0.102852		DHHA1 domain-containing protein OS=Methanococcus maripaludis (strain S2 / LL) OX=267377 GN=MMP0547 PE=4 SV=1								3	3	3	11.1	11.1	11.1	48.54	0	13.382	109100000	4	15.783	15.703	15.7297	15.6124	15.5212	15.6323	15.4569	15.4503	15.575	15.5546	15.0008	14.4133	14.248	14.8523	14.5684	14.3732	14.5659	15.0326	14.549	14.6073
Q6LXX7		1.07508	0.195175		0.543773	0.10706		Saccharop_dh_N domain-containing protein OS=Methanococcus maripaludis (strain S2 / LL) OX=267377 GN=MMP1218 PE=1 SV=1								13	13	12	34.7	34.7	32.5	45.547	0	39.107	1644400000	18	20.2283	20.3183	20.5012	20.2454	20.1625	19.8861	20.163	20.23	20.2376	20.2199	19.2118	19.5979	19.5607	19.4472	19.2403	19.3848	19.4074	19.2995	19.3191	19.3657
Q6LZA2		1.6132	0.192225		0.13839	0.0478144		UvrABC system protein B OS=Methanococcus maripaludis (strain S2 / LL) OX=267377 GN=uvrB PE=3 SV=1								4	4	4	8.4	8.4	8.4	74.764	0	25.125	168080000	6	16.3877	16.2402	16.1342	16.0542	15.9559	16.0136	16.0516	16.113	16.1824	16.0305	16.6908	16.4169	16.9797	16.4873	16.634	16.7632	16.6209	16.8334	16.5492	16.6697
Q6LXI1		1.40038	0.190655		0.202513	0.10797		Elongation factor 1-alpha OS=Methanococcus maripaludis (strain S2 / LL) OX=267377 GN=tuf PE=3 SV=1								27	27	27	73.8	73.8	73.8	46.396	0	218.81	158060000000	244	24.4117	24.377	24.4037	24.2454	24.3478	24.1317	24.3478	24.1193	24.049	24.3257	23.7529	24.2798	24.4668	24.2184	23.8205	24.4871	24.1285	23.8564	23.8403	24.1262
Q6M0X4		1.13809	0.185448		0.0365055	0.0125995		FAA_hydrolase domain-containing protein OS=Methanococcus maripaludis (strain S2 / LL) OX=267377 GN=hpcE PE=4 SV=1								2	2	2	10.9	10.9	10.9	22.503	0	4.6368	11453000	2	15.7084	15.5706	15.8462	15.4227	15.6761	15.6436	15.5504	15.4457	15.399	15.5984	14.5705	14.61	14.6576	14.6169	14.5708	14.8727	14.2575	14.6717	14.611	14.4039
Q6LX78		1.86924	0.182939		0.424199	0.109501		Isoleucine--tRNA ligase OS=Methanococcus maripaludis (strain S2 / LL) OX=267377 GN=ileS PE=3 SV=1								31	31	31	35.8	35.8	35.8	119.91	0	151.63	3383300000	60	20.9751	20.8808	20.9321	20.6929	20.8699	20.8465	20.7088	20.7003	20.6601	20.7916	20.7541	20.6874	21.1951	20.7347	20.8197	20.8928	20.7554	20.774	20.6394	20.8191
Q6LXB2		1.84899	0.182677		0.306645	0.171206		S-adenosyl-L-methionine-dependent tRNA 4-demethylwyosine synthase OS=Methanococcus maripaludis (strain S2 / LL) OX=267377 GN=taw1 PE=3 SV=1								6	6	6	19.8	19.8	19.8	36.193	0	18.369	264290000	6	17.2958	17.3724	17.415	17.1802	17.2376	17.2628	17.0939	17.2412	17.0545	17.2252	15.3875	15.674	16.1796	15.8542	15.398	15.8936	15.7982	15.2445	15.2663	15.6832
Q6M0M0		0.413427	0.182394		0.595474	-0.119552		Uncharacterized protein OS=Methanococcus maripaludis (strain S2 / LL) OX=267377 GN=MMP0250 PE=4 SV=1								14	14	14	58.5	58.5	58.5	26.499	0	55.375	1325500000	21	19.308	19.1061	19.2271	18.7447	19.1711	19.6198	18.9062	18.8005	18.9457	19.1303	19.2192	19.2141	19.3983	19.2183	19.3727	19.5917	19.2725	19.3823	19.5429	19.3751
Q6M123		0.958321	0.179591		0.213072	-0.145195		Uncharacterized protein OS=Methanococcus maripaludis (strain S2 / LL) OX=267377 GN=MMP0095 PE=4 SV=1								6	6	6	20.6	20.6	20.6	45.078	0	28.82	236830000	9	17.8408	17.881	17.9398	17.5534	17.7249	17.9416	17.6428	17.8439	17.5391	17.7707	17.1251	17.4439	17.6852	17.1891	17.4929	18.3769	17.2811	17.4967	17.5429	17.5398
Q6LYR3		0.465058	0.174526		0.00565628	-0.00809987		CheW-like domain-containing protein OS=Methanococcus maripaludis (strain S2 / LL) OX=267377 GN=cheW PE=4 SV=1								4	4	4	40.1	40.1	40.1	16.38	0	37.509	746440000	7	18.5265	18.4773	18.4721	18.3945	18.3459	18.233	18.6845	18.4284	17.8184	18.358	19.1909	17.1177	17.8965	18.5461	17.9553	17.6556	18.7528	17.8328	17.7163	18.0938
Q6LZK4		0.308393	0.1733		0.880835	0.163789		Uncharacterized protein OS=Methanococcus maripaludis (strain S2 / LL) OX=267377 GN=MMP0623 PE=4 SV=1								7	7	7	32.4	32.4	32.4	23.708	0	29.909	623910000	13	18.3661	17.7745	17.941	17.6466	17.774	18.4555	17.4148	17.9317	17.9008	17.9588	18.5415	18.7246	18.5702	18.3982	18.498	18.1727	18.5563	18.4956	18.5693	18.4134
Q6M050		0.844218	0.170706		0.577625	0.102224		Uncharacterized protein OS=Methanococcus maripaludis (strain S2 / LL) OX=267377 GN=MMP0421 PE=4 SV=1								4	4	4	23	23	23	34.97	0	25.006	156070000	5	16.5133	16.5035	16.6007	16.2856	16.439	16.4917	16.1628	16.6036	16.228	16.5275	17.479	17.4565	17.7257	17.4732	17.5125	17.5854	17.4794	17.2974	17.3611	17.5524
Q6LY47		1.56813	0.169103		1.24568	0.146997		Amidophosphoribosyltransferase OS=Methanococcus maripaludis (strain S2 / LL) OX=267377 GN=purF PE=3 SV=1								4	4	4	12	12	12	50.828	0	7.5735	138330000	5	16.3743	16.5288	16.5592	16.3772	16.3036	16.3183	16.2582	16.4369	16.2158	16.4127	17.5649	17.5862	17.5464	17.5636	17.473	17.4151	17.453	17.3595	17.2488	17.432
Q6LYW9		0.253955	0.168752		0.886244	0.356249		OpuAC domain-containing protein OS=Methanococcus maripaludis (strain S2 / LL) OX=267377 GN=proX PE=4 SV=1								8	8	8	47.5	47.5	47.5	32.988	0	66.793	1068000000	20	17.6385	18.4512	18.1806	17.9157	18.4068	18.1219	17.4416	18.1221	17.5201	18.0095	19.5643	19.0249	19.7406	19.0952	18.9415	19.4597	19.2634	19.0386	18.7237	19.2298
P60862		1.64035	0.165495		1.40072	0.240191		Histidinol dehydrogenase OS=Methanococcus maripaludis (strain S2 / LL) OX=267377 GN=hisD PE=3 SV=1								11	11	11	27.6	27.6	27.6	46.183	0	52.217	290060000	13	18.02	18.0631	17.9599	17.8388	17.8021	17.9729	17.7124	17.8565	17.9103	17.9383	19.5187	19.5777	19.4777	19.2068	19.4912	19.4307	19.0646	19.2885	19.2253	19.2936
Q6LX20		0.606466	0.165372		0.190356	0.0577008		Conserved hypothetical Archael protein OS=Methanococcus maripaludis (strain S2 / LL) OX=267377 GN=MMP1533 PE=4 SV=1								11	11	11	76	76	76	17.618	0	40.212	3864800000	23	20.0254	20.0124	20.3941	19.815	19.9888	20.1942	19.7536	19.9916	20.1283	20.0518	19.7617	19.9388	19.4996	19.6336	19.7263	19.4054	19.7572	19.8075	19.724	19.6889
Q6LWT0		0.455683	0.164118		0.48963	0.14429		MnhB domain-containing protein OS=Methanococcus maripaludis (strain S2 / LL) OX=267377 GN=MMP1626 PE=4 SV=1								2	2	2	6.3	6.3	6.3	27.605	0	4.6428	68661000	3	15.584	15.518	16.1111	15.3004	15.6966	15.7547	15.5915	15.6924	15.4061	15.707	15.2816	15.7437	15.5987	15.1445	15.4041	15.2528	15.5961	15.4438	15.5409	15.3895
Q6LZH8		0.758522	0.160181		0.371406	0.0629425		Acetolactate synthase OS=Methanococcus maripaludis (strain S2 / LL) OX=267377 GN=ilvB PE=3 SV=1								17	17	17	42.4	42.4	42.4	63.803	0	85.437	3689000000	34	20.1017	20.1536	20.4819	19.9303	20.1971	20.1402	20.0602	20.2192	19.9665	20.1002	20.6352	20.9236	20.955	20.6808	20.7576	20.8128	20.8085	20.832	20.7583	20.8031
Q6LYG1		0.703978	0.159513		0.0811616	0.00943883		Conserved hypothetical archaeal protein OS=Methanococcus maripaludis (strain S2 / LL) OX=267377 GN=MMP1030 PE=4 SV=1								3	3	3	16.2	16.2	16.2	22.775	0	11.147	262820000	6	17.8527	17.7748	18.1466	17.6157	17.8701	17.9152	17.8915	17.6615	17.6371	17.7963	18.1271	18.1233	18.0755	18.0273	18.112	18.0347	18.0803	18.2112	18.1297	18.1675
Q6LYF1		0.496049	0.158613		0.26212	-0.0653117		A1A0 ATPase, subunit K OS=Methanococcus maripaludis (strain S2 / LL) OX=267377 GN=atpK PE=4 SV=1								1	1	1	3.2	3.2	3.2	21.501	0.0079761	2.5272	858300000	2	18.5314	18.2007	18.7146	18.0973	18.4663	18.5709	18.3961	18.157	18.2541	18.2976	17.2647	17.7418	17.5385	17.4386	17.5707	17.548	17.6724	17.6424	17.6095	17.5112
Q6LX83		0.611202	0.157641		0.197885	-0.0638844		Uncharacterized protein OS=Methanococcus maripaludis (strain S2 / LL) OX=267377 GN=ehbA PE=4 SV=1								2	2	2	13	13	13	11.181	0	6.2273	144640000	4	16.8195	16.8964	17.1538	16.6922	16.8969	16.8624	16.4883	16.9144	16.9392	16.897	16.3887	16.7824	16.9149	16.6166	16.599	16.8042	16.7682	16.9145	16.8527	16.7478
Q6LX91		1.93135	0.157094		0.894083	-0.427083		Oxidored_q6 domain-containing protein OS=Methanococcus maripaludis (strain S2 / LL) OX=267377 GN=ehaN PE=4 SV=1								1	1	1	9.6	9.6	9.6	16.911	0	6.6272	126100000	2	16.2292	16.2209	16.3108	16.0486	16.0801	15.9954	16.1986	16.1336	16.1228	16.055	16.0577	16.2069	15.9935	15.9287	16.5695	17.012	16.17	16.5404	16.8582	16.4908
Q6LXF7		0.532864	0.156966		2.42618	0.198984		3-dehydroquinate dehydratase OS=Methanococcus maripaludis (strain S2 / LL) OX=267377 GN=aroD PE=1 SV=1								2	2	2	8.3	8.3	8.3	24.532	0	4.5021	68998000	3	14.7844	14.6493	14.7913	14.3119	14.6201	14.9289	14.6105	14.6775	14.3592	14.5007	16.5131	16.4358	16.5302	16.3211	16.2324	16.3117	16.4137	16.2658	16.2197	16.4297
Q6LWI8		0.534759	0.156852		0.632821	0.190739		AAA_31 domain-containing protein OS=Methanococcus maripaludis (strain S2 / LL) OX=267377 GN=MMP1721 PE=4 SV=1								8	8	8	38.5	38.5	38.5	29.318	0	37.192	1057700000	15	19.3398	19.4355	19.6529	19.2871	19.4367	19.5866	18.9751	19.3818	19.248	19.406	19.0117	19.0653	18.7209	18.6559	18.8834	18.3552	18.7478	18.9143	18.8947	18.7562
Q6LZK3		0.175288	0.155356		0.334034	-0.267642		Putative_PNPOx domain-containing protein OS=Methanococcus maripaludis (strain S2 / LL) OX=267377 GN=MMP0624 PE=4 SV=1								6	6	6	50.4	50.4	50.4	14.371	0	23.559	2062400000	13	19.4969	19.7625	20.1294	19.1967	19.3087	20.7059	19.4796	19.5136	19.6411	19.8098	17.8098	17.478	17.1758	17.1287	17.5594	17.5409	17.5178	18.6373	18.1489	17.6618
Q6M0K3		0.451461	0.15495		0.123544	-0.0294037		Conserved hypothetical archaeal protein OS=Methanococcus maripaludis (strain S2 / LL) OX=267377 GN=MMP0267 PE=4 SV=1								4	4	4	21.4	21.4	21.4	25.888	0	16.512	307380000	7	17.6594	17.2542	17.7231	17.1646	17.3206	17.7447	17.2649	17.3477	17.5011	17.4482	16.2827	16.3839	16.1668	16.259	16.2755	16.1551	16.2326	16.3906	16.5304	16.4187
Q6LZM1		0.459513	0.152049		0.432419	0.177195		Translation initiation factor 1A OS=Methanococcus maripaludis (strain S2 / LL) OX=267377 GN=eif1a PE=3 SV=1								5	5	5	58.7	58.7	58.7	12.355	0	23.214	993840000	8	19.052	19.3182	18.9793	19.2328	19.0282	18.6041	19.0787	19.0487	18.7944	19.0481	17.968	18.2262	18.4694	18.3157	17.9306	18.2817	18.2016	17.643	17.8915	18.0656
Q6LZG3		0.550256	0.151869		0.0431133	0.0209373		Na+/Pi-cotransporter related protein OS=Methanococcus maripaludis (strain S2 / LL) OX=267377 GN=MMP0666 PE=4 SV=1								3	3	3	5.9	5.9	5.9	58.984	0	9.2968	217910000	5	15.6385	15.8685	15.6716	15.4884	15.3243	15.9089	15.5389	15.6992	15.4864	15.6852	17.6772	18.1919	17.9956	17.5835	17.9098	18.2514	17.7911	18.0867	17.9815	17.9133
P61413		0.416707	0.151453		0.132097	0.105467		Thiamine-phosphate synthase OS=Methanococcus maripaludis (strain S2 / LL) OX=267377 GN=thiE PE=3 SV=1								2	2	2	15	15	15	22.357	0.0097656	2.3115	20151000	2	12.1858	11.8065	12.1117	11.6324	12.1894	11.9209	11.9887	11.559	12.0087	12.0847	13.3584	14.3928	14.0469	14.0698	13.9739	14.3303	13.4639	13.3152	13.8101	14.1274
Q6LY40		0.55777	0.150711		0.0445226	-0.0209417		Energy conserving hydrogenase B large subunit OS=Methanococcus maripaludis (strain S2 / LL) OX=267377 GN=ehbN PE=4 SV=1								6	6	6	20	20	20	43.01	0	25.909	588000000	10	17.2014	17.1589	17.5858	17.1299	17.3414	17.2655	16.9997	17.2761	16.9754	17.2087	17.6278	18.4622	17.9758	17.9635	17.9861	18.0225	18.0483	18.183	18.0538	18.0079
Q6LWN4		0.412748	0.150174		0.730236	0.220108		T2SP_E domain-containing protein OS=Methanococcus maripaludis (strain S2 / LL) OX=267377 GN=flaI PE=4 SV=1								6	6	6	12.8	12.8	12.8	62.412	0	16.835	218380000	7	17.6209	17.4029	17.1111	17.3372	17.2047	17.2129	17.4802	17.3029	16.8309	17.2972	16.6405	16.1896	16.1397	16.2834	16.0257	16.0654	16.3161	16.1049	15.8236	16.2094
Q6M154		0.738536	0.149675		0.0821387	-0.0297127		Acetylglutamate kinase OS=Methanococcus maripaludis (strain S2 / LL) OX=267377 GN=argB PE=3 SV=1								7	7	7	40.1	40.1	40.1	32.249	0	40.384	693690000	10	18.3526	18.4431	18.6482	18.5134	18.4221	18.427	18.1818	18.245	18.2005	18.3252	17.8269	18.0733	18.2753	18.0587	17.9846	18.242	18.0172	17.8902	18.3366	18.1058
Q6LX43		1.09026	0.147786		0.231516	0.0876331		Glutamyl-tRNA(Gln) amidotransferase subunit A OS=Methanococcus maripaludis (strain S2 / LL) OX=267377 GN=gatA PE=3 SV=1								10	10	10	18.8	18.8	18.8	47.139	0	23.74	1036100000	16	19.1606	19.0158	19.2657	19.088	19.0956	19.0195	19.016	18.8976	18.8804	19.0035	18.285	18.673	19.028	18.6018	18.5598	18.7654	18.5182	18.4575	18.5434	18.5394
P62026		0.419524	0.146308		0.472388	-0.0888456		50S ribosomal protein L40e OS=Methanococcus maripaludis (strain S2 / LL) OX=267377 GN=rpl40e PE=3 SV=1								2	2	2	17	17	17	5.5276	0.001056	3.4469	716410000	3	19.3217	18.847	18.8316	18.9269	18.9328	18.5261	19.1077	18.832	18.7974	18.6476	16.7034	16.9165	16.9307	16.9389	17.1187	17.0403	16.8325	16.8163	16.8874	16.7834
Q6LXH9		1.10668	0.145614		0.0208526	0.0081501		Phosphoglucomutase/phosphomannomutase OS=Methanococcus maripaludis (strain S2 / LL) OX=267377 GN=manB PE=3 SV=1								12	12	12	34.6	34.6	34.6	49.998	0	58.016	728990000	20	18.2003	18.4188	18.2567	18.1133	18.0617	18.0719	18.1007	18.2611	18.2692	18.2661	18.7346	18.3766	18.1226	18.4473	18.4489	18.2369	18.4478	18.5357	18.3022	18.3336
Q6LYK7		0.142763	0.145383		0.281313	0.200366		Acetyl-CoA decarbonylase/synthase complex subunit epsilon OS=Methanococcus maripaludis (strain S2 / LL) OX=267377 GN=cdh PE=3 SV=1								6	6	6	45.3	45.3	45.3	19.154	0	41.673	978300000	8	18.525	18.9767	19.726	18.7973	19.3353	19.6511	18.1217	18.7566	18.9213	18.9725	16.4222	17.3258	17.4793	17.2062	16.42	16.9087	17.3014	16.8446	16.5715	17.0065
Q6LXC8		0.278033	0.144897		1.94043	0.300804		Oligosaccharyl transferase, STT3 subunit OS=Methanococcus maripaludis (strain S2 / LL) OX=267377 GN=MMP1424 PE=4 SV=1								10	10	10	19.8	19.8	19.8	94.926	0	63.587	981820000	19	17.9678	18.2744	18.6308	17.9961	18.2873	18.6704	17.8222	18.0088	18.0918	18.2526	18.7382	18.91	18.6791	18.3912	18.5106	18.3783	18.3299	18.6113	18.6287	18.5569
Q6LZT1		0.942726	0.144836		0.233857	0.101961		Uncharacterized protein OS=Methanococcus maripaludis (strain S2 / LL) OX=267377 GN=MMP0542 PE=4 SV=1								16	16	16	56.9	56.9	56.9	24.637	0	62.585	5586000000	35	20.0307	20.007	20.05	19.6933	19.74	20.0206	19.9468	19.9464	19.9593	19.8645	20.4871	20.3186	19.8031	20.1008	20.3017	19.7397	20.1023	20.2231	20.1381	20.0737
Q6LX72		1.00171	0.144378		2.38515	-0.342205		3-isopropylmalate dehydratase large subunit OS=Methanococcus maripaludis (strain S2 / LL) OX=267377 GN=leuC PE=3 SV=1								11	11	11	31.6	31.6	31.6	45.587	0	38.175	528820000	17	18.911	18.7363	18.6606	18.6755	18.7608	18.6646	18.4903	18.6188	18.5394	18.7262	17.4098	17.3392	17.5741	17.6674	17.8798	17.8519	17.6117	17.857	17.8315	17.7306
Q6LWX7		0.547203	0.143236		0.054668	0.0258679		N-acetyltransferase domain-containing protein OS=Methanococcus maripaludis (strain S2 / LL) OX=267377 GN=hat PE=4 SV=1								6	6	6	15.7	15.7	15.7	61.434	0	18.795	166970000	10	16.6055	16.4962	16.5467	16.4364	16.414	16.5433	16.0043	16.5164	16.5231	16.5866	15.5615	16.052	16.2694	16.1069	15.7865	16.0756	16.0635	15.7938	15.7843	15.7867
Q6LXK0		0.59206	0.142392		0.047338	0.0251223		Elp3 domain-containing protein OS=Methanococcus maripaludis (strain S2 / LL) OX=267377 GN=MMP1350 PE=4 SV=1								3	3	3	8	8	8	49.236	0	17.072	47129000	4	15.5942	15.5691	15.5131	15.503	15.5385	15.6721	15.1443	15.2921	15.3482	15.4836	14.4546	13.9414	14.0254	14.1612	13.9779	13.8023	14.5729	14.1461	14.0316	14.2323
Q6M069		0.546397	0.141216		2.00691	-0.319454		HTH arsR-type domain-containing protein OS=Methanococcus maripaludis (strain S2 / LL) OX=267377 GN=MMP0402 PE=4 SV=1								6	6	6	16.6	16.6	16.6	51.531	0	11.955	165860000	6	16.5749	16.5816	16.8654	16.3805	16.6228	16.846	16.4513	16.4807	16.4154	16.603	16.6866	16.6717	16.6585	16.7332	17.0769	16.9831	16.9204	17.0727	17.164	16.9399
Q6LWT5		0.37756	0.141114		0.619467	0.265409		Energy conserving hydrogenase B integral membrane subunit OS=Methanococcus maripaludis (strain S2 / LL) OX=267377 GN=ehbO PE=4 SV=1								1	1	1	4.2	4.2	4.2	36.745	0	5.1373	63872000	2	13.6138	13.462	13.9252	13.2643	13.7524	13.7665	13.3949	13.6752	13.3023	13.6288	13.9427	14.4307	13.9791	14.0471	13.7594	13.4625	14.3273	13.8251	13.6912	13.685
Q6M052		0.910544	0.139305		0.236126	-0.128835		Transporter OS=Methanococcus maripaludis (strain S2 / LL) OX=267377 GN=MMP0419 PE=3 SV=1								3	3	3	4.4	4.4	4.4	55.106	0	6.9734	227120000	4	15.4856	15.6781	15.7647	15.5843	15.4067	15.356	15.5697	15.5711	15.533	15.5881	16.9399	17.0483	16.6271	16.7036	17.5105	16.553	16.9806	17.0399	17.216	16.9801
Q6M0D7		1.10005	0.136003		0.946295	-0.281899		SpoU_methylase domain-containing protein OS=Methanococcus maripaludis (strain S2 / LL) OX=267377 GN=MMP0334 PE=4 SV=1								1	1	1	6.4	6.4	6.4	26.249	0	6.3086	39218000	2	13.1675	13.1403	13.0847	12.9459	12.9629	13.0655	12.8423	12.995	13.1571	12.9746	13.3167	13.5571	13.7149	13.7472	13.9177	14.0946	13.416	13.8949	13.7984	13.4768
Q6LX80		0.416912	0.130799		0.687037	0.238572		RNA-free ribonuclease P OS=Methanococcus maripaludis (strain S2 / LL) OX=267377 GN=MMP1472 PE=3 SV=1								4	4	4	25.1	25.1	25.1	25.673	0	27.295	322430000	8	17.2571	17.1267	17.1817	16.9687	17.013	17.4687	16.8395	17.169	16.8873	17.1215	17.9298	18.283	17.8899	17.6224	18.0478	17.5497	17.662	18.1679	17.7242	17.9213
Q6M0W5		0.935186	0.128188		0.714241	-0.16923		Pyruvate carboxyltransferase domain-containing protein OS=Methanococcus maripaludis (strain S2 / LL) OX=267377 GN=aksA PE=3 SV=1								11	11	11	29.3	29.3	29.3	43.011	0	50.272	1763900000	21	18.5687	18.6529	18.7093	18.4582	18.5872	18.6772	18.3572	18.5359	18.4769	18.5185	19.3049	19.2391	19.2165	19.1207	19.489	19.3802	19.3118	19.5749	19.66	19.3519
Q6M1A6		0.455262	0.128003		1.31694	0.198438		Conserved hypothetical Archael protein OS=Methanococcus maripaludis (strain S2 / LL) OX=267377 GN=MMP0010 PE=4 SV=1								3	3	3	29.8	29.8	29.8	15.545	0	10.882	131740000	4	17.0793	17.0366	16.7303	16.75	16.9028	16.8926	16.7825	17.0604	16.5362	16.8899	16.3613	16.1535	16.0483	16.0353	15.9909	15.8431	16.0889	16.0675	15.9099	15.9333
Q6LX82		0.556958	0.125669		0.319893	-0.0414785		Prefoldin subunit alpha OS=Methanococcus maripaludis (strain S2 / LL) OX=267377 GN=pfdA PE=3 SV=1								9	9	9	56.2	56.2	56.2	16.389	0	44.755	2203100000	22	19.0389	19.0979	19.0051	18.7907	18.8938	19.24	18.7891	18.8138	19.0025	18.9898	19.4615	19.4414	19.589	19.4143	19.5039	19.6497	19.5488	19.5717	19.5442	19.4995
Q6LWU3		0.629791	0.123796		0.842619	0.219522		Uncharacterized protein OS=Methanococcus maripaludis (strain S2 / LL) OX=267377 GN=MMP1611 PE=1 SV=1								8	8	8	38.8	38.8	38.8	27.504	0	18.691	406110000	10	17.5514	17.6591	17.5543	17.6776	17.5524	17.2453	17.4059	17.5377	17.3679	17.4005	18.742	18.6877	18.8506	18.8269	18.271	18.2949	18.6373	18.6389	18.5745	18.61
Q6LXF9		0.570884	0.123371		1.08624	0.125374		RNA-splicing ligase RtcB OS=Methanococcus maripaludis (strain S2 / LL) OX=267377 GN=rtcB PE=3 SV=1								11	11	11	28.3	28.3	28.3	52.801	0	52.672	1599500000	18	19.3846	19.6273	19.4945	19.4471	19.3719	19.4643	19.0788	19.5018	19.4088	19.3964	18.4274	18.4938	18.3975	18.3015	18.3626	18.2214	18.3133	18.4769	18.2094	18.335
Q6LYV3		0.425547	0.121373		0.461182	0.168155		Uncharacterized protein OS=Methanococcus maripaludis (strain S2 / LL) OX=267377 GN=MMP0884 PE=4 SV=1								3	3	3	27.9	27.9	27.9	19.011	0	20.281	876540000	7	18.8422	18.4764	18.9794	18.7703	18.6368	18.7828	18.5548	18.4234	18.6997	18.8187	18.02	17.7166	17.9589	18.0033	17.4925	17.5611	18.1077	17.562	17.6556	17.8325
P60921		0.230624	0.121244		0.562743	-0.228695		Histidine--tRNA ligase OS=Methanococcus maripaludis (strain S2 / LL) OX=267377 GN=hisS PE=3 SV=1								10	10	10	27.9	27.9	27.9	47.629	0	43.843	743170000	15	18.7896	18.9022	19.5871	18.8898	19.1424	19.3492	18.911	18.7398	18.798	19.0034	18.8351	18.9659	19.2039	19.0783	19.4436	19.5988	18.9741	18.8571	19.4299	19.1611
Q6LYL6		0.249861	0.120421		0.115269	-0.101806		Possible molybdenum ABC transporter, solute-binding protein OS=Methanococcus maripaludis (strain S2 / LL) OX=267377 GN=modA PE=4 SV=1								9	9	9	47	47	47	31.03	0	68.999	1470700000	22	17.6975	18.265	17.9228	18.0477	18.0835	17.3549	17.9724	17.9107	17.6788	17.7955	20.1919	19.1988	19.5947	19.7693	19.516	20.3453	19.5791	19.1467	20.2253	19.6818
Q6LYN5		0.645672	0.119475		0.653169	-0.0622476		Succinate--CoA ligase [ADP-forming] subunit alpha OS=Methanococcus maripaludis (strain S2 / LL) OX=267377 GN=sucD PE=3 SV=1								5	5	5	23.6	23.6	23.6	30.506	0	15.687	544800000	9	18.7403	18.4443	18.5857	18.416	18.6868	18.4419	18.5201	18.379	18.3798	18.5182	18.4618	18.3425	18.4165	18.3954	18.4402	18.4028	18.5577	18.5341	18.4847	18.3543
Q6LYM1		0.475925	0.118442		0.844321	-0.0892506		DNA ligase OS=Methanococcus maripaludis (strain S2 / LL) OX=267377 GN=lig PE=3 SV=1								3	3	3	6.5	6.5	6.5	65.751	0	7.357	85776000	4	16.6956	16.9751	16.5259	16.7556	16.5789	16.7043	16.4271	16.696	16.5208	16.6023	16.9944	16.9028	16.8908	17.0021	17.0879	17.1119	16.9251	17.0654	16.9192	16.9848
Q6LYC4		0.161961	0.115696		0.399409	-0.132971		Uncharacterized iron-sulfur protein MMP1067 OS=Methanococcus maripaludis (strain S2 / LL) OX=267377 GN=MMP1067 PE=3 SV=1								2	2	2	6.3	6.3	6.3	56.112	0	11.236	36274000	3	15.1011	14.7713	15.287	14.4291	15.1051	15.6539	14.9878	14.8739	14.5748	15.1473	15.7867	15.1865	15.8396	15.7619	15.7433	15.7385	15.8399	15.5628	15.7771	15.8286
Q6M1B4		0.662029	0.11567		0.0889725	-0.0148989		UPF0425 pyridoxal phosphate-dependent protein MMP0002 OS=Methanococcus maripaludis (strain S2 / LL) OX=267377 GN=MMP0002 PE=3 SV=1								5	5	5	17.5	17.5	17.5	39.102	0	15.881	116690000	7	15.5863	15.4615	15.6003	15.3008	15.4667	15.5471	15.4006	15.6132	15.2738	15.3757	17.4642	17.3682	17.5331	17.3477	17.4023	17.5127	17.4493	17.5916	17.5169	17.5675
Q6LYB5		0.37112	0.11543		0.460694	-0.167211		Bifunctional protein GlmU OS=Methanococcus maripaludis (strain S2 / LL) OX=267377 GN=MMP1076 PE=3 SV=1								1	1	1	3.6	3.6	3.6	45.282	0	6.0526	43041000	2	16.0597	15.7877	16.1736	15.6037	16.0414	15.7904	16.1338	15.8279	15.9523	15.9629	15.2293	14.6677	15.198	15.3549	15.0392	15.3073	15.2678	14.8849	15.3391	15.1129
Q6LXB6		0.682471	0.114287		0.319183	-0.0613406		Cell division protein FtsZ OS=Methanococcus maripaludis (strain S2 / LL) OX=267377 GN=ftsZ PE=3 SV=1								31	31	31	68.1	68.1	68.1	38.31	0	170.37	7998600000	60	20.538	20.6174	20.9096	20.5427	20.6587	20.6419	20.5179	20.5542	20.529	20.589	21.4579	21.4134	21.2455	21.4497	21.4392	21.2556	21.6247	21.4049	21.4277	21.4408
P61003		1.56323	0.114118		0.490366	-0.180816		Histidinol-phosphate aminotransferase OS=Methanococcus maripaludis (strain S2 / LL) OX=267377 GN=hisC PE=3 SV=1								7	7	7	27.5	27.5	27.5	42.245	0	30.518	278100000	8	17.4523	17.4531	17.4205	17.3493	17.3092	17.3303	17.4469	17.2767	17.2549	17.4207	15.987	15.7486	16.4701	16.32	16.3306	16.4355	16.2978	15.9787	16.1336	16.164
Q6LZS8		0.93969	0.113516		0.449053	0.061703		MoCF_biosynth domain-containing protein OS=Methanococcus maripaludis (strain S2 / LL) OX=267377 GN=MMP0545 PE=4 SV=1								10	10	10	23.1	23.1	23.1	68.236	0	32.22	422150000	16	18.6794	18.7461	18.537	18.5841	18.4857	18.4023	18.6015	18.6094	18.5609	18.5061	18.8035	18.5661	18.6455	18.6411	18.6698	18.5803	18.587	18.6873	18.4945	18.5898
P61527		0.975099	0.11232		0.0736953	0.0221395		Argininosuccinate synthase OS=Methanococcus maripaludis (strain S2 / LL) OX=267377 GN=argG PE=3 SV=1								19	19	19	46.9	46.9	46.9	44.58	0	101.15	5964400000	42	20.9664	20.9342	21.0476	20.9121	20.9893	20.955	20.8187	20.7795	20.768	20.8529	19.688	20.0853	20.1319	20.0389	19.8514	20.0582	19.9401	19.8242	19.9645	19.9171
Q6M102		0.571788	0.112261		0.0010648	0.000377973		N-acetyl-gamma-glutamyl-phosphate reductase OS=Methanococcus maripaludis (strain S2 / LL) OX=267377 GN=argC PE=3 SV=1								12	12	12	51	51	51	37.783	0	113.1	1176000000	24	18.7216	18.7793	19.0505	18.728	18.8142	18.9159	18.6486	18.6995	18.6231	18.7776	19.4383	19.75	19.435	19.4027	19.5273	19.4707	19.3672	19.7384	19.7381	19.5671
Q6LXX8		1.08191	0.110039		0.861724	0.104359		Conserved hypothetical archaeal protein OS=Methanococcus maripaludis (strain S2 / LL) OX=267377 GN=MMP1217 PE=4 SV=1								9	9	8	37.9	37.9	35.6	24.583	0	18.043	334990000	13	17.8685	17.852	17.9896	17.9145	17.7324	17.6979	17.7753	17.7983	17.8414	17.7874	17.8854	18.1254	18.0257	17.902	17.9978	17.9904	17.8277	17.8622	17.8665	17.9073
Q6LX52		0.778983	0.109728		0.61362	-0.106589		Cell division protein FtsZ OS=Methanococcus maripaludis (strain S2 / LL) OX=267377 GN=ftsz2 PE=3 SV=1								21	21	21	66.8	66.8	66.8	38.551	0	132.57	13021000000	59	21.2864	21.2799	21.5068	21.1773	21.2137	21.3935	21.159	21.293	21.2514	21.2745	21.6217	21.5245	21.3894	21.4358	21.7236	21.5019	21.6926	21.6707	21.6862	21.5531
Q6M122		0.46727	0.107613		0.174229	0.0530599		Aminotran_1_2 domain-containing protein OS=Methanococcus maripaludis (strain S2 / LL) OX=267377 GN=MMP0096 PE=4 SV=1								6	6	6	18.5	18.5	18.5	45.249	0	22.459	259440000	9	16.57	16.7866	17.0833	16.6224	16.7664	16.7429	16.6203	16.722	16.7604	16.6992	16.4103	16.6795	16.7791	16.4506	16.6383	16.8543	16.565	16.4519	16.4593	16.5238
Q6LZP8		0.414095	0.105632		0.40837	0.0888503		4-hydroxy-tetrahydrodipicolinate synthase OS=Methanococcus maripaludis (strain S2 / LL) OX=267377 GN=dapA PE=3 SV=1								11	11	11	47.1	47.1	47.1	31.584	0	46.462	1630400000	19	19.3701	19.2693	19.4094	19.2546	19.3315	19.565	19.1433	19.0771	19.0922	19.2646	19.3729	19.6437	19.8123	19.4351	19.525	19.6626	19.5153	19.4452	19.5416	19.5562
Q6LZA0		0.387235	0.104246		0.280891	-0.12439		UvrABC system protein A OS=Methanococcus maripaludis (strain S2 / LL) OX=267377 GN=uvrA PE=3 SV=1								29	29	29	37.2	37.2	37.2	106.28	0	138.13	2295900000	45	19.6727	19.2843	19.3475	19.5513	19.1008	19.2981	19.2933	19.3241	19.4161	19.3801	19.8308	19.4848	20.3609	20.0415	19.992	20.1331	20.1818	19.9454	19.8056	19.9549
Q6LXH6		0.532705	0.101923		0.338261	0.102936		SAM (And some other nucleotide) binding motif OS=Methanococcus maripaludis (strain S2 / LL) OX=267377 GN=MMP1375 PE=4 SV=1								6	6	6	28.1	28.1	28.1	32.587	0	20.722	197480000	7	16.6576	16.5877	16.7164	16.4902	16.586	16.4991	16.6726	16.7335	16.3304	16.5045	17.8794	18.0843	18.2596	18.0641	17.9683	18.2686	17.8274	17.7451	17.9555	17.9544
Q6LWM9		0.277749	0.101714		0.550519	0.108407		Glutamine--fructose-6-phosphate aminotransferase [isomerizing] OS=Methanococcus maripaludis (strain S2 / LL) OX=267377 GN=glmS PE=1 SV=2								12	12	12	22	22	22	67.137	0	43.949	965440000	19	18.4048	18.3762	18.8361	18.3925	18.5759	18.7701	18.255	18.3175	18.3129	18.4524	18.7299	19.0822	19.009	18.9607	18.8019	18.7919	18.9073	18.6701	18.8597	18.8298
Q6LYD1		0.275182	0.101391		1.28546	0.166424		Cysteine--tRNA ligase OS=Methanococcus maripaludis (strain S2 / LL) OX=267377 GN=cysS PE=3 SV=1								4	4	4	10.3	10.3	10.3	55.408	0	12.303	158840000	5	16.4953	16.9003	16.4651	16.6372	16.443	16.6474	16.1418	16.7028	16.5409	16.6104	15.4872	15.4288	15.4254	15.3784	15.4455	15.2045	15.1279	15.2326	15.2955	15.4042
Q6LZH2		0.226286	0.0994132		0.10328	0.0265477		Uncharacterized protein OS=Methanococcus maripaludis (strain S2 / LL) OX=267377 GN=MMP0656 PE=4 SV=1								5	5	5	36.6	36.6	36.6	21.076	0	37.846	437440000	9	16.9423	16.9323	16.9416	16.7409	16.9428	17.3848	16.5927	16.591	16.7838	17.0065	18.5506	18.5386	18.3274	18.3862	18.4578	18.3486	18.3514	18.7147	18.4152	18.5106
Q6LZG8		0.532507	0.0981779		2.93041	-0.147567		Adenine phosphoribosyltransferase OS=Methanococcus maripaludis (strain S2 / LL) OX=267377 GN=apt2 PE=3 SV=1								4	4	4	41.3	41.3	41.3	18.982	0	20.906	274870000	6	16.8307	16.7291	16.8957	16.7354	16.9456	16.7495	16.6365	16.5425	16.7126	17.0156	16.9053	16.9364	16.9766	17.1063	17.0897	17.1077	17.1408	17.046	17.0315	16.9442
Q6LZP6		0.418473	0.0979748		0.400916	0.144643		Chorismate mutase domain-containing protein OS=Methanococcus maripaludis (strain S2 / LL) OX=267377 GN=aroQ PE=4 SV=1								3	3	3	24	24	24	11.105	0	18.669	240990000	4	17.6676	17.487	17.6206	17.5216	17.5291	17.7662	17.2852	17.4963	17.364	17.563	15.9848	16.6888	16.4367	16.2484	16.1649	16.5002	16.191	16.0767	16.1713	16.2678
Q6LZP0		0.449787	0.0978584		1.41527	0.158388		Valine--tRNA ligase OS=Methanococcus maripaludis (strain S2 / LL) OX=267377 GN=valS PE=3 SV=1								24	24	24	32.3	32.3	32.3	102.04	0	96.401	3117100000	39	20.0243	20.1875	20.4486	20.0531	20.2492	20.2328	20.0628	20.1029	20.0326	20.1763	20.0459	20.1121	20.2293	20.0512	20.0349	19.9832	20.0114	19.8218	19.9215	19.9872
Q6LY76		0.604991	0.0976582		0.097789	-0.0170886		TRANSKETOLASE_1 domain-containing protein OS=Methanococcus maripaludis (strain S2 / LL) OX=267377 GN=MMP1115 PE=4 SV=1								5	5	5	18.5	18.5	18.5	30.263	0	13.331	489780000	8	18.2994	18.2943	18.5127	18.2126	18.3063	18.3631	18.2287	18.3957	18.1205	18.2848	18.1315	17.9517	18.1838	18.0467	18.1938	18.2097	18.0561	18.0479	18.0824	18.0828
Q6M070		0.381931	0.0976327		0.162972	-0.0666911		Meth_synt_2 domain-containing protein OS=Methanococcus maripaludis (strain S2 / LL) OX=267377 GN=metE PE=4 SV=1								5	5	5	21.2	21.2	21.2	34.83	0	20.443	348200000	9	17.4253	17.2844	17.1303	17.3139	17.236	17.4172	17.05	17.0409	17.0361	17.2777	17.3949	17.2093	17.8807	17.4622	17.5727	17.8494	17.5512	17.4983	17.436	17.5666
Q6LWW1		0.544471	0.0963424		0.353987	0.100303		DUF1743 domain-containing protein OS=Methanococcus maripaludis (strain S2 / LL) OX=267377 GN=MMP1593 PE=4 SV=1								4	4	4	8.6	8.6	8.6	33.129	0	11.598	557540000	7	18.4122	18.093	18.3682	18.1414	18.2532	18.0594	18.2993	18.2346	18.1807	18.1072	18.2282	18.3828	18.7524	18.4107	18.3597	18.5562	18.2686	18.2526	18.2772	18.3258
Q6M089		0.374081	0.0938387		0.563659	0.193302		RNase L inhibitor OS=Methanococcus maripaludis (strain S2 / LL) OX=267377 GN=MMP0382 PE=4 SV=1								6	6	6	16.3	16.3	16.3	65.929	0	25.915	206590000	7	16.7786	16.846	16.7856	16.818	16.8826	16.5799	16.8765	16.6726	16.4277	16.7223	17.1403	17.1291	17.8034	17.1351	17.2429	17.366	17.0776	17.1207	17.0436	17.1984
Q6LX87		0.270048	0.0918841		0.563201	0.0797122		Uncharacterized protein OS=Methanococcus maripaludis (strain S2 / LL) OX=267377 GN=ehaR PE=4 SV=1								2	2	2	7.1	7.1	7.1	28.164	0	4.6104	201120000	3	16.2799	16.37	15.9603	16.0502	15.9044	15.9823	16.275	16.4161	16.0412	16.1777	15.4135	15.4262	15.5096	15.4043	15.4514	15.4162	15.2045	15.4726	15.2717	15.293
Q6LY73		0.311885	0.0917177		0.506866	0.207763		Uncharacterized protein OS=Methanococcus maripaludis (strain S2 / LL) OX=267377 GN=MMP1118 PE=4 SV=1								2	2	2	18.1	18.1	18.1	12.235	0	6.7893	423560000	4	17.2916	17.1862	17.5699	17.3607	17.1936	17.4953	16.995	17.2332	17.2675	17.1985	18.0218	18.1104	17.6966	17.8934	17.8662	17.1607	17.9003	17.8489	17.7415	17.884
Q6M0F3		0.391285	0.0907211		0.0254458	0.0132208		Dihydroxy-acid dehydratase OS=Methanococcus maripaludis (strain S2 / LL) OX=267377 GN=ilvD PE=3 SV=1								17	17	16	33.3	33.3	33.1	58.717	0	73.999	3294200000	30	20.7041	20.5703	20.3524	20.5223	20.5607	20.5951	20.4277	20.3289	20.2744	20.4745	19.716	20.1169	20.3362	20.0972	19.9953	20.3943	20.1256	19.7303	19.9162	20.0633
Q6LZH1		0.391509	0.0851545		0.238862	0.101989		UPF0237 protein MMP0657 OS=Methanococcus maripaludis (strain S2 / LL) OX=267377 GN=MMP0657 PE=3 SV=1								3	3	3	50	50	50	10.045	0	10.016	136050000	4	16.9508	16.7836	17.1195	16.6985	16.8877	17.0066	16.8969	16.9629	16.7442	17.0976	17.4093	17.509	18.1857	17.5179	17.686	17.775	17.6219	17.4626	17.5327	17.7139
Q6M0E9		0.608938	0.0825713		0.234065	0.0319961		Replication factor C large subunit OS=Methanococcus maripaludis (strain S2 / LL) OX=267377 GN=rfcL PE=3 SV=1								9	9	9	26.5	26.5	26.5	54.501	0	24.143	678950000	11	18.2709	18.3474	18.3489	18.1296	18.2296	18.411	18.1341	18.2935	18.2412	18.3038	18.3758	18.2331	18.2133	18.1683	18.2744	18.1435	18.2607	18.3458	18.2598	18.2591
Q6LXV6		0.412885	0.0823568		0.509135	-0.137431		O-phospho-L-seryl-tRNA:Cys-tRNA synthase OS=Methanococcus maripaludis (strain S2 / LL) OX=267377 GN=MMP1240 PE=3 SV=1								12	12	12	32.1	32.1	32.1	43.376	0	31.101	523530000	17	19.0401	18.994	18.9949	18.9478	19.0097	19.1394	18.7174	18.8108	18.9385	18.9378	17.3574	17.51	17.8076	17.4694	17.752	17.8398	17.5637	17.8472	17.7024	17.6681
Q6M173		0.766242	0.0817709		0.116087	0.0502208		Ribonuclease J OS=Methanococcus maripaludis (strain S2 / LL) OX=267377 GN=rnj PE=3 SV=1								16	16	16	50.9	50.9	50.9	49.796	0	56.281	1637700000	26	19.8198	19.677	19.6075	19.588	19.6675	19.5393	19.5845	19.6913	19.6471	19.6643	19.5581	19.5755	20.0201	19.3869	19.7013	19.9701	19.4603	19.7875	19.6998	19.6827
Q6M0X3		0.22595	0.0803499		1.23284	-0.230111		Hypoxanthine/guanine phosphoribosyltransferase OS=Methanococcus maripaludis (strain S2 / LL) OX=267377 GN=hpt PE=1 SV=1								6	6	6	36.8	36.8	36.8	20.402	0	21.181	412800000	11	17.4788	17.3631	17.8826	17.6127	17.5662	17.3273	17.6694	17.545	17.2465	17.454	18.4615	18.6286	18.9095	18.7603	18.806	18.9941	18.9251	18.9289	18.9654	18.8745
Q6LZH7		0.193893	0.0797828		0.247009	0.0327826		ACT domain-containing protein OS=Methanococcus maripaludis (strain S2 / LL) OX=267377 GN=ilvN PE=4 SV=1								10	10	10	66.3	66.3	66.3	18.875	0	65.621	1030800000	14	17.9484	17.9544	18.4207	18.0286	18.1429	18.3582	17.7604	17.8484	18.0297	18.0362	18.4042	18.4764	18.5372	18.4375	18.3009	18.4897	18.5118	18.502	18.397	18.4879
Q6LWT7		0.313294	0.0782959		0.0617226	0.0179866		MoCF_biosynth domain-containing protein OS=Methanococcus maripaludis (strain S2 / LL) OX=267377 GN=MMP1619 PE=4 SV=1								3	3	3	12.4	12.4	12.4	45.1	0	12.36	125890000	5	14.7725	14.4848	14.4966	14.4717	14.5045	14.6959	14.2888	14.4407	14.6366	14.5503	17.5918	17.3014	17.5807	17.5532	17.3508	17.6067	17.6326	17.3739	17.3227	17.4566
Q6LY93		0.155579	0.0782652		0.491074	0.317973		Phosphate import ATP-binding protein PstB OS=Methanococcus maripaludis (strain S2 / LL) OX=267377 GN=pstB PE=3 SV=1								2	2	2	8.8	8.8	8.8	28.619	0	4.401	61762000	4	14.9795	14.8888	15.7743	15.0796	15.1629	15.3256	15.0275	15.1201	15.1001	15.1678	14.145	15.4206	15.1832	14.6219	14.8022	14.6605	14.2027	14.8988	14.4038	14.7213
P60807		0.46081	0.077397		0.0893211	-0.0379616		ATP phosphoribosyltransferase OS=Methanococcus maripaludis (strain S2 / LL) OX=267377 GN=hisG PE=3 SV=1								12	12	12	44.4	44.4	44.4	31.56	0	38.44	775300000	17	19.067	19.2331	19.1509	19.0789	19.1413	19.187	18.8913	19.1636	18.9757	19.0517	18.9574	19.3934	19.5456	19.3872	19.3028	19.6244	19.3466	19.0897	19.27	19.3039
Q6LY77		0.433008	0.0770057		1.10394	-0.290992		Ribulose-phosphate 3-epimerase OS=Methanococcus maripaludis (strain S2 / LL) OX=267377 GN=rpe PE=3 SV=1								4	4	4	29.7	29.7	29.7	24.022	0	27.672	347210000	8	17.4466	17.7478	17.6961	17.565	17.6544	17.5543	17.4532	17.64	17.4519	17.5909	16.926	16.5125	16.4752	16.6535	17.1089	16.8165	16.8837	17.0533	17.0576	16.824
Q6M0H5		0.218614	0.0770048		0.811022	0.141322		Homoserine kinase OS=Methanococcus maripaludis (strain S2 / LL) OX=267377 GN=thrB PE=1 SV=1								7	7	7	24.6	24.6	24.6	32.453	0	35.022	641910000	13	18.0654	18.0489	18.2671	17.8201	18.0786	18.4255	17.8805	18.1692	17.9268	18.0279	18.7251	18.5914	18.4627	18.4285	18.4414	18.2824	18.4121	18.6596	18.4865	18.4557
Q6M0Y3		0.376817	0.0768471		0.0583982	0.0287361		Threonine synthase OS=Methanococcus maripaludis (strain S2 / LL) OX=267377 GN=thrC PE=3 SV=1								16	16	16	45.5	45.5	45.5	43.781	0	96.415	3490600000	32	20.6744	20.6495	20.659	20.4808	20.7517	20.7962	20.5374	20.4643	20.4743	20.6262	20.125	20.738	20.7379	20.6214	20.3295	20.6997	20.548	20.2181	20.6127	20.5139
Q6LX53		0.204653	0.0758939		0.208373	0.0768344		Conserved hypothetical archaeal protein OS=Methanococcus maripaludis (strain S2 / LL) OX=267377 GN=MMP1499 PE=4 SV=1								3	3	3	15.3	15.3	15.3	18.994	0	5.5109	164650000	5	16.2268	16.5262	16.3789	16.5732	16.2631	16.3987	15.9013	16.2492	16.4231	16.329	17.6202	16.9931	17.1301	17.2771	17.1023	16.9882	17.3199	17.2595	17.0787	17.2424
Q6LYI5		0.137331	0.075765		0.454735	0.105292		Anthranilate synthase component 1 OS=Methanococcus maripaludis (strain S2 / LL) OX=267377 GN=trpE PE=3 SV=1								8	8	8	18.9	18.9	18.9	49.77	0	36.017	249670000	14	15.9998	16.9747	16.4011	16.3711	16.6323	16.2341	16.2339	16.5325	16.2927	16.3224	16.3078	16.3648	16.2149	16.5091	16.1756	16.1614	16.1589	15.995	16.1434	16.0578
Q6LWT3		0.388825	0.0731808		0.226208	0.076471		Ferredoxin OS=Methanococcus maripaludis (strain S2 / LL) OX=267377 GN=ehbL PE=4 SV=1								4	4	4	24.7	24.7	24.7	19.054	0	9.6246	833760000	6	16.5405	16.3043	16.6402	16.3364	16.5219	16.4897	16.3496	16.4884	16.345	16.4074	17.7982	18.3139	18.3294	18.1208	17.9551	18.229	18.1866	18.0092	17.9235	18.0991
Q6LY45		0.222825	0.069363		1.30189	-0.238837		Sm domain-containing protein OS=Methanococcus maripaludis (strain S2 / LL) OX=267377 GN=MMP1148 PE=4 SV=1								2	2	2	40.3	40.3	40.3	8.1524	0	6.6493	317010000	4	16.917	16.4553	16.6308	16.8244	16.61	16.4923	16.7022	16.4027	16.5586	16.6996	16.8357	16.8991	17.2665	17.1043	17.3306	17.3058	17.188	17.2391	17.2682	17.124
P60820		0.618728	0.0686146		0.269713	-0.111808		Selenide, water dikinase OS=Methanococcus maripaludis (strain S2 / LL) OX=267377 GN=selD PE=3 SV=2								6	6	6	24.2	24.2	24.2	36.151	0	26.576	424110000	10	17.4914	17.4794	17.5682	17.4452	17.5327	17.4835	17.3931	17.5073	17.3046	17.4138	17.283	17.5767	17.9986	17.6001	17.7179	17.6818	17.9541	17.9261	17.5076	17.642
Q6LXS7		0.283015	0.0679951		0.376027	0.169466		2-oxoisovalerate oxidoreductase subunit alpha OS=Methanococcus maripaludis (strain S2 / LL) OX=267377 GN=vorA PE=4 SV=1								9	9	9	20.3	20.3	20.3	51.781	0	26.35	629420000	12	18.0208	18.3982	18.1856	18.1572	18.2912	18.0029	18.1535	18.2101	17.9864	18.0907	17.2909	17.6764	18.0927	17.6428	17.5239	17.8264	17.5549	17.2636	17.2916	17.4137
Q6LWR9		0.497396	0.0679407		0.0880431	0.055179		Conserved hypothetical archaeal protein OS=Methanococcus maripaludis (strain S2 / LL) OX=267377 GN=MMP1637 PE=4 SV=1								11	11	11	50.9	50.9	50.9	25.026	0	65.227	9163300000	33	21.1573	21.1779	21.1942	21.0163	20.9995	21.0442	21.133	21.2523	21.2058	21.1188	21.3533	21.3346	20.455	20.8051	21.1775	20.6992	21.0048	21.2107	21.0574	21.0534
Q6LWR4		0.255787	0.0661879		0.841782	0.133673		Uncharacterized protein OS=Methanococcus maripaludis (strain S2 / LL) OX=267377 GN=MMP1643 PE=4 SV=1								9	9	9	51.2	51.2	51.2	14.395	0	44.361	7139000000	21	20.7907	20.6122	20.6258	20.5758	20.5925	20.3808	20.8875	20.6781	20.5455	20.524	20.7183	21.0572	20.7444	20.7338	20.7503	20.7097	20.7854	20.6134	20.6451	20.7488
Q6LZM7		0.249906	0.0652116		0.539391	0.175993		Fibrillarin-like rRNA/tRNA 2-O-methyltransferase OS=Methanococcus maripaludis (strain S2 / LL) OX=267377 GN=flpA PE=3 SV=1								6	6	6	38.3	38.3	38.3	26.026	0	22.26	486890000	7	16.5902	16.6928	16.797	16.7687	16.8673	16.5475	16.5921	16.3957	16.5971	16.5853	17.369	17.4925	18.0301	17.5115	17.4925	17.6601	17.3638	17.3988	17.3003	17.4902
Q6LY78		0.153948	0.0631415		0.0685121	-0.0192808		Transket_pyr domain-containing protein OS=Methanococcus maripaludis (strain S2 / LL) OX=267377 GN=MMP1113 PE=4 SV=1								8	8	8	33.3	33.3	33.3	33.677	0	37.789	1178600000	18	18.6456	18.7772	19.165	18.634	18.9262	19.1338	18.8089	18.6806	18.6132	18.8391	18.9119	18.8833	19.2651	18.8617	19.0418	19.1369	18.9868	19.1132	19.0958	19.0779
Q6LZ90		0.213836	0.0626699		0.842636	0.363854		Asp/Glu racemase:Aspartate racemase OS=Methanococcus maripaludis (strain S2 / LL) OX=267377 GN=MMP0739 PE=4 SV=1								2	2	2	8.1	8.1	8.1	26.283	0.0010707	3.6592	48837000	2	14.806	14.8357	14.95	14.7865	14.9736	15.048	14.5115	14.7176	14.7703	14.7762	15.1291	15.3043	14.3754	14.6375	14.8851	14.3482	14.3663	14.6125	14.5849	14.6215
Q6LXI0		0.262997	0.062067		0.26444	0.0627847		30S ribosomal protein S10 OS=Methanococcus maripaludis (strain S2 / LL) OX=267377 GN=rps10 PE=3 SV=1								3	3	3	23.5	23.5	23.5	11.545	0	9.5915	1238000000	4	19.0886	19.0716	18.8988	19.1534	18.9637	18.7481	19.0516	19.0065	18.8224	18.975	14.7308	15.0655	15.0704	14.8861	14.8078	15.0834	14.8252	14.8021	14.9519	14.7109
Q6M0C6		0.188344	0.0611763		0.996858	-0.147084		PBP_domain domain-containing protein OS=Methanococcus maripaludis (strain S2 / LL) OX=267377 GN=MMP0345 PE=4 SV=1								9	9	9	44.4	44.4	44.4	30.027	0	36.85	731050000	16	18.2559	18.0889	17.6249	17.9924	18.0002	17.8542	17.9314	17.9037	17.8903	18.0497	18.8097	18.459	18.7159	18.8143	18.8335	18.7144	18.7772	18.9	18.8124	18.7445
Q6M126		0.486632	0.060475		1.58629	-0.131965		DNA-directed RNA polymerase subunit F OS=Methanococcus maripaludis (strain S2 / LL) OX=267377 GN=rpoF PE=4 SV=1								6	6	6	63.6	63.6	63.6	12.381	0	35.008	2567900000	10	19.3667	19.2545	19.4983	19.2981	19.3905	19.3607	19.2438	19.2603	19.3228	19.3057	18.5906	18.5901	18.5994	18.703	18.8272	18.7293	18.6857	18.6105	18.7963	18.6511
Q6LYK8		0.0643125	0.0593885		0.405855	0.252387		Acetyl-CoA decarbonylase/synthase complex subunit beta OS=Methanococcus maripaludis (strain S2 / LL) OX=267377 GN=cdhB PE=3 SV=1								25	25	25	40.9	40.9	40.9	51.019	0	141.27	15649000000	69	21.3885	21.5525	22.4823	21.429	22.0809	22.3552	21.3192	21.8065	21.4994	21.8279	21.0096	22.1359	22.2332	21.6698	21.3501	21.6888	21.6567	21.5824	21.2953	21.662
Q6LXX9		0.103361	0.0578445		0.167053	0.0675756		Probable cobyric acid synthase OS=Methanococcus maripaludis (strain S2 / LL) OX=267377 GN=cobQ PE=3 SV=1								2	2	2	6.5	6.5	6.5	54.58	0	8.4056	99086000	4	14.7584	15.216	15.5565	15.4881	14.9815	14.7988	15.1779	15.2313	15.0372	15.1192	15.1851	15.5792	15.5694	15.4319	15.2405	15.7683	15.1883	15.1975	15.4356	15.2405
Q6M032		0.230764	0.0575622		2.52017	-0.278856		S1 motif domain-containing protein OS=Methanococcus maripaludis (strain S2 / LL) OX=267377 GN=MMP0440 PE=4 SV=1								5	5	5	31.6	31.6	31.6	21.03	0	30.508	479290000	8	17.7022	17.6552	17.9436	17.503	17.8622	17.8558	17.6181	17.7178	17.6997	17.7618	17.3399	17.4388	17.42	17.6442	17.7563	17.5971	17.5597	17.8259	17.6873	17.5826
Q6LYP8		0.132687	0.0565176		0.293641	0.0944157		Related to ehbP of Methanothermobacter thermautotrophicus OS=Methanococcus maripaludis (strain S2 / LL) OX=267377 GN=MMP0940 PE=4 SV=1								4	4	4	44.2	44.2	44.2	10.896	0	18.372	242070000	10	16.4637	16.4381	17.0169	16.3963	16.6306	16.9025	16.5055	16.5543	16.5089	16.5851	16.8762	17.5404	17.0435	17.0574	17.1033	16.9906	17.0339	17.155	17.0135	17.1771
Q6LYU4		0.194464	0.0557461		2.21381	0.364676		CTP synthase OS=Methanococcus maripaludis (strain S2 / LL) OX=267377 GN=pyrG PE=3 SV=1								14	14	14	27.6	27.6	27.6	59.546	0	38.52	1265300000	22	19.3152	19.5864	19.6664	19.4568	19.4875	19.7543	19.3535	19.3611	19.3883	19.4703	19.4765	19.7812	19.7987	19.2851	19.394	19.4538	19.2725	19.3701	19.1493	19.4604
Q6LY24		0.422493	0.0517346		0.0273799	0.0036087		Uncharacterized protein OS=Methanococcus maripaludis (strain S2 / LL) OX=267377 GN=MMP1169 PE=4 SV=1								18	18	18	56	56	56	46.415	0	83.863	6748300000	43	20.639	20.5896	20.6076	20.4989	20.5705	20.4406	20.6193	20.6973	20.5353	20.5071	20.3732	20.4521	20.3862	20.3972	20.4997	20.3845	20.358	20.4607	20.3016	20.3177
Q6M0X2		0.201503	0.0514061		0.42038	0.092226		Uncharacterized protein OS=Methanococcus maripaludis (strain S2 / LL) OX=267377 GN=MMP0146 PE=4 SV=1								4	4	4	10.9	10.9	10.9	52.989	0	13.958	156980000	7	15.626	15.4924	15.9472	15.6939	15.604	15.7479	15.5953	15.5106	15.6712	15.5937	17.1841	17.3259	17.489	17.125	17.4178	17.0531	17.2454	17.2736	17.33	17.3023
Q6LXK1		0.166489	0.0506986		0.386799	-0.096976		NH(3)-dependent NAD(+) synthetase OS=Methanococcus maripaludis (strain S2 / LL) OX=267377 GN=nadE PE=3 SV=1								10	10	10	44.2	44.2	44.2	28.562	0	50.703	634840000	19	17.8595	17.7363	17.7139	17.669	17.7178	18.0447	17.4991	17.5785	17.806	17.7196	18.8953	18.4967	18.5802	18.6774	18.6781	18.6319	18.9086	18.9281	18.7022	18.8103
Q6LYI8		0.0891309	0.0500765		0.0674156	-0.0544167		Tryptophan synthase beta chain OS=Methanococcus maripaludis (strain S2 / LL) OX=267377 GN=trpB PE=3 SV=1								8	8	8	23.9	23.9	23.9	43.154	0	24.055	932410000	15	19.3029	20.2206	19.7114	19.8615	19.6796	19.4768	19.6272	19.9612	19.563	19.7072	18.7297	18.2631	18.3563	19.3085	18.3698	18.3125	18.7709	18.1472	18.1158	18.5123
Q6LXE2		0.12761	0.0470988		0.360942	-0.102037		50S ribosomal protein L24 OS=Methanococcus maripaludis (strain S2 / LL) OX=267377 GN=rpl24 PE=3 SV=1								11	11	11	60.5	60.5	60.5	13.394	0	26.245	3504100000	19	20.415	20.2784	20.1286	20.2171	20.2333	19.8312	20.472	20.339	20.2689	20.2125	19.9935	19.8642	20.3038	20.2262	20.1406	20.343	20.0383	19.9366	20.2508	20.0743
Q6LZC0		0.0533065	0.0449664		0.210618	-0.138175		Uncharacterized protein OS=Methanococcus maripaludis (strain S2 / LL) OX=267377 GN=MMP0709 PE=4 SV=1								1	1	1	4.5	4.5	4.5	21.531	0.0097847	2.326	64243000	2	14.0544	14.4575	15.4216	14.4901	14.8186	14.7964	14.4437	14.2737	14.7746	14.7889	15.8676	15.5578	15.8147	15.7373	15.4325	15.4859	15.9765	16.5717	16.1055	15.7775
Q6LX00		0.144365	0.0449413		0.930107	0.343374		Radical_SAM domain-containing protein OS=Methanococcus maripaludis (strain S2 / LL) OX=267377 GN=MMP1554 PE=4 SV=1								5	5	5	17.9	17.9	17.9	48.902	0	14.447	316500000	7	17.0992	17.2335	16.9854	17.0881	17.0353	16.8138	17.3042	17.2146	16.9106	16.9865	17.8036	18.2466	18.3091	17.9635	17.6478	18.1388	17.9149	17.5586	17.4347	17.9137
Q6LZL7		0.146701	0.0438525		0.160182	-0.0353896		Global nitrogen regulator NrpR OS=Methanococcus maripaludis (strain S2 / LL) OX=267377 GN=nrpR PE=1 SV=1								13	13	13	31.2	31.2	31.2	59.601	0	55.675	818070000	16	18.6287	18.6012	18.3778	18.4241	18.4876	18.8312	18.4001	18.3684	18.441	18.6145	19.0661	18.75	18.8886	18.8629	18.9482	18.7893	18.9476	19.0857	18.9882	18.9465
Q6M0W1		0.188755	0.0415761		0.0609497	0.0502539		DNA-binding protein MMP0157 OS=Methanococcus maripaludis (strain S2 / LL) OX=267377 GN=MMP0157 PE=3 SV=1								6	6	6	50.4	50.4	50.4	14.026	0	16.632	288930000	9	17.7373	17.7632	17.5573	17.8051	17.538	17.4732	17.7131	17.6028	17.734	17.6083	16.9385	17.9239	18.2444	17.2917	17.6021	18.0203	17.5991	17.6377	17.761	17.6781
Q6LY44		0.282552	0.0403802		0.00547421	0.00318019		3-isopropylmalate dehydratase large subunit OS=Methanococcus maripaludis (strain S2 / LL) OX=267377 GN=leuC PE=3 SV=1								14	14	14	44.8	44.8	44.8	45.408	0	86.359	4758300000	36	20.5473	20.5724	20.5611	20.4875	20.6126	20.5257	20.5622	20.5932	20.3381	20.5398	20.0925	20.6796	20.7571	20.5508	20.4605	20.9399	20.4524	20.2684	20.3673	20.4896
Q6LY07		0.398197	0.0379337		0.362836	-0.068114		Eukaryotic thiol (Cysteine) protease, active site:ATP/GTP-binding site motif A (P-loop):Sigma-54 factor interaction domain:Pu OS=Methanococcus maripaludis (strain S2 / LL) OX=267377 GN=lon PE=3 SV=1								13	13	13	25.1	25.1	25.1	75.87	0	109.91	1091700000	23	18.6152	18.655	18.7697	18.5677	18.6722	18.693	18.6333	18.6037	18.6823	18.6523	19.2415	19.0534	19.3175	19.1185	19.3201	19.3687	19.1581	19.3597	19.3083	19.2489
Q6LYS4		0.0433466	0.0373974		0.30442	0.147916		Conserved hypothetical archaeal protein OS=Methanococcus maripaludis (strain S2 / LL) OX=267377 GN=MMP0914 PE=1 SV=1								7	7	7	33.2	33.2	33.2	26.384	0	25.887	1229700000	14	18.5184	18.5832	18.8481	18.2569	18.5408	19.5332	18.1258	18.6386	18.5796	18.6719	19.1401	19.0723	18.3971	18.5919	18.7419	18.3855	18.8512	19.0529	18.7079	18.7777
Q6M057		0.193467	0.0373255		0.337428	0.118171		Threonine--tRNA ligase OS=Methanococcus maripaludis (strain S2 / LL) OX=267377 GN=thrS PE=3 SV=1								20	20	20	40.5	40.5	40.5	71.468	0	97.432	3699700000	37	20.4313	20.3482	20.6363	20.4509	20.5667	20.3393	20.4182	20.4878	20.3447	20.3887	20.0546	20.4702	20.6181	20.3643	20.2808	20.5202	20.2546	20.034	20.1228	20.2556
Q6LWT2		0.0695121	0.037289		0.320535	0.100568		Polyferredoxin OS=Methanococcus maripaludis (strain S2 / LL) OX=267377 GN=ehbK PE=4 SV=1								5	5	5	9.8	9.8	9.8	53.757	0	11.734	498600000	8	17.8633	17.8209	18.3424	17.832	17.946	18.4133	17.6464	18.1187	17.8729	17.9816	17.7081	18.3016	18.1355	17.9431	17.9123	17.7813	18.0451	18.1031	17.9023	17.92
Q6LYP9		0.0596226	0.0329523		0.375182	0.0676231		Uncharacterized protein OS=Methanococcus maripaludis (strain S2 / LL) OX=267377 GN=MMP0939 PE=4 SV=1								5	5	5	25.8	25.8	25.8	25.289	0	49.734	342990000	8	18.2316	18.3148	18.5677	18.1829	18.3963	18.8763	18.1263	18.4396	18.009	18.3521	16.8505	17.1596	17.1771	16.9025	17.0495	17.029	17.0223	17.0402	16.9252	16.9726
Q6LXU2		0.216758	0.0327911		0.204785	-0.0895573		Phenylalanine--tRNA ligase beta subunit OS=Methanococcus maripaludis (strain S2 / LL) OX=267377 GN=pheT PE=3 SV=1								10	10	10	24.5	24.5	24.5	62.643	0	39.363	771930000	19	19.4384	19.5336	19.4582	19.4615	19.5845	19.4877	19.4387	19.3982	19.2929	19.5069	18.897	19.0031	19.4545	19.2339	19.0292	19.56	19.2975	18.9121	19.2137	19.2462
Q6LWY6		0.143333	0.0326036		0.356927	0.0874017		Conserved hypothetical archaeal protein OS=Methanococcus maripaludis (strain S2 / LL) OX=267377 GN=MMP1568 PE=4 SV=1								5	5	5	27.7	27.7	27.7	20.436	0	13.46	355270000	10	17.8267	18.0423	18.1131	17.9525	17.8903	18.1712	17.8996	17.8718	17.983	17.9538	17.9658	18.307	18.1465	18.0412	18.0552	18.3289	17.9767	17.9664	17.9459	18.0648
Q6LYE7		0.136346	0.0314293		0.142168	0.0494871		V-type ATP synthase alpha chain OS=Methanococcus maripaludis (strain S2 / LL) OX=267377 GN=atpA PE=3 SV=1								30	30	30	61.3	61.3	61.3	64.193	0	202.51	39079000000	113	22.4515	22.1565	22.3754	22.1942	22.4419	22.3173	22.3487	22.3359	22.1404	22.3027	22.8234	23.3799	23.3675	23.1057	23.2516	23.2158	23.0243	23.2021	23.0451	23.1536
Q6LWR3		0.106674	0.0311289		1.15691	0.198865		Conserved hypothetical archaeal protein OS=Methanococcus maripaludis (strain S2 / LL) OX=267377 GN=MMP1644 PE=4 SV=1								2	2	2	13.4	13.4	13.4	30.954	0	6.6982	86451000	3	14.9712	14.715	14.7392	14.5659	14.6711	14.7947	14.7955	14.8002	15.0366	14.9894	15.0902	14.8589	14.6547	14.6634	14.5606	14.6903	14.7336	14.7511	14.6155	14.5267
Q6M146		0.0969648	0.0306153		0.454765	0.1577		DNA primase small subunit PriS OS=Methanococcus maripaludis (strain S2 / LL) OX=267377 GN=priS PE=3 SV=1								3	3	3	7.3	7.3	7.3	42.294	0	4.4239	1043000000	3	15.5073	15.4301	15.4941	15.3184	15.5435	15.4541	15.6075	15.6274	15.1282	15.4443	15.3492	14.9812	14.8282	14.7346	14.923	14.7404	15.1226	15.1501	14.7002	15.057
Q6LZP9		0.176408	0.0302207		0.113117	-0.0512489		Asp-tRNAAsn/Glu-tRNAGln amidotransferase subunit C OS=Methanococcus maripaludis (strain S2 / LL) OX=267377 GN=MMP0575 PE=4 SV=1								4	4	4	82.3	82.3	82.3	9.076	0	12.387	292830000	8	18.4106	18.2573	18.3963	18.4948	18.3141	18.3356	18.2544	18.2051	18.3433	18.2455	17.5246	17.7964	18.2195	18.1079	17.7415	17.8965	18.12	17.7585	17.7639	17.9423
Q6M161		0.0333963	0.0289119		0.493739	-0.306855		5-amino-6-(D-ribitylamino)uracil--L-tyrosine 4-hydroxyphenyl transferase 1 OS=Methanococcus maripaludis (strain S2 / LL) OX=267377 GN=cofH1 PE=3 SV=1								3	2	2	10.9	8.9	8.9	39.823	0	41.546	114760000	3	15.941	15.7869	15.9346	15.7214	15.8357	15.1064	16.2768	16.5327	15.6786	15.9729	11.6076	12.3447	11.521	12.1587	11.5307	12.1575	12.5325	11.879	12.5293	11.4094
Q6M0K6		0.265657	0.0288307		0.775073	-0.278314		Mechanosensitive (MS) ion channel OS=Methanococcus maripaludis (strain S2 / LL) OX=267377 GN=MscMJ PE=4 SV=1								3	3	3	16	16	16	39.898	0	22.456	183420000	5	15.9972	16.0469	15.9426	16.0096	15.9829	15.9291	16.0488	15.8544	15.9756	15.9888	13.2734	13.7813	14.072	13.9336	13.9329	13.8611	14.242	14.1261	13.8275	13.9555
Q6LZQ7		0.150964	0.0276922		0.192001	-0.0872835		Uncharacterized protein OS=Methanococcus maripaludis (strain S2 / LL) OX=267377 GN=MMP0567 PE=4 SV=1								6	6	6	52.6	52.6	52.6	15.688	0	17.725	853800000	9	19.0892	19.0203	19.1949	19.1218	19.2014	19.0303	19.1624	18.9362	18.9905	19.0693	17.5017	17.6119	18.1145	17.6868	17.696	18.2374	17.8847	17.6479	17.8272	17.8
Q6LY01		0.122223	0.0272659		0.189458	0.0440184		Elp3 domain-containing protein OS=Methanococcus maripaludis (strain S2 / LL) OX=267377 GN=MMP1192 PE=4 SV=1								6	6	6	24	24	24	42.792	0	23.183	208870000	8	16.0891	16.0196	16.1307	16.1149	15.9771	15.8864	15.9807	16.274	16.0821	16.1102	15.7421	16.0226	15.9623	15.8205	15.9497	16.0254	15.6686	15.8863	15.8393	15.8705
Q6LZM8		0.0934324	0.0251424		1.11442	0.398415		Nop domain-containing protein OS=Methanococcus maripaludis (strain S2 / LL) OX=267377 GN=MMP0596 PE=4 SV=1								11	11	11	25.6	25.6	25.6	54.221	0	38.291	690590000	16	18.7412	18.6562	18.921	18.8272	18.9197	18.8445	18.5347	18.6676	18.6924	18.8271	17.9909	18.8768	18.4299	17.9619	18.286	18.1039	17.9236	18.0855	17.844	18.128
Q6LZE1		0.0682585	0.0236692		0.0313026	-0.00751972		O-phosphoserine--tRNA(Cys) ligase OS=Methanococcus maripaludis (strain S2 / LL) OX=267377 GN=sepS PE=1 SV=1								11	11	11	25	25	25	61.147	0	44.943	1145300000	15	19.025	19.1359	19.3223	19.1273	19.3133	19.4119	18.9782	19.0109	18.9827	19.0384	18.1729	18.1705	18.4518	18.3379	18.24	18.3613	18.359	18.1356	18.2018	18.255
Q6LXQ4		0.0570144	0.0229692		1.27723	0.282335		Probable glucose-6-phosphate isomerase OS=Methanococcus maripaludis (strain S2 / LL) OX=267377 GN=pgi PE=3 SV=1								3	3	3	6.8	6.8	6.8	49.256	0	5.5862	606850000	4	20.404	20.2602	20.6004	20.2981	20.4054	20.6206	20.3157	20.6593	20.0922	20.4979	16.1479	16.2772	15.8852	15.8255	16.0487	15.7675	15.6154	15.9549	15.7146	15.7698
Q6LYE1		0.0816113	0.0229088		0.195539	0.0148954		NYN domain-containing protein OS=Methanococcus maripaludis (strain S2 / LL) OX=267377 GN=MMP1050 PE=4 SV=1								11	11	11	64.2	64.2	64.2	24.384	0	45.989	985610000	22	18.2583	18.101	18.3968	18.1032	18.2082	18.4589	18.3411	18.1556	18.1076	18.1901	18.9728	18.8575	18.9772	18.9306	18.8829	18.9142	18.9005	18.9437	18.9536	18.9132
O74026		0.103738	0.0224543		0.481108	0.168129		Argininosuccinate lyase OS=Methanococcus maripaludis (strain S2 / LL) OX=267377 GN=argH PE=3 SV=2								9	9	9	21.6	21.6	21.6	54.051	0	44.442	411410000	14	17.8689	17.7043	17.7984	17.8012	17.827	17.9682	17.6363	17.7155	17.6604	17.8391	18.1308	18.5593	18.7127	18.3695	18.1837	18.6334	18.2304	18.0871	18.2927	18.3038
Q6LX56		0.0874534	0.0218865		0.179545	0.0640246		Phenylalanine--tRNA ligase alpha subunit OS=Methanococcus maripaludis (strain S2 / LL) OX=267377 GN=pheS PE=3 SV=1								9	9	9	19.2	19.2	19.2	58.086	0	30.819	560460000	13	17.6646	17.7739	17.5421	17.7186	17.7982	17.6627	17.6542	17.5927	17.4035	17.5793	17.7018	18.1139	18.1354	17.9987	17.8346	18.2091	17.9235	17.8672	17.6849	17.9654
Q6LWM3		0.0640713	0.0214965		0.457525	-0.168588		Probable tRNA pseudouridine synthase B OS=Methanococcus maripaludis (strain S2 / LL) OX=267377 GN=truB PE=3 SV=1								4	4	4	15.9	15.9	15.9	37.661	0	6.3149	107440000	5	16.1926	16.4437	16.5735	16.3735	16.4809	16.5828	16.1722	16.4607	16.2206	16.359	14.5259	14.5714	13.8725	14.3477	14.6137	14.3856	14.3792	14.6156	14.6095	14.367
Q6M0U4		0.0479373	0.0204401		0.387047	0.0682211		HD domain-containing protein OS=Methanococcus maripaludis (strain S2 / LL) OX=267377 GN=MMP0174 PE=4 SV=1								4	4	4	9.4	9.4	9.4	52.469	0	11.691	51530000	5	15.5017	15.4928	15.6258	15.1743	15.5631	15.9372	15.4334	15.5249	15.4849	15.6206	16.7691	16.6095	16.411	16.6373	16.4968	16.4943	16.5125	16.4603	16.5686	16.526
Q6M029		0.0701416	0.0188638		0.171159	-0.0859028		30S ribosomal protein S27ae OS=Methanococcus maripaludis (strain S2 / LL) OX=267377 GN=rps27ae PE=3 SV=1								1	1	1	11.9	11.9	11.9	7.5317	0.0040942	2.9619	366750000	2	15.0908	15.1556	15.0497	15.3366	15.0706	14.944	15.0887	14.8904	15.1486	15.0247	16.5975	16.3825	17.2314	16.9286	16.6483	17.065	16.9217	16.6633	16.7114	16.9509
Q6LYQ5		0.0479268	0.0176948		0.0728822	-0.0831219		Response regulatory domain-containing protein OS=Methanococcus maripaludis (strain S2 / LL) OX=267377 GN=cheY PE=1 SV=1								5	5	5	58.5	58.5	58.5	13.521	0	29.553	1438300000	12	19.2848	19.1544	19.0045	19.3229	19.0902	19.1598	19.366	19.0062	18.8361	19.1508	19.4708	17.8736	18.4399	19.1936	18.2645	18.4883	19.3081	18.5424	18.2703	18.7538
Q6M0D4		0.0751378	0.0158319		0.723843	0.0910535		Uncharacterized protein OS=Methanococcus maripaludis (strain S2 / LL) OX=267377 GN=MMP0337 PE=4 SV=1								4	4	4	25	25	25	17.241	0	20.326	413960000	7	17.9143	17.6736	17.7825	17.7696	17.7172	17.8659	17.6157	17.8975	17.78	17.7703	16.1597	16.2117	16.1122	16.0308	16.1387	15.8875	16.0928	16.1115	16.1596	15.9963
Q6M0A8		0.059137	0.0134932		0.0231057	-0.00407124		Methanol dehydrogenase regulatory protein related protein OS=Methanococcus maripaludis (strain S2 / LL) OX=267377 GN=MMP0363 PE=4 SV=1								5	5	5	21.4	21.4	21.4	35.486	0	16.607	316670000	10	17.2231	17.2754	17.3976	17.1485	17.1714	17.4731	17.3491	17.3356	17.2336	17.2809	17.6878	17.8221	17.8249	17.8073	17.8801	17.8696	17.7589	17.6496	17.7284	17.7125
Q6M176		0.0119015	0.011954		0.0860086	-0.0232598		Transcription initiation factor IIB OS=Methanococcus maripaludis (strain S2 / LL) OX=267377 GN=tfb PE=3 SV=1								11	11	11	35.4	35.4	35.4	38.205	0	51.73	3595800000	22	20.1769	20.3713	20.3061	19.8658	20.5498	21.2914	19.8111	20.1557	19.9631	20.3182	19.6733	19.5268	19.3119	19.6305	19.5593	19.377	19.6225	19.3784	19.5956	19.4808
Q6LXC7		0.0383456	0.0116202		0.421182	0.210641		tRNA (cytidine(56)-2-O)-methyltransferase OS=Methanococcus maripaludis (strain S2 / LL) OX=267377 GN=MMP1425 PE=3 SV=1								3	3	3	17.3	17.3	17.3	20.477	0	8.2751	104900000	4	15.3029	15.0497	15.4053	15.2518	15.405	15.1073	15.3926	15.1074	15.1819	15.2527	16.3379	17.3494	17.0204	16.6976	16.7314	16.9284	16.7527	16.6831	16.3582	16.7782
Q6LWJ8		0.064854	0.0107136		0.578268	-0.0779858		DNA polymerase sliding clamp OS=Methanococcus maripaludis (strain S2 / LL) OX=267377 GN=pcn PE=3 SV=1								16	16	16	73.6	73.6	73.6	27.87	0	75.102	4324700000	34	20.0605	19.9217	20.1722	20.0327	20.1002	20.126	20.0057	19.9818	19.9982	20.0593	20.2134	20.3989	20.2358	20.3633	20.4118	20.1959	20.4017	20.3548	20.4365	20.2866
P0C036		0.0275555	0.00807699		0.222178	0.0949063		Pyridoxal 5-phosphate synthase subunit PdxT OS=Methanococcus maripaludis (strain S2 / LL) OX=267377 GN=pdxT PE=3 SV=1								3	3	3	19.3	19.3	19.3	20.632	0	10.526	137060000	5	15.6826	15.5729	15.9151	15.6479	15.8081	15.8863	15.7574	15.6652	15.5278	15.8327	15.3244	15.8205	15.9405	15.5794	15.5823	15.9252	15.4874	15.3269	15.7002	15.6027
Q6LXN5		0.0214103	0.006821		2.28821	0.344124		Phosphoesterase, RecJ-like:RNA binding S1:OB-fold nucleic acid binding domain Related protein OS=Methanococcus maripaludis (strain S2 / LL) OX=267377 GN=MMP1314 PE=4 SV=1								16	16	16	24.4	24.4	24.4	85.438	0	69.252	1262500000	27	19.3081	19.3744	19.4123	19.4021	19.2931	19.1049	19.5318	19.5752	19.2417	19.3052	19.329	19.5883	19.5443	19.2738	19.2002	18.9645	19.1938	19.177	19.0491	19.193
Q6M0P3		0.0165698	0.00663535		0.687769	-0.139974		7-cyano-7-deazaguanine synthase OS=Methanococcus maripaludis (strain S2 / LL) OX=267377 GN=queC PE=3 SV=1								5	5	5	27	27	27	26.162	0	29.763	557440000	10	17.8256	17.8322	18.3831	18.0112	18.0573	17.9054	17.9295	17.9488	18.1898	18.077	17.6928	18.005	17.6666	17.9038	17.8461	17.8431	17.9602	17.8635	18.1518	17.8494
Q6LZM3		0.0238973	0.00643031		2.85806	-0.778172		Uncharacterized protein OS=Methanococcus maripaludis (strain S2 / LL) OX=267377 GN=MMP0601 PE=4 SV=1								8	8	8	33.6	33.6	33.6	33.397	0	28.556	1526700000	13	18.8252	18.714	18.6834	18.8605	18.7572	18.7126	18.5824	18.5624	18.9314	18.7465	15.5693	15.7511	16.163	16.5099	16.4474	16.6946	16.7185	16.4285	16.8371	16.3719
Q6M0Y6		0.0219523	0.00427977		0.376427	-0.0975491		Branched-chain-amino-acid aminotransferase OS=Methanococcus maripaludis (strain S2 / LL) OX=267377 GN=ilvE PE=3 SV=1								11	11	11	41.1	41.1	41.1	31.669	0	38.757	2685200000	21	20.8862	20.7929	20.8132	20.7516	20.9234	20.9893	20.7141	20.8111	20.7692	20.7843	20.0199	20.388	20.1762	20.2152	20.232	20.4377	20.1953	20.1501	20.5229	20.2043
Q6LX03		0.00596294	0.00128682		0.131927	0.0381362		Signal recognition particle 54 kDa protein OS=Methanococcus maripaludis (strain S2 / LL) OX=267377 GN=srp54 PE=3 SV=1								8	8	8	20.9	20.9	20.9	49.857	0	27.539	228680000	11	16.0719	16.2075	16.2256	16.1421	16.1728	16.3632	16.0698	16.1906	16.0639	16.1774	18.511	18.6526	18.8766	18.5932	18.5631	18.9078	18.5333	18.6926	18.5616	18.713
Q6M0V2		0.00165687	0.00107733		0.120323	-0.0642865		MatE family member (Drug/sodium antiporters) OS=Methanococcus maripaludis (strain S2 / LL) OX=267377 GN=MMP0166 PE=4 SV=1								3	3	3	7.4	7.4	7.4	49.485	0	9.7881	242250000	6	16.9706	16.9594	17.1799	16.5613	17.0507	16.9661	17.2817	17.5661	16.7875	16.8957	18.0273	17.6062	17.2055	17.6651	17.8497	17.2627	17.7434	17.7399	17.8028	17.4929
Q6LXF6		0.00158356	0.0009559		0.0911624	-0.0492385		Helix-hairpin-helix motif:DEAD/DEAH box helicase:Helicase, C-terminal:Helix-hairpin-helix DNA-binding, class 1:ERCC4 domain OS=Methanococcus maripaludis (strain S2 / LL) OX=267377 GN=MMP1395 PE=4 SV=1								3	3	3	4.9	4.9	4.9	85.743	0.0010799	3.879	382160000	4	17.6099	17.8755	17.7961	17.7578	17.7789	17.8559	17.2515	18.2647	17.6484	17.7477	16.8352	17.1564	17.1043	16.6939	17.3553	17.4937	16.8123	16.9641	17.168	16.952
Q6M072		0.00247829	0.00081857		0.0537465	-0.0403835		Protease HtpX homolog OS=Methanococcus maripaludis (strain S2 / LL) OX=267377 GN=htpX PE=3 SV=1								2	2	2	9.8	9.8	9.8	31.39	0	5.7804	74169000	3	16.084	16.0251	15.9395	15.9975	16.0329	16.3349	15.7857	16.0003	15.9411	16.0843	12.4281	13.4031	13.3507	13.5709	13.058	13.2189	13.0864	12.7607	12.9111	13.2823
Q6LYZ7		0.00176044	0.000721931		1.04051	0.271393		2Fe-2S ferredoxin-type domain-containing protein OS=Methanococcus maripaludis (strain S2 / LL) OX=267377 GN=MMP0832 PE=4 SV=1								6	6	6	10.8	10.8	10.8	64.602	0	15.408	317440000	10	17.951	17.7168	18.0539	17.7823	18.0854	18.2243	17.8634	17.7339	17.7499	17.9397	16.6121	16.1724	16.29	16.2527	16.1643	15.9075	16.2971	16.044	15.8552	16.1024
Q6LY48		0.000714334	-0.000295957		0.385812	-0.0843232		AAA_31 domain-containing protein OS=Methanococcus maripaludis (strain S2 / LL) OX=267377 GN=minD PE=4 SV=1								6	6	6	29	29	29	28.864	0	37.71	402230000	11	17.2967	17.5204	17.8421	17.5674	17.53	17.8137	17.3353	17.5703	17.5033	17.578	18.0413	17.8109	17.9189	18.0634	17.908	17.8337	18.2427	17.9492	18.0511	17.99
Q6LZR5		0.000379927	-0.000303904		0.64791	0.259433		DJ-1_PfpI domain-containing protein OS=Methanococcus maripaludis (strain S2 / LL) OX=267377 GN=MMP0559 PE=4 SV=1								7	7	6	44.8	44.8	40.7	18.404	0	40.725	1348300000	14	18.762	18.4959	18.5732	18.3183	18.6446	19.4366	18.1825	18.5808	18.501	18.6978	20.0007	20.0376	19.3596	19.4281	19.7629	19.2376	19.4275	19.8121	19.5709	19.5438
Q6LYI9		0.00144973	-0.000833829		0.444803	0.156406		Tryptophan synthase alpha chain OS=Methanococcus maripaludis (strain S2 / LL) OX=267377 GN=trpA PE=3 SV=1								7	7	7	45.3	45.3	45.3	28.496	0	32.621	387600000	9	17.3913	18.2357	17.7346	17.8741	18.02	17.8169	17.4803	17.7953	17.7415	17.7856	17.127	17.5258	17.1901	17.2353	17.4954	16.9472	16.9103	17.2071	16.9521	17.1122
Q6M043		0.00483628	-0.00208251		1.70282	0.303957		Oxidored_nitro domain-containing protein OS=Methanococcus maripaludis (strain S2 / LL) OX=267377 GN=MMP0428 PE=4 SV=1								6	6	6	25.4	25.4	25.4	40.949	0	34.265	491970000	12	17.2029	17.266	17.7259	17.1577	17.6023	17.5582	17.3324	17.3802	17.3712	17.4774	17.5984	17.4309	17.6961	17.2793	17.335	17.1983	17.4953	17.2663	17.0529	17.291
Q6M171		0.00980559	-0.00250022		0.757314	-0.347067		Uncharacterized protein OS=Methanococcus maripaludis (strain S2 / LL) OX=267377 GN=MMP0046 PE=1 SV=1								6	6	6	47.3	47.3	47.3	17.232	0	22.132	786030000	11	17.8814	17.9124	17.799	17.8306	18.0012	17.7226	17.921	17.6982	18.027	17.8943	17.1904	16.789	17.5418	17.2597	17.6075	17.8917	17.2175	17.3048	17.8436	17.421
Q6LYU3		0.00884167	-0.00353305		1.00266	0.214226		GMP synthase [glutamine-hydrolyzing] subunit B OS=Methanococcus maripaludis (strain S2 / LL) OX=267377 GN=guaAB PE=3 SV=1								17	17	17	61.9	61.9	61.9	34.856	0	58.168	2298100000	30	19.9578	19.8897	20.2306	19.8674	20.0697	20.383	20.0604	19.9281	19.8688	20.0746	20.1327	20.3285	20.63	20.0414	20.1363	20.316	20.1514	20.2036	20.0485	20.2192
Q6M009		0.00943386	-0.00421254		0.0148659	-0.00987689		Uncharacterized protein OS=Methanococcus maripaludis (strain S2 / LL) OX=267377 GN=MMP0464 PE=4 SV=1								2	2	2	8.7	8.7	8.7	29.182	0	4.8419	19658000	2	12.7086	12.9033	12.6625	12.6392	12.725	13.0224	12.3652	12.9052	12.9171	12.7864	13.8255	13.444	12.8671	13.2491	13.2572	13.1474	13.4172	13.4969	13.7647	13.0362
Q6LWL8		0.0122819	-0.00690746		0.0124308	0.00887203		Tungsten-containing formylmethanofuran dehydrogenase 2 subunit B OS=Methanococcus maripaludis (strain S2 / LL) OX=267377 GN=fwdB PE=3 SV=2								13	13	13	31.8	31.8	31.8	48.323	0	57.995	2642000000	27	19.9825	19.9575	19.9744	19.6771	20.4132	20.2987	19.9145	19.9354	19.6314	19.9888	19.3729	19.6189	19.6589	19.4768	19.5004	18.836	19.9933	19.7215	19.7203	19.5244
Q6M141		0.0403626	-0.00934219		0.313679	0.0748329		7-carboxy-7-deazaguanine synthase OS=Methanococcus maripaludis (strain S2 / LL) OX=267377 GN=queE PE=3 SV=1								6	6	5	24	24	23.1	27.919	0	8.2564	258830000	7	17.4545	17.3455	17.6172	17.4353	17.5563	17.625	17.3376	17.5167	17.4194	17.4749	17.8671	17.9065	17.8618	17.6445	17.8791	17.6413	17.7677	17.7945	18.0948	17.8288
Q6LYL1		0.0110312	-0.0105708		0.263182	0.182112		Acetyl-CoA decarbonylase/synthase complex subunit gamma OS=Methanococcus maripaludis (strain S2 / LL) OX=267377 GN=cdh PE=3 SV=1								19	19	19	49	49	49	50.305	0	128.5	13792000000	62	20.5189	20.8439	21.5779	20.7543	21.2927	21.609	20.425	21.0521	20.8117	21.0164	20.7447	21.8063	21.9379	21.551	21.0597	21.5075	21.46	21.332	20.9749	21.4038
Q6LZD5		0.0834744	-0.0155544		0.0204999	0.00638453		Beta-lactamase-like:KH domain OS=Methanococcus maripaludis (strain S2 / LL) OX=267377 GN=MMP0694 PE=4 SV=1								14	14	14	29.4	29.4	29.4	71.23	0	50.944	1200200000	23	19.2726	19.4146	19.3364	19.1893	19.4078	19.2838	19.44	19.4633	19.3562	19.3545	19.4903	19.1747	19.4333	19.4639	19.5094	19.4306	19.3641	19.1247	19.2656	19.3385
Q6LXJ1		0.0358296	-0.0162036		0.712022	-0.0878426		Uncharacterized protein OS=Methanococcus maripaludis (strain S2 / LL) OX=267377 GN=MMP1359 PE=4 SV=1								11	11	11	28.3	28.3	28.3	55.634	0	43.698	806090000	18	18.1681	18.0848	18.3817	18.0053	18.4466	18.6099	18.0478	18.0853	18.1716	18.2807	18.6085	18.3543	18.4073	18.5093	18.5425	18.483	18.5056	18.6265	18.6004	18.5311
Q6LYL0		0.0187054	-0.0175546		0.350437	0.235209		Acetyl-CoA decarbonylase/synthase complex subunit delta OS=Methanococcus maripaludis (strain S2 / LL) OX=267377 GN=cdhD PE=3 SV=1								23	23	23	59.1	59.1	59.1	43.037	0	113.35	15421000000	62	21.1578	21.4631	22.2651	21.4387	21.99	22.2001	21.1039	21.6444	21.5001	21.6408	21.161	22.1924	22.3931	21.911	21.3944	21.8778	21.8528	21.6992	21.3467	21.7749
Q6LYL2		0.0154227	-0.0178528		0.0670634	0.0513407		Conserved archaeal protein OS=Methanococcus maripaludis (strain S2 / LL) OX=267377 GN=MMP0979 PE=4 SV=1								4	4	4	20.1	20.1	20.1	17.173	0	13.724	1194500000	10	19.1777	19.414	20.3628	19.4993	19.9529	20.4964	18.9153	19.5238	19.6284	19.811	18.9174	20.0327	19.7113	19.7047	19.2369	19.2257	19.8254	19.7379	19.2842	19.6153
Q6LZL6		0.0517141	-0.0193049		1.09227	0.078323		BcrAD_BadFG domain-containing protein OS=Methanococcus maripaludis (strain S2 / LL) OX=267377 GN=MMP0608 PE=4 SV=1								12	12	12	35.8	35.8	35.8	43.942	0	58.61	1289000000	22	19.7286	19.559	19.8059	19.3786	19.7343	19.9728	19.7692	19.8433	19.6045	19.6867	19.3138	19.2421	19.2669	19.1552	19.2103	19.1178	19.2959	19.2017	19.1948	19.183
Q6LZJ1		0.0690293	-0.0198193		0.180568	0.0705493		Uncharacterized protein OS=Methanococcus maripaludis (strain S2 / LL) OX=267377 GN=MMP0636 PE=4 SV=1								7	7	7	27.3	27.3	27.3	46.035	0	32.716	408900000	12	17.6741	17.865	17.684	17.6128	17.6345	17.6892	17.71	17.9334	17.9853	17.7482	18.4574	17.7264	18.0516	17.9356	18.1338	17.8407	18.0578	18.1043	17.9755	17.9376
Q6M0E0		0.0850427	-0.0229114		1.91864	-0.444519		HIT domain-containing protein OS=Methanococcus maripaludis (strain S2 / LL) OX=267377 GN=MMP0331 PE=4 SV=1								6	6	6	58.5	58.5	58.5	15.24	0	24.588	668360000	11	17.8114	17.8927	17.9501	17.8615	18.062	18.1385	17.7409	17.8625	17.7805	17.7708	18.9405	19.2963	18.7541	19.5031	19.5964	19.4309	19.3831	19.2082	19.5271	19.3653
Q6M0L9		0.0390907	-0.023612		0.350383	-0.144917		Proteasome subunit alpha OS=Methanococcus maripaludis (strain S2 / LL) OX=267377 GN=psmA PE=1 SV=1								18	18	18	74.1	74.1	74.1	28.513	0	70.87	11529000000	53	21.3394	21.1357	21.5664	21.1504	21.4497	21.9959	21.1852	21.2685	21.175	21.357	20.1578	20.2986	20.2174	20.0382	20.5344	19.9825	20.3688	20.6207	20.6725	20.2957
Q6LX60		0.0788415	-0.0251516		2.28242	-0.157818		Orotate phosphoribosyltransferase OS=Methanococcus maripaludis (strain S2 / LL) OX=267377 GN=pyrE PE=3 SV=1								9	9	9	54.1	54.1	54.1	20.257	0	34.863	1122400000	17	17.6094	17.5939	17.7435	17.6291	17.6946	18.0315	17.4984	17.5865	17.6045	17.6769	18.5228	18.6346	18.5102	18.7935	18.7103	18.6723	18.7376	18.7164	18.6521	18.6242
Q6LY83		0.0641007	-0.025967		1.48441	0.231236		Magnesium transport protein CorA OS=Methanococcus maripaludis (strain S2 / LL) OX=267377 GN=corA PE=3 SV=1								1	1	1	2.2	2.2	2.2	37.194	0.0070352	2.632	26551000	3	13.2467	13.3482	13.3314	13.0084	13.2004	13.5498	13.3079	13.6697	13.272	13.305	15.8119	15.6409	15.728	15.4835	15.6623	15.3725	15.4263	15.6615	15.368	15.4363
Q6LYT5		0.0779267	-0.026782		0.981768	-0.229627		UPF0107 protein MMP0902 OS=Methanococcus maripaludis (strain S2 / LL) OX=267377 GN=MMP0902 PE=3 SV=1								6	6	6	76.2	76.2	76.2	13.75	0	36.581	701450000	8	17.2305	17.2549	17.0837	17.1867	17.1986	17.6055	17.1285	17.1501	17.0294	17.2579	16.6597	16.2448	16.684	16.8195	16.6091	16.7638	16.9627	16.6119	16.7878	16.7353
Q6LWL7		0.0497268	-0.0268822		0.065438	0.0429916		Polyferredoxin, associated with F420-non-reducing hydrogenase OS=Methanococcus maripaludis (strain S2 / LL) OX=267377 GN=vhuB PE=4 SV=1								6	6	6	13.1	13.1	13.1	41.095	0	11.842	465450000	7	19.2317	19.106	19.2516	19.006	19.4152	19.76	18.9926	19.2085	18.9576	19.1831	18.6806	18.9613	18.8614	18.4875	18.711	18.2511	19.0987	18.9303	19.2702	18.8321
Q6M0B4		0.0858354	-0.0280549		0.0674014	-0.0259616		UDP-N-acetylglucosamine 2-epimerase homolog OS=Methanococcus maripaludis (strain S2 / LL) OX=267377 GN=MMP0357 PE=1 SV=1								9	9	9	37.8	37.8	37.8	40.851	0	49.873	546640000	14	17.9528	17.9319	18.1726	17.8458	18.2049	18.2946	17.952	18.0971	17.8885	18.0529	16.8366	17.2148	17.2738	17.1827	17.1267	17.329	17.2382	16.8131	17.1163	17.0823
Q6LXS8		0.123417	-0.0288833		0.115851	-0.0468995		OMPdecase domain-containing protein OS=Methanococcus maripaludis (strain S2 / LL) OX=267377 GN=MMP1270 PE=4 SV=1								11	11	11	32.6	32.6	32.6	46.875	0	45.881	585430000	18	18.3183	18.3689	18.4607	18.4567	18.4958	18.6021	18.2357	18.4152	18.2637	18.3917	18.1472	18.6013	18.9098	18.6527	18.4827	18.6884	18.6027	18.6186	18.553	18.6059
Q6LY35		0.0594755	-0.030405		0.513469	-0.293214		Uncharacterized protein OS=Methanococcus maripaludis (strain S2 / LL) OX=267377 GN=MMP1158 PE=4 SV=1								6	6	6	60.2	60.2	60.2	9.6451	0	22.447	823930000	12	19.2921	18.9686	18.7342	18.6284	18.9531	18.9828	19.3012	19.0244	19.2822	19.0336	19.3474	18.762	18.3268	18.7732	19.2624	18.7033	19.102	19.4041	19.3867	19.0637
Q6LYB9		0.086248	-0.0315488		1.40639	-0.892493		Aminotransferase OS=Methanococcus maripaludis (strain S2 / LL) OX=267377 GN=MMP1072 PE=3 SV=1								7	7	7	19.2	19.2	19.2	41.78	0	14.011	658800000	8	18.1944	18.133	18.2641	18.1639	18.3612	18.6031	18.0037	18.1681	18.0722	18.2355	17.3818	15.7931	16.9201	17.9288	17.5242	17.2222	17.9274	17.4013	17.5409	17.5183
Q6LY25		0.340901	-0.0321515		0.323457	-0.0456025		ABC transporter domain-containing protein OS=Methanococcus maripaludis (strain S2 / LL) OX=267377 GN=MMP1168 PE=4 SV=1								13	13	13	36.7	36.7	36.7	27.745	0	40.304	2229300000	27	20.5034	20.5303	20.5312	20.4729	20.5763	20.5117	20.5586	20.67	20.5332	20.5612	20.3773	20.4022	20.404	20.3404	20.4591	20.5376	20.355	20.5773	20.3712	20.4102
Q6LYE8		0.107547	-0.0324891		0.338828	0.112834		V-type ATP synthase subunit F OS=Methanococcus maripaludis (strain S2 / LL) OX=267377 GN=atpF PE=3 SV=1								5	5	5	49.5	49.5	49.5	10.649	0	29.857	1172000000	11	18.0994	17.8562	18.0779	17.8765	18.1129	18.2534	17.8978	17.9164	18.2049	18.0866	19.6537	20.0569	20.3132	19.8294	19.9695	19.7335	19.8547	20.0696	19.9138	20.0312
Q6LXJ0		0.243792	-0.0356369		0.956998	-0.130473		DNA-directed RNA polymerase subunit B OS=Methanococcus maripaludis (strain S2 / LL) OX=267377 GN=rpoB2 PE=3 SV=1								19	19	19	49.1	49.1	49.1	55.882	0	82.26	3112300000	31	20.3448	20.223	20.3348	20.3359	20.3677	20.2338	20.3701	20.4733	20.2381	20.3128	20.1616	19.9196	20.1123	20.2188	20.1733	20.0365	20.2955	20.2438	20.202	20.172
P61710		0.179732	-0.0372426		0.484628	0.171445		Alanine--tRNA ligase OS=Methanococcus maripaludis (strain S2 / LL) OX=267377 GN=alaS PE=3 SV=1								26	26	25	37.6	37.6	36.8	101.4	0	160.11	2618600000	45	19.6204	19.7197	19.9327	19.9065	19.8903	19.726	19.8145	19.752	19.6796	19.7578	19.7498	20.3035	20.3253	20.1958	19.9419	19.9209	20.1284	19.7994	19.7422	20.0163
Q6LY13		0.0659853	-0.0381575		0.353379	-0.0811971		Uncharacterized protein OS=Methanococcus maripaludis (strain S2 / LL) OX=267377 GN=MMP1180 PE=4 SV=1								2	2	2	4.3	4.3	4.3	65.388	0.0041068	3.0207	54605000	2	15.4842	15.5565	15.7369	15.3802	15.7645	15.5051	15.9271	16.04	15.1673	15.5866	15.4395	15.5688	15.5599	15.5873	15.6891	15.6882	15.5812	15.7689	15.309	15.4665
Q6LX65		0.0836007	-0.040136		0.384914	0.0527242		Lactaldehyde dehydrogenase OS=Methanococcus maripaludis (strain S2 / LL) OX=267377 GN=MMP1487 PE=3 SV=1								8	8	8	24.1	24.1	24.1	50.98	0	45.888	268760000	13	16.9361	17.0522	17.1211	16.9823	17.1776	17.5298	16.6488	17.0912	17.0298	17.1381	17.9965	18.0097	17.8729	17.805	17.8404	17.8546	17.9569	18.0431	17.9418	17.9251
Q6M0Q7		0.136152	-0.0416555		0.531734	-0.118729		Glycine--tRNA ligase OS=Methanococcus maripaludis (strain S2 / LL) OX=267377 GN=glyS PE=3 SV=1								14	14	14	28.9	28.9	28.9	66.01	0	52.971	1275800000	25	18.8517	18.8454	19.1485	18.8916	19.1755	19.2166	18.9147	18.8822	18.8604	19.0092	19.5173	19.324	19.5489	19.4339	19.5669	19.692	19.472	19.4851	19.8427	19.55
Q6LY71		0.104638	-0.0426043		0.994173	0.244097		ATP-binding protein, ATPase-like:Histidine kinase, HAMP region:Histidine kinase A, N-terminal:Bacterial sensor protein C-term OS=Methanococcus maripaludis (strain S2 / LL) OX=267377 GN=MMP1120 PE=4 SV=1								4	4	4	9.8	9.8	9.8	68.393	0	22.308	245750000	7	14.8354	15.3625	14.9513	15.1979	15.027	15.1323	14.8084	15.3476	15.0407	15.1022	17.086	17.6366	17.5964	17.3349	17.214	17.2051	17.22	17.1607	17.0389	17.2277
Q6LZJ2		0.148824	-0.0440588		0.234182	0.0620445		ABC transporter domain-containing protein OS=Methanococcus maripaludis (strain S2 / LL) OX=267377 GN=MMP0635 PE=4 SV=1								5	5	4	24.5	24.5	21.6	26.793	0	11.662	83472000	7	15.7596	15.616	15.7795	15.7344	15.6133	16.0557	15.7475	15.5527	15.8711	15.7451	15.5539	15.6778	15.9635	15.7465	15.5716	15.8027	15.7171	15.7054	15.4749	15.5606
Q6LWI9		0.0639859	-0.0447246		0.183179	-0.140854		Conserved hypothetical archaeal protein OS=Methanococcus maripaludis (strain S2 / LL) OX=267377 GN=MMP1720 PE=4 SV=1								4	4	4	9.2	9.2	9.2	68.184	0	14.302	66559000	5	12.255	12.0841	12.9408	12.3145	12.4877	12.7899	11.9465	12.6649	12.6247	12.4874	17.0626	16.5192	16.8884	16.4343	16.8196	16.7532	16.6795	17.6408	17.4582	16.9973
Q6M0B3		0.0870912	-0.0447919		0.749197	0.114339		Conserved hypothetical archaeal protein OS=Methanococcus maripaludis (strain S2 / LL) OX=267377 GN=MMP0358 PE=4 SV=1								5	5	5	18.5	18.5	18.5	43.391	0	21.887	235160000	9	16.6872	16.1964	16.6656	16.6587	16.9401	16.7086	16.5003	16.2422	16.3172	16.5543	17.5162	17.7028	17.8365	17.5382	17.613	17.6018	17.6818	17.5297	17.4606	17.6197
Q6M081		0.139892	-0.0451852		0.517944	-0.14064		Probable inosine/xanthosine triphosphatase OS=Methanococcus maripaludis (strain S2 / LL) OX=267377 GN=MMP0390 PE=3 SV=1								2	2	2	8.2	8.2	8.2	24.074	0	4.4514	95389000	3	14.1185	13.9397	14.2709	13.923	14.1673	14.4028	14.277	14.1688	13.9905	14.0139	14.9065	14.988	15.1718	14.956	15.1441	15.4333	15.1575	15.3305	14.9551	15.279
Q6LYZ3		0.277726	-0.0455783		0.443299	0.115788		2-hydroxyglutaryl-CoA dehydratase (Component D) related protein OS=Methanococcus maripaludis (strain S2 / LL) OX=267377 GN=MMP0836 PE=4 SV=1								12	12	12	27.5	27.5	27.5	45.101	0	33.503	2827900000	23	19.321	19.2981	19.5566	19.5331	19.4189	19.4193	19.369	19.3705	19.5141	19.4188	19.7172	20.0189	19.9625	19.9475	19.6984	19.943	19.9146	19.5962	19.6029	19.7795
Q6LYE5		0.206373	-0.0458721		0.384239	-0.0877298		V-type ATP synthase subunit D OS=Methanococcus maripaludis (strain S2 / LL) OX=267377 GN=atpD PE=3 SV=1								12	12	12	58.9	58.9	58.9	24.394	0	43.253	2194500000	24	19.8788	19.6099	19.9191	19.7842	19.9445	19.9342	19.9462	19.7212	19.7606	19.7865	19.5897	19.8476	20.0995	19.8931	19.8931	19.9603	19.882	19.9918	19.9797	19.9146
Q6LXI5		0.319791	-0.0469879		0.741094	-0.145007		Probable transcription termination protein NusA OS=Methanococcus maripaludis (strain S2 / LL) OX=267377 GN=nusA PE=3 SV=1								15	15	15	65.9	65.9	65.9	19.404	0	59.594	3826700000	29	20.8728	20.8335	20.7499	20.9769	20.78	20.7249	20.9339	20.8575	20.9215	20.8121	19.9817	19.8698	20.231	20.3211	20.0585	20.2151	20.2792	20.0705	20.0906	20.1133
Q6LWK6		0.128667	-0.0473595		0.138132	0.0351267		Conserved hypothetical archaeal protein OS=Methanococcus maripaludis (strain S2 / LL) OX=267377 GN=MMP1703 PE=4 SV=1								2	2	2	8.7	8.7	8.7	34.216	0	9.7932	67729000	3	15.4469	15.1014	15.53	15.6215	15.301	15.3489	15.1309	15.4659	15.5726	15.3497	14.7471	14.9655	14.8208	14.5949	14.8667	14.7961	14.7358	15.0363	14.8261	14.9031
Q6M0G2		0.0900898	-0.047533		0.819975	-0.413366		DrsE domain-containing protein OS=Methanococcus maripaludis (strain S2 / LL) OX=267377 GN=MMP0309 PE=4 SV=1								4	4	4	40.4	40.4	40.4	12.253	0	9.0397	224820000	5	17.4671	16.5961	16.7871	16.9469	16.8778	17.262	17.0594	16.9089	16.9307	16.9381	13.6363	13.5476	13.8687	13.4401	14.1179	14.1549	13.8355	14.4534	14.5836	14.1919
Q6M044		0.125827	-0.0489817		0.383517	0.0473022		Replication factor C small subunit OS=Methanococcus maripaludis (strain S2 / LL) OX=267377 GN=rfcS PE=3 SV=1								18	18	18	58.4	58.4	58.4	35.643	0	82.504	2943700000	35	19.7804	19.7741	20.0587	19.7402	19.9884	20.3143	19.6979	19.8375	19.942	19.9841	19.6903	19.4818	19.5498	19.4967	19.5534	19.4476	19.6022	19.5812	19.4788	19.4943
Q6LXL3		0.236588	-0.0515022		0.294309	-0.108804		Hydrogenase maturation protease, related OS=Methanococcus maripaludis (strain S2 / LL) OX=267377 GN=MMP1337 PE=4 SV=1								5	5	5	36.2	36.2	36.2	17.711	0	12.7	562360000	8	18.4468	18.8086	18.5447	18.7354	18.7257	18.5311	18.6886	18.6816	18.5469	18.607	17.2382	17.6026	17.5309	17.7248	17.4824	17.8909	17.6548	17.3016	17.3418	17.4503
Q6LZQ2		0.358838	-0.0518007		0.0566713	-0.0173232		Peptidyl-prolyl cis-trans isomerase OS=Methanococcus maripaludis (strain S2 / LL) OX=267377 GN=slyD PE=3 SV=1								17	17	17	80.3	80.3	80.3	25.536	0	145.36	24942000000	64	21.708	21.7922	21.8681	21.8573	21.9021	21.8079	21.9835	21.7547	21.742	21.8158	21.6207	22.0086	22.049	21.9601	21.9146	22.0759	21.7974	21.809	21.9034	21.8919
Q6LX79		0.30309	-0.0533905		0.102154	0.174222		Uncharacterized protein OS=Methanococcus maripaludis (strain S2 / LL) OX=267377 GN=MMP1473 PE=4 SV=1								4	4	4	36.5	36.5	36.5	14.511	0	18.737	344390000	8	16.5209	16.5125	16.726	16.6996	16.6973	16.5436	16.7801	16.5572	16.5613	16.6632	15.9826	18.0579	16.5084	16.2813	17.0461	16.2344	16.0583	18.1625	16.2699	17.0111
Q6LXS4		0.132441	-0.0542555		0.291325	0.159831		Acetyl-CoA synthetase, AMP-forming-related OS=Methanococcus maripaludis (strain S2 / LL) OX=267377 GN=MMP1274 PE=4 SV=1								6	6	6	18	18	18	63.362	0	25.017	657250000	9	16.8564	16.8515	17.0466	16.7223	17.1248	16.9573	17.2554	17.1448	16.63	16.9852	17.7117	18.1246	18.6863	18.2482	17.9422	18.2556	18.1333	17.7582	17.7486	18.0457
Q6LXS6		0.278261	-0.0554978		0.0466905	0.0172138		2-oxoisovalerate oxidoreductase subunit beta OS=Methanococcus maripaludis (strain S2 / LL) OX=267377 GN=vorB PE=4 SV=1								8	8	8	23.1	23.1	23.1	38.44	0	39.591	351030000	10	17.761	17.7613	17.8774	17.9933	18.0077	17.9184	17.7331	17.7237	17.7564	17.7615	16.9075	17.2018	17.5117	17.2495	17.2306	17.242	17.2955	17.0547	17.0666	17.2214
Q6LWM8		0.337754	-0.055637		0.725724	-0.141929		PAPS_reduct domain-containing protein OS=Methanococcus maripaludis (strain S2 / LL) OX=267377 GN=MMP1681 PE=4 SV=1								7	7	7	21	21	21	50.763	0	14.827	281100000	12	17.8647	17.9561	17.7311	18.0364	17.8951	17.942	17.8271	17.7745	17.9624	17.9403	17.2843	17.2528	17.4254	17.4099	17.4649	17.7216	17.3406	17.303	17.5366	17.4624
Q6LXY6		0.206718	-0.0571648		0.0196171	-0.00742499		Translation initiation factor 2 subunit gamma OS=Methanococcus maripaludis (strain S2 / LL) OX=267377 GN=eif2g PE=3 SV=1								15	15	15	53.7	53.7	53.7	43.942	0	93.086	4179600000	29	20.343	20.515	20.6956	20.4476	20.6888	20.8138	20.5403	20.5222	20.4373	20.5087	20.572	20.2518	20.472	20.6031	20.2778	20.2494	20.7325	20.376	20.3974	20.4244
Q6LX22		0.109571	-0.0573117		0.0655203	-0.0150042		Uncharacterized protein OS=Methanococcus maripaludis (strain S2 / LL) OX=267377 GN=MMP1531 PE=4 SV=1								6	6	6	20.7	20.7	20.7	35.503	0	20.615	232360000	7	17.3082	17.2692	17.2515	17.4533	17.1476	16.8265	17.7122	17.6051	17.2572	17.3095	17.0114	16.8261	17.0817	17.129	16.8648	17.039	17.0797	16.895	16.921	17.0775
Q6LWS1		0.187818	-0.0574249		0.0154621	-0.0109523		Glutaredoxin domain-containing protein OS=Methanococcus maripaludis (strain S2 / LL) OX=267377 GN=MMP1635 PE=4 SV=1								3	3	3	30	30	30	8.6332	0	6.9015	125930000	4	16.675	16.6967	16.5778	16.3982	16.6072	16.7431	16.6929	16.9847	16.8175	16.7026	16.3419	16.5951	17.1966	16.1967	16.7076	17.0186	16.6394	16.8435	16.9271	16.7927
Q6M0J1		0.145407	-0.0576642		0.288716	-0.10397		Beta-ribofuranosylaminobenzene 5-phosphate synthase OS=Methanococcus maripaludis (strain S2 / LL) OX=267377 GN=mptG PE=3 SV=1								5	5	5	18.5	18.5	18.5	35.348	0	16.995	135170000	9	16.8417	16.5657	16.8675	16.7273	16.8744	17.2363	16.6727	16.5741	16.8109	16.8345	16.6003	16.9167	16.6352	16.5516	16.9218	16.6831	16.7066	17.2005	16.8648	16.8469
Q6LZM2		0.476875	-0.0590998		0.160113	0.0363661		Orotidine 5-phosphate decarboxylase OS=Methanococcus maripaludis (strain S2 / LL) OX=267377 GN=pyrF PE=3 SV=1								5	5	5	32.3	32.3	32.3	23.639	0	16.806	247790000	7	16.769	16.6957	16.8975	16.8579	16.8597	16.8165	16.9683	16.8171	16.7596	16.8706	15.7864	16.1424	16.028	16.0971	15.9018	16.0081	15.8712	15.8573	15.9601	16.0404
Q6LXP6		0.115256	-0.0599778		3.8879	-0.539716		Sensory transduction histidine kinase OS=Methanococcus maripaludis (strain S2 / LL) OX=267377 GN=MMP1303 PE=4 SV=1								18	18	18	33.8	33.8	33.8	70.803	0	87.365	1627100000	29	18.8599	18.9314	19.0862	18.7346	18.7265	19.1217	18.7783	19.2984	19.4554	19.046	19.1543	19.2381	19.2989	19.6785	19.7834	19.611	19.8906	19.7769	19.8805	19.6623
Q6M0W3		0.144999	-0.0618362		1.75079	-0.384947		CRM domain-containing protein OS=Methanococcus maripaludis (strain S2 / LL) OX=267377 GN=MMP0155 PE=4 SV=1								4	4	4	39.4	39.4	39.4	14.635	0	20.122	414170000	6	18.4228	18.3478	18.1577	18.266	18.4106	18.0286	18.4952	18.7875	18.2396	18.3632	16.7277	16.3567	16.6256	17.0238	16.7537	16.945	17.0157	16.7807	17.2109	16.7795
Q6M174		0.226986	-0.0620656		0.646253	0.141098		Isopentenyl-diphosphate delta-isomerase OS=Methanococcus maripaludis (strain S2 / LL) OX=267377 GN=fni PE=3 SV=1								3	3	3	7.6	7.6	7.6	38.74	0	9.5074	156310000	6	16.0082	15.8655	15.9569	15.8089	15.9107	16.0944	15.8272	16.2233	16.1691	15.9243	16.4136	16.5148	16.1787	16.075	16.3581	16.2547	16.0309	16.3264	16.3225	16.2386
Q6LY62		0.182538	-0.0628544		0.463947	-0.144525		PPIase cyclophilin-type domain-containing protein OS=Methanococcus maripaludis (strain S2 / LL) OX=267377 GN=ppiB PE=4 SV=1								8	8	8	47.5	47.5	47.5	17.974	0	36.115	3026100000	19	20.0667	19.8007	19.9987	19.9126	20.0387	19.7188	20.344	19.9776	20.1175	20.0632	20.1596	19.7654	20.3426	20.401	20.1844	20.1865	20.4325	20.0773	20.1205	20.19
Q6LYW7		0.208504	-0.0651239		0.0480888	-0.0390498		ABC transporter domain-containing protein OS=Methanococcus maripaludis (strain S2 / LL) OX=267377 GN=proV PE=4 SV=1								2	2	2	9.8	9.8	9.8	44.151	0	20.793	131400000	4	15.4689	15.5791	15.5233	15.4164	15.8953	15.7251	15.5144	15.643	15.3391	15.6661	13.6625	12.6594	13.1003	13.1486	13.1436	13.1541	13.7125	13.3172	12.603	13.1459
Q6M0G3		0.223012	-0.0655963		0.689745	0.196596		UPF0033 domain-containing protein OS=Methanococcus maripaludis (strain S2 / LL) OX=267377 GN=MMP0308 PE=4 SV=1								5	5	5	67.1	67.1	67.1	7.6537	0	63.233	6758900000	16	18.824	18.988	18.923	18.8987	18.9918	19.3441	18.7838	18.9255	18.9198	18.952	18.6393	18.7214	18.4466	18.381	18.6835	18.0302	18.4053	18.5379	18.3972	18.4187
Q6LXI9		1.00943	-0.0658887		0.966777	-0.216377		DNA-directed RNA polymerase subunit beta OS=Methanococcus maripaludis (strain S2 / LL) OX=267377 GN=rpoB1 PE=3 SV=1								19	19	19	40.6	40.6	40.6	68.571	0	127.61	3937000000	35	20.6806	20.5625	20.713	20.6757	20.7398	20.7265	20.7293	20.6893	20.7469	20.692	20.7726	20.2461	20.5282	20.732	20.6429	20.59	20.7946	20.8796	20.7529	20.6546
Q6LYR1		0.204701	-0.0672671		0.281789	0.144757		Chemotaxis protein CheA OS=Methanococcus maripaludis (strain S2 / LL) OX=267377 GN=cheA PE=4 SV=1								18	18	18	21.8	21.8	21.8	102.38	0	85.72	1016600000	29	18.977	19.0524	18.8651	19.0482	18.9996	18.9908	19.228	19.2567	18.6692	18.9962	20.0805	19.2789	19.3618	19.6428	19.2915	19.1072	19.7203	19.4575	19.3544	19.5254
Q6LXA8		0.29421	-0.0687604		1.10664	-0.260866		Methionine aminopeptidase OS=Methanococcus maripaludis (strain S2 / LL) OX=267377 GN=map PE=3 SV=1								5	5	5	23.7	23.7	23.7	32.597	0	18.881	354410000	8	16.0362	16.1086	15.7898	16.1302	15.9451	15.8897	16.234	16.0022	16.0807	16.0397	17.2804	17.2059	17.5596	17.7715	17.5157	17.8272	17.6375	17.3471	17.558	17.4085
Q6LXN6		0.33573	-0.069231		0.0514034	0.0140319		Flap endonuclease 1 OS=Methanococcus maripaludis (strain S2 / LL) OX=267377 GN=fen-1 PE=3 SV=1								3	3	3	9.3	9.3	9.3	36.806	0	7.8004	69626000	5	15.1641	15.071	15.0218	15.1933	15.0627	14.9099	15.2635	15.2629	15.2368	15.2603	14.9583	15.0565	15.0239	14.7564	15.0724	15.2052	14.9479	15.0942	14.9172	14.9003
Q6M0Z8		0.154225	-0.0711457		0.181815	-0.0529512		OB domain-containing protein OS=Methanococcus maripaludis (strain S2 / LL) OX=267377 GN=MMP0120 PE=4 SV=1								2	2	2	22.7	22.7	22.7	14.623	0	6.6855	78241000	3	16.5152	16.6526	16.3799	16.4848	16.4908	16.376	17.0186	16.8544	16.2975	16.4731	13.8092	13.6381	13.4031	13.6508	13.6076	13.431	13.8356	13.7498	13.7435	13.6861
Q6LZD4		0.250588	-0.0711915		0.00453976	-0.00165526		Proteasome subunit beta OS=Methanococcus maripaludis (strain S2 / LL) OX=267377 GN=psmB PE=1 SV=1								10	10	10	50.7	50.7	50.7	23.648	0	47.283	5030800000	23	20.5809	20.42	20.5225	20.4145	20.5409	20.9436	20.4715	20.5926	20.5108	20.5232	19.6138	19.6134	19.7238	19.6766	19.6405	19.3844	19.9266	19.8066	19.4773	19.6695
Q6M0D0		0.497625	-0.0727638		1.18643	0.268514		Pyruvate carboxylase subunit A OS=Methanococcus maripaludis (strain S2 / LL) OX=267377 GN=pycA PE=4 SV=1								15	15	15	39.5	39.5	39.5	55.612	0	113.49	1475800000	28	18.6185	18.5516	18.7236	18.6935	18.7479	18.6134	18.8415	18.7553	18.5724	18.6686	19.0366	19.525	19.5701	19.1453	19.1227	19.2509	19.0671	19.0595	19.0069	19.184
Q6LXE5		0.325125	-0.0732485		0.236215	-0.0622149		Protein translation factor SUI1 homolog OS=Methanococcus maripaludis (strain S2 / LL) OX=267377 GN=MMP1406 PE=3 SV=1								4	4	4	38.2	38.2	38.2	11.504	0	15.126	632640000	7	17.8427	17.9397	18.2652	18.1751	18.1358	18.156	18.0338	17.9662	18.0677	18.037	17.4906	17.2636	17.3807	17.5787	17.4127	17.4694	17.595	17.1389	17.4485	17.44
Q6LYH5		0.427746	-0.0746746		0.0214747	0.0056893		Uncharacterized protein OS=Methanococcus maripaludis (strain S2 / LL) OX=267377 GN=MMP1016 PE=4 SV=1								28	28	28	62.2	62.2	62.2	47.004	0	152.89	9315800000	70	21.3902	21.2629	21.179	21.238	21.2654	21.2454	21.4532	21.4405	21.4697	21.3384	21.6579	21.7219	21.4145	21.4592	21.4881	21.7595	21.5832	21.5947	21.6698	21.6084
Q6M0P5		0.223094	-0.0753876		0.792377	-0.164156		Glutamate-1-semialdehyde 2,1-aminomutase OS=Methanococcus maripaludis (strain S2 / LL) OX=267377 GN=hemL PE=3 SV=1								11	11	11	31.4	31.4	31.4	47.426	0	59.835	848500000	19	18.7009	18.5527	18.7494	18.6971	18.882	19.1185	18.5356	18.5919	18.6331	18.6986	17.792	17.8773	18.0573	18.0304	17.8441	18.1972	18.1009	17.992	18.2734	18.0274
Q6M164		0.236746	-0.0768731		0.0190575	-0.00630347		Uncharacterized protein OS=Methanococcus maripaludis (strain S2 / LL) OX=267377 GN=MMP0053 PE=4 SV=1								1	1	1	5.3	5.3	5.3	27.595	0	4.366	102120000	2	14.7567	14.58	14.5666	14.9257	14.8664	14.555	14.3857	14.6773	14.8576	14.7578	15.204	15.3704	15.2346	15.0894	15.0565	15.2417	15.3492	15.4034	15.5153	15.1806
Q6M0L2		0.167676	-0.0774873		0.220872	0.0815748		50S ribosomal protein L12 OS=Methanococcus maripaludis (strain S2 / LL) OX=267377 GN=P1 PE=3 SV=1								8	8	8	98	98	98	9.745	0	71.045	18527000000	70	21.9799	22.0122	21.557	21.728	21.9457	21.6035	22.1761	21.8488	22.2611	21.9749	22.5785	22.5284	23.1961	22.7247	22.6701	22.6719	22.5613	22.672	22.8166	22.767
Q6M0A2		0.168945	-0.0797294		0.0872369	-0.0165316		Uncharacterized protein OS=Methanococcus maripaludis (strain S2 / LL) OX=267377 GN=MMP0369 PE=4 SV=1								13	13	13	30.6	30.6	30.6	68.61	0	88.215	3280100000	31	19.4385	19.6149	20.1236	20.0155	19.8938	20.0571	19.5984	19.5915	19.6762	19.7882	19.3895	19.2928	19.452	19.4458	19.5571	19.2881	19.429	19.2879	19.3597	19.3051
Q6M177		0.0910914	-0.0813592		0.506965	0.050148		T2SP_E domain-containing protein OS=Methanococcus maripaludis (strain S2 / LL) OX=267377 GN=MMP0040 PE=4 SV=1								20	20	20	42.4	42.4	42.4	61.779	0	121.13	2464400000	38	19.2739	19.3321	19.5964	19.0713	19.7374	20.4528	19.0811	19.3687	19.1816	19.5278	19.3074	19.3476	19.2341	19.1536	19.2505	19.1984	19.2352	19.2966	19.343	19.2348
Q6M192		0.121861	-0.0823104		0.20012	-0.119507		Uncharacterized protein OS=Methanococcus maripaludis (strain S2 / LL) OX=267377 GN=MMP0025 PE=4 SV=1								10	10	10	95.6	95.6	95.6	9.8751	0	42.338	3608800000	26	20.334	20.3752	20.0439	20.8032	20.1091	19.6399	20.4558	20.4013	20.5908	20.3813	19.9191	20.2024	20.0893	20.5806	19.8565	20.5686	20.3009	19.6145	20.2177	20.1247
Q6M0Q5		0.233848	-0.0838073		0.34405	0.100384		dITP/XTP pyrophosphatase OS=Methanococcus maripaludis (strain S2 / LL) OX=267377 GN=MMP0214 PE=3 SV=1								8	8	8	40.4	40.4	40.4	20.951	0	19.322	352950000	11	17.1894	17.1989	17.4198	17.2388	17.2584	17.7619	17.0924	17.4339	17.3336	17.3756	16.605	16.9674	17.0348	16.6697	16.9463	16.8569	16.58	16.9051	16.654	16.7774
P62445		0.324643	-0.08765		0.136694	-0.0553513		50S ribosomal protein L11 OS=Methanococcus maripaludis (strain S2 / LL) OX=267377 GN=rpl11 PE=3 SV=1								12	12	12	72.3	72.3	72.3	16.872	0	60.009	7259600000	30	20.2426	20.2072	19.9892	20.203	20.3395	19.9992	20.5	20.2369	20.1251	20.1637	20.4628	20.3236	21.0411	20.6508	20.6045	20.8386	20.6478	20.5735	20.672	20.638
Q6LXF4		0.406055	-0.0876983		1.02027	0.120255		Chromosome partition protein Smc OS=Methanococcus maripaludis (strain S2 / LL) OX=267377 GN=smc1 PE=3 SV=1								20	20	20	19.1	19.1	19.1	137.18	0	49.54	1154600000	27	19.1703	19.1652	19.248	19.1792	19.3489	19.5578	19.1663	19.3025	19.1386	19.2559	18.46	18.2144	18.2751	18.2618	18.2258	18.1259	18.2173	18.2447	18.1018	18.1885
Q6LZE2		0.22684	-0.0881742		1.12785	-0.248496		Triosephosphate isomerase OS=Methanococcus maripaludis (strain S2 / LL) OX=267377 GN=tpiA PE=3 SV=1								5	5	5	49.1	49.1	49.1	18.11	0	18.15	2347600000	13	18.8631	18.646	18.7397	18.472	18.8438	19.2439	18.7241	18.8014	18.9413	18.8321	19.215	18.8551	18.7923	19.2372	19.0792	19.2922	19.2904	19.3272	18.9896	19.1805
Q6M0I1		0.35939	-0.0907803		1.46658	0.459805		Hydrogenase expression/formation protein OS=Methanococcus maripaludis (strain S2 / LL) OX=267377 GN=hypD PE=4 SV=1								10	10	10	24.2	24.2	24.2	39.979	0	26.376	1008500000	16	19.2769	19.2179	19.2799	19.277	19.3732	19.5716	19.339	19.4886	19.0447	19.2653	18.5724	18.9026	18.725	18.5739	18.601	18.3489	18.105	17.9907	18.0218	18.1734
Q6LYB4		0.585772	-0.0914567		2.05042	-0.403111		Phosphoglucosamine mutase OS=Methanococcus maripaludis (strain S2 / LL) OX=267377 GN=glmM PE=1 SV=1								4	4	4	11	11	11	49.383	0	9.3642	204560000	5	16.7398	16.5663	16.8862	16.7676	16.781	16.9304	16.7456	16.8874	16.8211	16.837	14.2455	14.5641	14.7225	14.924	15.0848	14.8748	14.9851	14.7985	14.8156	14.849
Q6M1B3		0.495278	-0.0916993		0.135598	-0.0566486		2-oxoglutarate oxidoreductase alpha subunit OS=Methanococcus maripaludis (strain S2 / LL) OX=267377 GN=korA PE=4 SV=1								9	9	9	33.3	33.3	33.3	40.113	0	57.082	811760000	18	18.78	18.8172	18.9804	18.9231	19.063	19.1476	18.8862	18.8552	18.8304	18.9245	18.288	18.4601	18.4764	18.3059	18.1957	18.4349	18.9228	18.3577	18.5718	18.4718
Q6LZT3		0.242019	-0.095034		2.15916	-0.239014		Phosphoribosylaminoimidazole-succinocarboxamide synthase OS=Methanococcus maripaludis (strain S2 / LL) OX=267377 GN=purC PE=3 SV=1								13	13	13	56.5	56.5	56.5	27.763	0	53.494	3129100000	26	20.3466	20.3776	20.6401	20.3646	20.7039	20.9333	20.6072	20.4372	20.2526	20.5422	20.3921	20.3055	20.4557	20.6198	20.5805	20.7134	20.664	20.4598	20.7031	20.563
Q6M0N8		0.530318	-0.0952776		0.27605	-0.254087		Conserved Hypthetical Protein OS=Methanococcus maripaludis (strain S2 / LL) OX=267377 GN=MMP0232 PE=4 SV=1								2	2	2	9	9	9	38.669	0	14.948	59422000	2	13.4827	13.8693	13.6657	13.7571	13.7482	13.73	13.7259	13.9084	13.7374	13.7378	12.2283	12.577	13.4215	13.6689	12.8091	13.5195	12.6645	12.3308	12.9852	12.8507
Q6M080		0.67739	-0.0968685		0.814498	-0.181927		Aminotran_5 domain-containing protein OS=Methanococcus maripaludis (strain S2 / LL) OX=267377 GN=aspC PE=4 SV=1								23	23	23	66.5	66.5	66.5	41.85	0	99.447	4735100000	46	20.3432	20.1832	20.376	20.3607	20.5491	20.3826	20.4707	20.2727	20.3502	20.2997	20.3058	20.3447	20.5371	20.6998	20.5623	20.8055	20.6369	20.3491	20.4129	20.4683
Q6LXV5		0.319986	-0.0973835		0.032549	0.0094347		Uncharacterized protein OS=Methanococcus maripaludis (strain S2 / LL) OX=267377 GN=MMP1241 PE=4 SV=1								3	3	3	26.1	26.1	26.1	13.633	0	8.735	127240000	6	14.0667	13.9011	14.1529	13.9613	14.1373	14.279	13.8595	14.4102	14.1784	14.1491	16.4624	16.7453	16.6969	16.4125	16.7295	16.7427	16.5659	16.7527	16.5493	16.5237
Q6LXI2		1.02366	-0.0987453		0.220799	0.0387955		Elongation factor 2 OS=Methanococcus maripaludis (strain S2 / LL) OX=267377 GN=fusA PE=3 SV=1								34	34	34	48.8	48.8	48.8	80.133	0	206.01	18924000000	103	22.11	22.1953	22.0978	22.2453	22.2946	22.1507	22.3452	22.2157	22.1473	22.1718	22.2699	22.4226	22.5643	22.4762	22.3388	22.4477	22.3888	22.3531	22.2763	22.376
Q6LYI4		0.140156	-0.0997477		0.130018	-0.0452606		Anthranilate phosphoribosyltransferase OS=Methanococcus maripaludis (strain S2 / LL) OX=267377 GN=trpD PE=3 SV=1								7	7	7	19.9	19.9	19.9	34.87	0	18.478	295090000	10	17.395	18.4127	17.8554	17.9259	18.1081	17.6159	18.5545	17.8276	17.8925	17.8661	15.9651	16.2819	15.9525	16.4658	16.0549	16.1614	15.9761	16.0348	15.9777	16.0363
Q6LXM8		0.790566	-0.0997817		0.23125	-0.0421718		RPOLD domain-containing protein OS=Methanococcus maripaludis (strain S2 / LL) OX=267377 GN=rpoD PE=4 SV=1								8	8	8	55	55	55	20.138	0	38.504	1807000000	18	18.5144	18.536	18.7637	18.6971	18.7291	18.752	18.6469	18.6215	18.7803	18.6803	17.5622	17.8529	17.8555	17.7905	17.8073	17.9091	17.7207	17.7589	17.8078	17.7346
Q6LZC3		0.422951	-0.100494		0.106156	0.0325715		UDP-N-acetyl-D-mannosamine dehydrogenase OS=Methanococcus maripaludis (strain S2 / LL) OX=267377 GN=wecC PE=1 SV=1								5	5	5	14.1	14.1	14.1	47.251	0	15.563	189600000	7	16.5201	16.4736	16.6218	16.8998	16.6454	16.3663	16.6582	16.5823	16.6819	16.5836	17.3086	16.991	17.485	17.3033	17.2595	17.2275	17.3686	17.0881	17.1268	17.3139
Q6LYF3		0.484188	-0.102338		0.429656	-0.130286		A1A0 ATPase, subunit H OS=Methanococcus maripaludis (strain S2 / LL) OX=267377 GN=atpH PE=4 SV=1								11	11	11	78.4	78.4	78.4	11.33	0	43.496	5959700000	22	21.2909	20.9233	21.2723	21.2614	21.3055	21.4162	21.2454	21.119	21.2396	21.1876	20.8155	21.4882	21.1712	21.1899	21.3882	21.2341	21.2478	21.3899	21.2815	21.3269
Q6M0T9		0.493081	-0.1027		0.595095	0.0763257		Phosphoribosylformylglycinamidine synthase subunit PurL OS=Methanococcus maripaludis (strain S2 / LL) OX=267377 GN=purL PE=3 SV=1								19	19	19	25.2	25.2	25.2	109.64	0	68.929	1014300000	30	19.1745	18.9847	19.296	19.1347	19.2736	19.4925	19.2487	19.2025	19.1748	19.2519	19.0235	18.9461	18.8414	18.7755	18.8526	18.7645	18.8527	18.9553	18.9634	18.9036
Q6LYP5		0.358117	-0.102744		0.0690291	-0.0220222		FAD synthase OS=Methanococcus maripaludis (strain S2 / LL) OX=267377 GN=ribL PE=3 SV=1								3	3	3	33.3	33.3	33.3	17.17	0	8.1363	104650000	5	14.934	14.9894	15.0805	14.9202	15.1596	15.0644	15.3418	15.3042	14.8339	15.0005	16.9837	16.8949	17.283	17.0967	17.1457	17.194	17.0791	16.7976	17.1421	17.0043
Q6LX86		1.351	-0.102749		0.0854381	0.0280307		Uncharacterized protein OS=Methanococcus maripaludis (strain S2 / LL) OX=267377 GN=ehaS PE=4 SV=1								8	8	8	41.3	41.3	41.3	23.891	0	28.367	1275700000	13	19.1254	19.093	19.0217	19.142	19.1333	19.2179	19.1568	19.2934	19.1533	19.2005	19.0254	18.5333	18.4694	18.6422	18.7181	18.6933	18.6612	18.5716	18.6015	18.621
Q6LWQ0		0.394796	-0.10276		1.65399	0.252754		Aspartate carbamoyltransferase OS=Methanococcus maripaludis (strain S2 / LL) OX=267377 GN=pyrB PE=3 SV=1								9	9	9	31.1	31.1	31.1	34.171	0	28.788	605360000	16	18.9274	18.6733	18.5764	18.9983	18.7495	18.8541	18.5598	18.9306	18.8784	18.7853	18.0407	18.1943	17.8857	17.9783	17.7409	17.7533	17.7465	17.672	17.8338	17.7496
Q6LZD3		0.365112	-0.106163		0.483047	0.133408		Proline--tRNA ligase OS=Methanococcus maripaludis (strain S2 / LL) OX=267377 GN=proS PE=3 SV=1								11	11	11	28	28	28	53.319	0	48.727	1048800000	17	18.8227	18.9476	19.0982	19.0753	19.1564	18.7324	19.3127	19.1094	18.9877	19.0066	18.9304	19.1302	19.3835	19.0613	19.076	19.2705	18.9636	18.8653	18.851	19.0281
Q6M0K7		0.688193	-0.108541		0.466156	-0.13108		Tyrosine--tRNA ligase OS=Methanococcus maripaludis (strain S2 / LL) OX=267377 GN=tyrS PE=3 SV=1								7	7	7	30.1	30.1	30.1	36.076	0	31.143	548840000	14	17.6184	17.8592	17.915	17.9562	18.0145	17.9011	17.8705	17.7687	17.9254	17.9252	17.3915	17.4555	17.849	17.827	17.6493	17.7853	17.6369	17.4508	17.829	17.5825
Q6LYV8		0.286488	-0.108601		0.481869	0.127791		Nicotinate-nucleotide pyrophosphorylase [carboxylating] OS=Methanococcus maripaludis (strain S2 / LL) OX=267377 GN=nadC PE=3 SV=1								3	3	3	17.2	17.2	17.2	31.388	0	11.321	31780000	3	13.0187	12.9161	13.3424	13.3519	13.0022	13.3098	12.8345	13.3714	13.3363	13.3633	16.0621	16.1999	16.5336	16.2903	15.9856	16.2227	16.1127	16.2384	15.975	16.2147
Q6LZK8		0.428861	-0.109591		0.675199	-0.470885		UPF0251 protein MMP0619 OS=Methanococcus maripaludis (strain S2 / LL) OX=267377 GN=MMP0619 PE=3 SV=1								5	5	5	49.6	49.6	49.6	15.301	0	10.617	216880000	7	17.1457	17.0317	17.0627	17.3481	17.0553	16.9372	17.0844	17.4052	17.3076	17.3117	15.4131	16.4402	16.0412	16.0153	17.0245	16.1954	15.8984	16.8953	16.5854	16.3619
Q6LXL4		0.461738	-0.11037		0.720945	0.139085		Tr-type G domain-containing protein OS=Methanococcus maripaludis (strain S2 / LL) OX=267377 GN=selB PE=4 SV=1								5	5	5	13.2	13.2	13.2	51.363	0	22.679	102960000	9	16.88	17.0587	17.189	17.0183	17.3037	17.2324	17.2656	17.1848	16.9129	17.0982	15.9702	15.92	16.0283	15.9451	15.7981	16.0902	15.7563	15.7559	15.6569	15.8289
Q6LY74		0.270499	-0.11168		0.625994	-0.313304		Uncharacterized protein OS=Methanococcus maripaludis (strain S2 / LL) OX=267377 GN=MMP1117 PE=4 SV=1								4	4	4	32.1	32.1	32.1	18.893	0	18.26	74430000	5	16.2436	16.0947	16.5291	16.2166	16.454	16.6974	16.4487	16.5823	16.0061	16.3036	12.2931	11.9936	12.6888	12.284	12.6862	13.0053	12.7137	12.1837	12.958	12.6479
Q6LYZ8		0.243258	-0.116181		0.669961	-0.143556		Uroporphyrinogen_deCOase domain-containing protein OS=Methanococcus maripaludis (strain S2 / LL) OX=267377 GN=mtbA PE=4 SV=1								9	9	9	38	38	38	37.276	0	41.965	2130900000	17	19.5144	19.5622	19.9827	19.7962	20.0702	20.2104	19.6398	19.4785	19.6208	19.7372	18.7568	18.7795	19.184	19.0248	19.1281	18.9537	19.177	19.0498	18.9685	19.0102
Q6M0B5		0.464926	-0.116427		0.626134	-0.263398		Glycosyl transferase, group 1 OS=Methanococcus maripaludis (strain S2 / LL) OX=267377 GN=MMP0356 PE=4 SV=1								2	2	2	4.6	4.6	4.6	46.137	0.0010695	3.6507	127020000	3	17.2252	17.3242	17.4557	17.3004	17.6155	17.6294	17.4965	17.4838	17.1829	17.3864	15.353	15.3211	15.8173	15.7856	15.7787	16.1687	15.9057	15.2911	15.6333	15.6459
Q6M060		1.27322	-0.11667		0.116402	-0.027915		Sulfopyruvate decarboxylase subunit alpha OS=Methanococcus maripaludis (strain S2 / LL) OX=267377 GN=comD PE=3 SV=1								3	3	3	19.2	19.2	19.2	18.467	0	6.3917	78975000	4	14.9248	15.1116	15.0597	15.2121	15.1466	15.0928	15.0849	15.134	15.2218	15.0742	16.4444	16.6807	16.3362	16.3908	16.471	16.4466	16.5417	16.6746	16.5654	16.5871
Q6LWY5		0.396696	-0.11678		0.0783334	-0.0454458		Conserved hypothetical archaeal protein OS=Methanococcus maripaludis (strain S2 / LL) OX=267377 GN=MMP1569 PE=4 SV=1								2	2	2	26.6	26.6	26.6	14.48	0	17.034	566230000	24	16.8397	16.9938	17.039	16.9459	16.7344	17.2137	17.0436	17.2641	17.2439	17.1142	17.5345	17.7266	17.6548	17.4386	17.6142	18.0835	17.4455	18.1524	17.3701	17.8422
Q6LY02		0.607891	-0.118647		0.128641	0.0595662		Methenyltetrahydromethanopterin cyclohydrolase OS=Methanococcus maripaludis (strain S2 / LL) OX=267377 GN=mch PE=3 SV=1								16	16	16	54.2	54.2	54.2	34.823	0	87.091	7948700000	44	21.3868	21.3258	21.4542	21.5494	21.4889	21.2133	21.6092	21.6212	21.5634	21.4532	20.8399	21.0686	20.8344	21.175	20.6721	21.0219	21.1095	20.512	20.6378	20.8412
Q6LYI3		0.160473	-0.118701		0.345696	-0.294789		IGPS domain-containing protein OS=Methanococcus maripaludis (strain S2 / LL) OX=267377 GN=trpC PE=4 SV=1								4	4	4	25.3	25.3	25.3	25.414	0	13.639	235090000	4	16.6654	17.8611	17.0893	17.5019	17.5507	17.0167	16.8977	17.513	17.4637	17.2561	16.8595	15.6779	15.6552	16.7571	15.8548	16.0979	16.7986	15.9453	16.7003	16.316
Q6M0T5		0.39688	-0.120618		0.395396	-0.106283		3,4-dihydroxy-2-butanone 4-phosphate synthase OS=Methanococcus maripaludis (strain S2 / LL) OX=267377 GN=ribB PE=3 SV=1								7	7	7	37.2	37.2	37.2	27.802	0	49.756	1385800000	11	18.5571	18.9281	18.8301	18.7331	19.0077	19.2197	18.7251	18.8219	18.8467	18.7888	17.3909	17.0415	17.5167	17.5633	17.4278	17.4761	17.493	17.371	17.2046	17.3227
Q6LX11		0.25571	-0.120723		0.384904	0.124182		Translin related protein OS=Methanococcus maripaludis (strain S2 / LL) OX=267377 GN=MMP1542 PE=4 SV=1								2	2	2	11.7	11.7	11.7	23.637	0	6.3688	40827000	3	13.9981	13.3366	13.0716	13.6008	13.5188	13.6972	13.4007	13.7417	13.5776	13.6039	14.753	14.5244	14.094	14.3805	14.3212	14.395	14.3976	14.1166	14.3867	14.4248
Q6LYF9		0.533008	-0.122401		2.42263	-0.153625		Replication protein A OS=Methanococcus maripaludis (strain S2 / LL) OX=267377 GN=rpa PE=1 SV=1								32	32	32	44.9	44.9	44.9	71.388	0	116.22	3056800000	61	20.4227	20.4451	20.6635	20.5043	20.7131	20.9229	20.5656	20.5503	20.5407	20.6042	20.6951	20.7304	20.5999	20.7914	20.8569	20.7608	20.8388	20.8641	20.8604	20.7602
Q6M0V8		0.487402	-0.122845		0.745896	0.271266		Coenzyme F390 synthetase OS=Methanococcus maripaludis (strain S2 / LL) OX=267377 GN=ftsA-2 PE=4 SV=1								4	4	4	12	12	12	48.525	0	9.7659	139020000	5	16.9795	16.9841	16.9837	17.415	17.0519	16.8716	17.0928	16.9671	17.2334	17.2172	14.6569	15.1137	15.4252	14.6949	14.4853	14.7873	14.9304	14.9657	14.9006	15.0229
Q6LYE4		0.504562	-0.123069		0.10142	0.0527833		DUF22 domain-containing protein OS=Methanococcus maripaludis (strain S2 / LL) OX=267377 GN=MMP1047 PE=4 SV=1								2	2	2	19	19	19	13.371	0	5.8842	1018900000	5	16.9326	16.6667	16.5068	17.0192	16.9306	16.8517	16.7238	16.6826	16.7428	16.584	18.062	18.875	18.8267	18.4718	18.6719	18.7233	18.3941	18.5668	18.383	18.4876
Q6LWN8		0.112545	-0.123121		0.0792512	0.169517		Arch_fla_DE domain-containing protein OS=Methanococcus maripaludis (strain S2 / LL) OX=267377 GN=flaE PE=4 SV=1								10	10	10	71.1	71.1	71.1	15.241	0	36.249	2774200000	19	20.0454	19.6696	18.7684	20.1556	19.4721	18.8735	20.2162	19.8245	19.1638	19.6392	20.4465	18.18	18.879	20.2355	18.3643	18.171	20.3643	18.9745	17.8843	19.3059
Q6LXI6		0.443654	-0.124838		0.622514	0.152079		50S ribosomal protein L30e OS=Methanococcus maripaludis (strain S2 / LL) OX=267377 GN=rpl30e PE=3 SV=1								2	2	2	37	37	37	10.824	0	6.0092	1265700000	5	15.3824	15.5406	15.1623	15.6447	15.4019	15.197	15.6824	15.4784	15.5151	15.4454	17.0399	16.7898	17.2774	16.9357	16.7687	17.084	16.7949	16.7851	16.9333	16.8302
Q6LYE9		0.516213	-0.125104		0.0308394	-0.00774384		V-type ATP synthase subunit C OS=Methanococcus maripaludis (strain S2 / LL) OX=267377 GN=atpC PE=3 SV=1								18	18	18	41.9	41.9	41.9	43.568	0	69.622	5786300000	42	20.6971	20.524	20.784	20.5566	20.9391	20.91	20.9418	20.7949	20.6184	20.7867	20.481	20.8629	20.8551	20.7677	20.7784	20.6995	20.7005	20.7978	20.7006	20.6964
Q6LXP5		1.397	-0.125923		1.28572	-0.228465		Response regulatory domain-containing protein OS=Methanococcus maripaludis (strain S2 / LL) OX=267377 GN=MMP1304 PE=4 SV=1								7	7	7	69.7	69.7	69.7	13.592	0	44.857	455510000	10	17.6831	17.8158	17.8416	17.9341	17.9758	17.9576	17.8451	17.9107	17.8133	17.9118	17.427	17.3433	17.2032	17.6476	17.5642	17.4215	17.7703	17.3682	17.5459	17.4608
Q6LYV4		0.785385	-0.126513		0.0163372	0.00465107		Uncharacterized protein OS=Methanococcus maripaludis (strain S2 / LL) OX=267377 GN=MMP0883 PE=4 SV=1								8	8	8	24.3	24.3	24.3	37.044	0	24.042	258990000	11	17.2978	17.0873	17.4812	17.3622	17.4044	17.3537	17.4155	17.4629	17.4928	17.4504	17.5807	17.4735	17.5179	17.6637	17.3876	17.3486	17.7537	17.4999	17.463	17.4451
Q6LXU3		1.26617	-0.12817		0.0516689	0.0247383		Phosphoribosylformylglycinamidine cyclo-ligase OS=Methanococcus maripaludis (strain S2 / LL) OX=267377 GN=purM PE=3 SV=1								16	16	16	45.6	45.6	45.6	38.198	0	51.292	1553700000	25	20.1328	20.0749	20.1882	20.2965	20.3857	20.2855	20.2413	20.1291	20.2226	20.2116	19.6382	20.0401	20.2289	20.1898	19.8797	20.1029	20.061	19.6413	19.7913	19.9377
Q6LWJ7		1.17444	-0.129922		0.347796	-0.0695362		HTH lysR-type domain-containing protein OS=Methanococcus maripaludis (strain S2 / LL) OX=267377 GN=MMP1712 PE=4 SV=1								14	14	14	60.1	60.1	60.1	32.94	0	47.133	2777100000	23	19.8003	19.9311	19.9295	20.0028	19.986	20.1901	19.9646	20.0128	19.9452	19.9993	19.9456	19.8888	19.6515	20.0172	19.8637	19.7119	19.9531	19.8868	19.9562	19.8661
Q6LYC0		0.397363	-0.130965		0.444925	0.0982413		UPF0201 protein MMP1071 OS=Methanococcus maripaludis (strain S2 / LL) OX=267377 GN=MMP1071 PE=3 SV=1								3	3	3	40.3	40.3	40.3	15.817	0	20.297	182180000	4	15.7912	15.9325	16.0159	15.9029	16.0004	16.4741	16.0678	16.0336	15.7862	15.9714	15.2914	15.1062	15.2578	14.8883	15.0577	15.342	15.22	15.0645	15.1489	15.127
Q6LY64		0.644812	-0.132918		1.59614	-0.574922		S1 motif domain-containing protein OS=Methanococcus maripaludis (strain S2 / LL) OX=267377 GN=MMP1127 PE=4 SV=1								3	3	3	5.2	5.2	5.2	80.486	0	6.3688	66510000	4	14.551	14.4462	14.5578	14.7907	14.5501	14.9122	14.5577	14.5995	14.4973	14.5579	15.3799	15.3475	15.4922	15.6185	16.0277	15.9738	15.803	16.6026	15.8632	15.7814
Q6LX61		0.568438	-0.137272		2.78019	-0.552531		5-deoxyadenosine deaminase OS=Methanococcus maripaludis (strain S2 / LL) OX=267377 GN=dadD PE=3 SV=1								9	9	9	26.8	26.8	26.8	46.702	0	26.142	456510000	12	18.1646	18.2892	17.8484	18.3397	18.3885	18.3074	18.1484	18.0589	18.185	18.2331	17.5157	17.2434	17.2911	18.0744	17.9922	18.0061	17.8799	17.62	17.843	17.689
Q6LYF5		0.585707	-0.137272		2.16368	-0.480265		PHB domain-containing protein OS=Methanococcus maripaludis (strain S2 / LL) OX=267377 GN=MMP1036 PE=4 SV=1								21	21	21	70.9	70.9	70.9	30.362	0	92.834	5675700000	52	20.3054	20.2821	20.5125	20.2789	20.3458	20.5788	20.4738	20.7164	20.6297	20.4009	21.0999	20.8289	20.6904	21.237	21.3999	21.0763	21.476	21.4095	21.5212	21.2104
Q6M0D3		0.743579	-0.137684		0.872947	-0.259301		UPF0284 protein MMP0338 OS=Methanococcus maripaludis (strain S2 / LL) OX=267377 GN=MMP0338 PE=3 SV=1								2	2	2	4.9	4.9	4.9	37.031	0	4.0603	101150000	3	16.6326	16.4935	16.7404	16.7735	16.7484	16.9751	16.5895	16.6574	16.8154	16.6481	15.1527	15.2732	15.6611	15.7345	15.2686	15.7656	15.7644	15.5389	15.6579	15.6201
Q6M0I8		0.417801	-0.137794		1.66048	0.33658		N5-carboxyaminoimidazole ribonucleotide mutase OS=Methanococcus maripaludis (strain S2 / LL) OX=267377 GN=purE PE=3 SV=1								2	2	2	12	12	12	16.987	0	4.206	64819000	3	15.4525	15.3743	15.2379	15.812	15.5875	15.3548	15.1596	15.3805	15.6618	15.4245	15.0428	15.3032	14.9115	14.5075	14.6676	14.9026	14.7511	14.8037	14.8631	14.8116
Q6LYL4		0.330867	-0.138326		0.46307	0.173968		CbiA domain-containing protein OS=Methanococcus maripaludis (strain S2 / LL) OX=267377 GN=CooC PE=4 SV=1								2	2	2	10.8	10.8	10.8	28.389	0.0010661	3.6289	146620000	4	15.0836	15.0549	15.3249	15.135	15.4714	15.7378	15.1496	15.3329	14.93	15.2779	15.69	15.8245	16.1128	15.7807	15.7941	16.1204	15.5634	15.5377	15.4144	15.7219
Q6LZH4		0.616844	-0.138798		0.634816	0.289756		Ketol-acid reductoisomerase (NADP(+)) OS=Methanococcus maripaludis (strain S2 / LL) OX=267377 GN=ilvC PE=3 SV=1								14	14	14	45.2	45.2	45.2	36.604	0	54.884	9615500000	29	21.4103	21.1395	21.2851	21.5865	21.5174	21.5715	21.3344	21.2608	21.2321	21.3704	20.5328	21.3194	21.1744	21.0676	20.5336	20.9428	20.81	20.4201	20.5407	20.8223
Q6LYW3		0.556964	-0.139588		0.295616	-0.0545985		Porphobilinogen deaminase OS=Methanococcus maripaludis (strain S2 / LL) OX=267377 GN=hemC PE=4 SV=1								8	8	8	30.9	30.9	30.9	33.952	0	23.082	222020000	11	16.2312	16.2712	16.5921	16.7717	16.4653	16.3039	16.552	16.4607	16.4732	16.3962	18.4767	18.5441	18.7205	18.6765	18.6483	18.7786	18.6703	18.5528	18.4838	18.6216
Q6M099;REV__Q6M099		1.65533	-0.141445		1.60589	0.327504		F420-dependent methylenetetrahydromethanopterin dehydrogenase OS=Methanococcus maripaludis (strain S2 / LL) OX=267377 GN=mtd PE=3 SV=1								22	22	22	70.8	70.8	70.8	29.907	0	176.65	62238000000	97	23.3447	23.3745	23.2201	23.3838	23.5013	23.4423	23.5155	23.5051	23.3793	23.3763	23.4701	23.6568	23.2249	23.2025	23.1367	22.9174	23.3108	23.0378	23.1333	23.2144
Q6M0D1		1.07546	-0.142877		0.471955	0.125243		Pyruvate carboxylase subunit B OS=Methanococcus maripaludis (strain S2 / LL) OX=267377 GN=pycB PE=4 SV=1								25	25	25	48	48	48	63.694	0	131.51	4302600000	47	20.5937	20.5745	20.8738	20.8813	20.8236	20.8143	20.8718	20.8197	20.7305	20.7705	21.0113	21.5484	21.4437	21.3138	21.1396	21.3148	21.2483	21.1068	21.1321	21.2224
Q6LYC1		1.64397	-0.143747		0.864195	-0.150737		Conserved hypothetical archaeal protein OS=Methanococcus maripaludis (strain S2 / LL) OX=267377 GN=MMP1070 PE=4 SV=1								6	6	6	32.9	32.9	32.9	24.446	0	29.014	1332600000	10	18.8855	18.9311	19.008	19.0393	19.088	19.2087	19.0184	19.1267	19.0307	18.9702	18.6235	18.42	18.3855	18.5459	18.7441	18.4253	18.6172	18.6767	18.7535	18.5394
Q6M0M1		0.344052	-0.144552		0.260655	-0.0479129		50S ribosomal protein L37Ae OS=Methanococcus maripaludis (strain S2 / LL) OX=267377 GN=rpl37ae PE=3 SV=1								2	2	2	21.9	21.9	21.9	10.674	0	8.9701	416390000	4	14.6997	14.6666	14.3478	14.9892	14.9233	14.5277	14.7806	14.2488	14.826	14.5137	16.5593	16.4074	16.7123	16.5225	16.5617	16.7125	16.6131	16.7013	16.5346	16.6356
Q6LWR1		0.501097	-0.145287		0.578731	-0.216176		HTH cro/C1-type domain-containing protein OS=Methanococcus maripaludis (strain S2 / LL) OX=267377 GN=MMP1646 PE=4 SV=1								6	6	6	24.7	24.7	24.7	18.319	0	17.26	1136100000	14	18.8285	18.6622	18.6855	18.9625	18.963	19.2016	18.7316	18.5824	18.783	18.8052	18.6942	19.1356	19.4115	19.1707	19.2778	19.6584	19.1362	19.209	19.3275	19.3035
Q6M0X7		0.921225	-0.148775		1.46885	0.304906		zf-C4_Topoisom domain-containing protein OS=Methanococcus maripaludis (strain S2 / LL) OX=267377 GN=MMP0141 PE=4 SV=1								5	5	5	21.7	21.7	21.7	33.992	0	21.317	384930000	7	17.6384	17.9608	17.79	17.9709	17.9917	18.006	17.7508	17.993	17.9584	18.0325	15.5496	15.7568	16.0045	15.5237	15.3545	15.6811	15.3913	15.5011	15.3405	15.4979
Q6LY23		1.17857	-0.148979		0.549759	-0.192053		Glyco_trans_2-like domain-containing protein OS=Methanococcus maripaludis (strain S2 / LL) OX=267377 GN=MMP1170 PE=4 SV=1								4	4	4	20.9	20.9	20.9	25.944	0	12.386	86768000	4	16.0701	15.7723	15.9398	16.086	16.0449	16.1664	16.0091	16.1371	16.0147	16.0677	14.1609	13.7849	13.613	13.7616	14.2861	13.9846	14.0171	14.2995	13.9209	14.1809
Q6LY03		0.453711	-0.149437		0.000405928	-5.14984e-05		Peptidyl-prolyl cis-trans isomerase OS=Methanococcus maripaludis (strain S2 / LL) OX=267377 GN=MMP1190 PE=3 SV=1								4	4	4	31.3	31.3	31.3	16.676	0	18.042	1341700000	20	16.847	16.9942	17.1641	16.8536	17.1297	17.3084	17.5121	17.0587	17.0446	17.083	17.3441	17.2407	17.314	17.328	17.3387	17.226	17.3808	17.2274	17.297	17.3457
Q6LXJ6		0.392427	-0.150141		2.20618	0.183951		Probable tRNA sulfurtransferase OS=Methanococcus maripaludis (strain S2 / LL) OX=267377 GN=thiI PE=3 SV=1								5	5	5	16.2	16.2	16.2	43.707	0	15.675	194920000	10	16.709	16.8945	17.2584	16.834	17.0558	17.507	17.0163	17.0882	17.1233	17.1214	17.5018	17.456	17.3808	17.2866	17.3146	17.1812	17.2205	17.3617	17.2092	17.2791
Q6LX30		0.75788	-0.150928		0.168555	0.0428435		Protein-export membrane protein SecD OS=Methanococcus maripaludis (strain S2 / LL) OX=267377 GN=secD PE=3 SV=1								5	5	5	11.6	11.6	11.6	41.426	0	18.976	440240000	8	14.9573	15.3379	15.3213	15.3773	15.4152	15.4642	15.1909	15.3006	15.3905	15.356	17.5644	17.598	17.4827	17.3884	17.6468	17.3584	17.3919	17.7543	17.4933	17.4097
Q6M0I5		0.457511	-0.151885		1.57668	0.173283		RCK N-terminal domain-containing protein OS=Methanococcus maripaludis (strain S2 / LL) OX=267377 GN=MMP0285 PE=4 SV=1								12	12	12	30.2	30.2	30.2	53.998	0	55.408	653680000	19	18.0745	18.1285	18.5413	18.4219	18.4426	18.0114	18.5209	18.5273	18.4757	18.3685	18.9183	19.096	18.9568	18.7025	18.7637	18.79	18.8343	18.9467	18.8653	18.8772
Q6LYF2		0.650767	-0.15201		0.445905	-0.100323		V-type ATP synthase subunit I OS=Methanococcus maripaludis (strain S2 / LL) OX=267377 GN=atpI PE=3 SV=1								24	24	24	35.7	35.7	35.7	74.703	0	104.56	7533700000	45	21.0073	20.6778	21.0841	20.8822	21.188	21.2187	21.1424	21.0568	20.9623	21.0471	20.7986	21.2759	21.2044	21.117	21.2281	21.1888	21.1494	21.2469	21.2296	21.1415
Q6LYH7		1.43605	-0.152706		0.477496	-0.110224		Elp3 domain-containing protein OS=Methanococcus maripaludis (strain S2 / LL) OX=267377 GN=MMP1014 PE=4 SV=1								6	6	6	20	20	20	40.574	0	53.476	362460000	11	18.1092	18.1247	18.1218	18.3469	18.3617	18.3632	18.2281	18.1344	18.1932	18.2354	17.69	18.0896	18.1825	18.0146	18.084	18.1069	18.0461	18.1882	18.1459	18.081
Q6LXH2		0.926837	-0.154599		1.01163	0.16454		Putative thymidylate synthase OS=Methanococcus maripaludis (strain S2 / LL) OX=267377 GN=thyA PE=3 SV=1								7	7	7	35.4	35.4	35.4	24.422	0	25.752	649430000	10	18.2123	18.2688	18.5987	18.5148	18.5835	18.4022	18.5375	18.5389	18.5104	18.4615	17.8311	17.7081	17.6458	17.3514	17.5371	17.5573	17.658	17.7386	17.5402	17.6128
Q6M110		0.468443	-0.154774		0.480207	0.156585		ABC-type Iron(III)-binding periplasmic protein OS=Methanococcus maripaludis (strain S2 / LL) OX=267377 GN=MMP0108 PE=4 SV=1								7	7	7	25.9	25.9	25.9	38.002	0	19.129	484790000	10	17.5309	17.4947	18.0903	18.1186	17.8071	17.8322	17.6984	17.8381	17.866	17.8432	17.5083	17.7165	17.5076	17.2879	17.727	17.3569	17.1762	17.2638	17.7135	17.3826
Q6M0W2		0.394287	-0.155111		0.735288	-0.132294		30S ribosomal protein S19e OS=Methanococcus maripaludis (strain S2 / LL) OX=267377 GN=rps19e PE=3 SV=1								8	8	8	48.9	48.9	48.9	15.601	0	32.725	6544400000	26	19.7501	19.7454	19.502	19.9938	19.8345	19.3169	20.1367	19.7918	19.852	19.7421	19.5306	19.7371	19.8166	19.8789	19.7381	19.961	19.7786	19.6667	19.9392	19.7293
Q6LWQ9		0.394378	-0.155544		0.181982	-0.123039		Uncharacterized protein OS=Methanococcus maripaludis (strain S2 / LL) OX=267377 GN=MMP1648 PE=4 SV=1								7	7	7	29	29	29	42.88	0	31.645	481840000	11	16.8176	16.5983	17.258	16.9339	17.135	17.3436	17.1314	16.7612	16.976	17.0276	18.3868	18.4948	17.9839	17.8255	18.7253	18.1312	18.32	18.9671	18.5002	18.4047
Q6LZG1		0.943326	-0.156921		1.13201	0.482189		Uncharacterized protein OS=Methanococcus maripaludis (strain S2 / LL) OX=267377 GN=MMP0668 PE=4 SV=1								3	3	3	14.9	14.9	14.9	23.478	0	5.7534	88058000	4	16.4654	16.5047	16.4212	16.7758	16.6283	16.533	16.8033	16.4477	16.5359	16.4747	14.7557	14.9138	15.4985	14.5728	14.2784	15.1014	14.568	14.6032	14.3193	14.6951
Q6M0E2		0.529206	-0.156995		0.342577	-0.0913226		Uncharacterized protein OS=Methanococcus maripaludis (strain S2 / LL) OX=267377 GN=MMP0329 PE=4 SV=1								1	1	1	17.7	17.7	17.7	11.252	0	8.5144	94839000	2	15.101	15.1983	14.7111	15.0679	14.9341	15.3065	15.1145	15.3924	15.1473	15.0724	15.179	15.0872	14.7945	15.2388	15.3208	15.062	15.1097	14.9343	15.0036	14.8873
Q6LYG3		0.60652	-0.158406		0.164442	-0.0523109		NFACT-R_1 domain-containing protein OS=Methanococcus maripaludis (strain S2 / LL) OX=267377 GN=MMP1028 PE=4 SV=1								3	3	3	4.6	4.6	4.6	78.551	0	7.2409	144390000	4	15.6801	15.7902	15.5984	15.7017	16.0744	15.9052	15.8971	15.9854	15.5241	15.7594	15.4775	15.3244	15.5751	15.6191	15.7702	15.6097	15.4289	15.2376	15.4025	15.4287
P60850		0.431351	-0.158961		0.91202	0.188988		DNA/RNA-binding protein Alba OS=Methanococcus maripaludis (strain S2 / LL) OX=267377 GN=albA PE=3 SV=1								3	3	3	19.1	19.1	19.1	9.9394	0	6.8345	89800000	5	13.813	13.3542	13.9625	13.5444	13.7561	13.9498	14.0917	13.9675	13.9037	13.7326	17.3547	17.8334	17.5331	17.4302	17.4986	17.4339	17.3146	17.3966	17.2347	17.4759
Q6M197		0.771075	-0.159445		0.757868	-0.114571		Putative nickel-responsive regulator OS=Methanococcus maripaludis (strain S2 / LL) OX=267377 GN=MMP0020 PE=3 SV=1								9	9	9	58.2	58.2	58.2	16.059	0	29.117	1054600000	15	19.0276	19.0621	19.3107	19.3827	19.2819	19.3811	19.02	19.2831	19.4087	19.2843	19.4376	19.4403	19.2538	19.5217	19.5166	19.3026	19.6344	19.4875	19.4881	19.4699
P62348		0.546389	-0.159614		0.454368	-0.139475		Phosphoribosyl-ATP pyrophosphatase OS=Methanococcus maripaludis (strain S2 / LL) OX=267377 GN=hisE PE=3 SV=1								7	7	7	70.8	70.8	70.8	10.885	0	29.889	873430000	12	18.0833	17.8257	17.5406	18.1867	17.8414	17.8004	18.1179	17.9137	17.9968	17.8913	17.1006	17.0349	17.3566	17.1566	17.3713	17.5615	17.1326	17.0834	17.5156	17.2258
Q6LYF0		0.36554	-0.160332		0.0199568	0.0061725		V-type ATP synthase subunit E OS=Methanococcus maripaludis (strain S2 / LL) OX=267377 GN=atpE PE=3 SV=1								18	18	18	55.7	55.7	55.7	22.777	0	118.42	9908300000	40	20.8807	20.4273	21.0172	20.6778	20.9641	21.1185	21.3284	20.83	20.6935	20.8985	21.0315	21.5359	21.4023	21.3354	21.4362	21.2704	21.2934	21.298	21.2689	21.3114
Q6LWR2		1.23558	-0.161703		0.0223925	0.0102681		Isopentenyl phosphate kinase OS=Methanococcus maripaludis (strain S2 / LL) OX=267377 GN=MMP1645 PE=3 SV=1								5	5	5	21	21	21	29.079	0	9.7117	191560000	5	17.254	17.4125	17.0939	17.4351	17.4721	17.2985	17.4629	17.3865	17.4359	17.4261	15.0726	15.1435	14.8297	15.2377	15.2391	14.7316	15.1565	14.7193	14.9456	14.8213
Q6LXN2		1.06883	-0.16243		0.0603986	-0.0146052		Uncharacterized protein OS=Methanococcus maripaludis (strain S2 / LL) OX=267377 GN=MMP1317 PE=4 SV=1								6	6	6	29.5	29.5	29.5	29.162	0	24.747	347630000	11	17.2112	17.1987	17.3249	17.5283	17.4535	17.443	17.5188	17.2135	17.2871	17.456	18.1083	18.2198	18.3403	18.3322	18.1672	18.3182	18.261	18.3273	18.0185	18.2532
Q6LYZ5		0.242744	-0.162871		1.27438	-0.34423		Uroporphyrinogen_deCOase domain-containing protein OS=Methanococcus maripaludis (strain S2 / LL) OX=267377 GN=mtbA PE=4 SV=1								5	5	5	32.1	32.1	32.1	32.46	0	30.891	1212800000	10	18.2194	17.8938	18.8097	18.5303	18.7812	18.905	18.4796	18.1114	18.0155	18.4154	16.694	16.8766	16.711	17.232	17.4372	17.0985	17.0882	16.7065	17.0663	17.0757
Q6LY97		0.627008	-0.163325		0.0503614	0.00800419		Phosphoenolpyruvate synthase OS=Methanococcus maripaludis (strain S2 / LL) OX=267377 GN=ppsA PE=3 SV=1								42	42	42	51.7	51.7	51.7	83.397	0	189.7	11058000000	93	21.1482	21.3014	21.7473	21.5988	21.5521	21.4276	21.6376	21.6162	21.5415	21.4656	22.0062	22.1422	21.8901	22.0668	22.0367	21.9537	21.9812	22.0397	21.9508	21.9982
Q6LZN1		1.36648	-0.163611		0.257678	-0.0922826		CbiA domain-containing protein OS=Methanococcus maripaludis (strain S2 / LL) OX=267377 GN=MMP0593 PE=4 SV=1								11	11	11	47.9	47.9	47.9	27.422	0	53.009	3224900000	22	18.998	19.1039	19.1875	19.3745	19.2294	19.3384	19.2363	19.1096	19.2723	19.1974	19.1264	19.6702	19.6961	19.6686	19.4753	19.5468	19.8111	19.4211	19.6162	19.5559
Q6LXF3		0.353334	-0.164883		0.0153908	-0.00385443		Uncharacterized metallohydrolase MMP1398 OS=Methanococcus maripaludis (strain S2 / LL) OX=267377 GN=MMP1398 PE=1 SV=1								5	5	5	22.4	22.4	22.4	46.968	0	21.388	246110000	7	16.2117	15.8971	16.2828	15.8765	16.3814	16.5948	16.6886	16.1309	16.1003	16.3079	16.9553	16.8204	16.7538	16.852	16.869	16.713	17.0236	16.6929	16.9315	16.8382
Q6LXB8		0.817765	-0.167935		0.153398	-0.0296297		Transcription elongation factor Spt5 OS=Methanococcus maripaludis (strain S2 / LL) OX=267377 GN=spt5 PE=3 SV=1								5	5	5	44.5	44.5	44.5	16.027	0	12.183	869720000	8	18.5826	18.6034	18.6638	18.7882	18.6972	18.5417	18.9937	18.97	18.7164	18.6468	18.6055	18.5043	18.6979	18.817	18.6724	18.5665	18.6608	18.5258	18.551	18.5543
Q6LZN2		0.35839	-0.168582		1.10865	0.267052		Uncharacterized protein OS=Methanococcus maripaludis (strain S2 / LL) OX=267377 GN=MMP0592 PE=4 SV=1								1	1	1	13.3	13.3	13.3	6.8482	0.006079	2.7032	87829000	2	15.8157	15.6452	15.976	15.5401	15.9315	16.3146	16.3916	15.9651	15.7423	15.9237	16.8463	16.9956	16.6888	16.4139	16.5676	16.3587	16.7351	16.5165	16.8673	16.6265
Q6M135		1.30761	-0.168645		0.94186	-0.332026		4Fe-4S ferredoxin-type domain-containing protein OS=Methanococcus maripaludis (strain S2 / LL) OX=267377 GN=MMP0083 PE=4 SV=1								11	11	11	25.9	25.9	25.9	40.358	0	57.879	2864600000	21	19.9165	19.9829	19.8769	20.0801	20.1156	20.2565	20.1159	19.9008	20.0956	20.0789	19.5057	19.3868	19.8419	20.1518	19.5805	19.7582	20.2169	19.6809	20.0725	19.805
Q6LXF0		0.645961	-0.168817		0.225262	0.0432526		Elongation factor 1-beta OS=Methanococcus maripaludis (strain S2 / LL) OX=267377 GN=ef1b PE=3 SV=1								7	7	7	87.6	87.6	87.6	9.8202	0	24.741	3489700000	16	18.1772	18.0076	18.16	18.3039	18.4012	17.9623	18.5496	18.336	18.1496	18.086	19.969	20.199	20.3482	20.0716	20.1349	20.1669	20.148	20.1828	20.0688	20.1268
Q6LYV7		0.297647	-0.168931		1.76919	0.337362		Iso_dh domain-containing protein OS=Methanococcus maripaludis (strain S2 / LL) OX=267377 GN=aksF PE=4 SV=1								2	2	2	8.6	8.6	8.6	37.967	0	14.016	37622000	3	13.0558	12.884	12.5284	13.4387	13.1034	12.4142	13.1209	13.1506	12.7222	13.0715	14.5152	14.7872	14.9258	14.3981	14.4273	14.5861	14.3889	14.4339	14.1982	14.4293
Q6LX23		0.414809	-0.169286		1.0034	0.182245		Uncharacterized protein OS=Methanococcus maripaludis (strain S2 / LL) OX=267377 GN=MMP1530 PE=4 SV=1								2	2	2	21.9	21.9	21.9	11.097	0	6.03	27642000	3	13.6419	13.57	13.7331	14.2055	13.4542	13.916	13.457	13.9748	13.8984	13.689	15.9525	15.5205	15.7381	15.437	15.6399	15.5629	15.5182	15.6599	15.5109	15.5792
Q6LZE6		0.935016	-0.17161		1.20462	-0.214887		Signal recognition particle receptor FtsY OS=Methanococcus maripaludis (strain S2 / LL) OX=267377 GN=ftsY PE=3 SV=1								12	12	12	27.7	27.7	27.7	42.007	0	44.046	1657400000	20	19.0792	19.0255	18.9487	19.0235	19.1544	19.3664	19.2863	19.3072	18.9987	19.0594	19.4556	19.4913	19.6491	19.6676	19.7876	19.9712	19.7878	19.5217	19.7455	19.6455
P60846		0.59507	-0.172996		0.965654	-0.170361		50S ribosomal protein L4 OS=Methanococcus maripaludis (strain S2 / LL) OX=267377 GN=rpl4 PE=3 SV=1								16	16	16	61.1	61.1	61.1	27.126	0	85.798	7591800000	36	20.9906	20.9805	20.6822	21.1979	21.0694	20.6774	21.2701	21.0511	21.0788	20.9909	20.7611	20.759	21.1253	21.109	21.0004	21.1821	20.99	20.9868	21.0449	21.008
Q6LY46		0.452746	-0.173329		0.460034	-0.171757		50S ribosomal protein L37e OS=Methanococcus maripaludis (strain S2 / LL) OX=267377 GN=rpl37e PE=3 SV=1								2	2	2	21.9	21.9	21.9	7.2565	0	5.2927	167580000	4	17.1473	16.9194	16.8158	17.3862	17.0374	16.7096	17.2631	16.9956	17.413	17.0726	17.2649	17.4888	17.9111	17.8637	17.689	17.9519	17.7832	17.3881	17.6844	17.647
Q6M039		0.590517	-0.17426		0.173081	0.0444762		Flavodoxin-like domain-containing protein OS=Methanococcus maripaludis (strain S2 / LL) OX=267377 GN=MMP0433 PE=4 SV=1								3	3	3	27.4	27.4	27.4	18.815	0	9.0244	173960000	3	15.4802	15.2585	15.3126	15.3078	15.3445	15.9263	15.4453	15.5954	15.5287	15.5322	15.4012	15.1812	15.1031	15.3301	15.2498	14.9478	15.2693	15.1156	15.1915	15.3903
Q6M127		1.36662	-0.17474		0.261639	-0.0856441		Conserved hypothetical archaeal protein OS=Methanococcus maripaludis (strain S2 / LL) OX=267377 GN=MMP0091 PE=4 SV=1								7	7	7	36.1	36.1	36.1	23.122	0	15.405	1076000000	14	19.6952	19.6501	19.8374	19.8785	19.9403	20.0791	19.8077	19.8082	19.9	19.8361	19.4783	19.3637	19.2985	19.3846	19.3325	19.1843	19.4437	19.6915	19.7582	19.4838
O30520		0.621167	-0.174962		0.326793	0.148032		Type-2 serine--tRNA ligase OS=Methanococcus maripaludis (strain S2 / LL) OX=267377 GN=serS PE=1 SV=2								18	18	18	38.5	38.5	38.5	59.586	0	74.277	2676900000	36	19.7043	19.9024	20.0445	20.036	20.3168	20.2487	20.0444	19.9327	19.7736	19.9579	20.2292	20.6439	20.9902	20.5809	20.4372	20.8513	20.4234	20.2699	20.2756	20.5309
Q6LYQ4		0.457355	-0.176054		0.62419	-0.152161		Conserved hypothetical archaeal protein OS=Methanococcus maripaludis (strain S2 / LL) OX=267377 GN=MMP0934 PE=4 SV=1								9	9	9	30.5	30.5	30.5	39.529	0	46.999	1429400000	15	18.7348	18.7904	19.0817	18.9429	19.0773	19.5697	18.9227	18.8333	18.9242	19.0416	19.1181	18.8941	19.0167	18.9606	19.3865	19.0111	19.0593	19.1801	19.3732	19.1034
Q6LYD5		2.0649	-0.176693		0.476106	-0.0593071		YcaO domain-containing protein OS=Methanococcus maripaludis (strain S2 / LL) OX=267377 GN=MMP1056 PE=4 SV=1								9	9	9	24.2	24.2	24.2	45.008	0	23.285	395490000	12	17.7126	17.8584	17.8456	17.9236	17.9638	18.1006	17.9971	17.9755	17.9328	17.8959	17.3533	17.3485	17.4076	17.3705	17.4091	17.5857	17.3289	17.3903	17.49	17.448
Q6M0F4		0.989305	-0.177303		1.55989	-0.17467		Fructose-1,6-bisphosphate aldolase/phosphatase OS=Methanococcus maripaludis (strain S2 / LL) OX=267377 GN=fbp PE=3 SV=1								18	18	18	55.4	55.4	55.4	42.514	0	128.75	18266000000	63	21.8529	21.9485	22.0615	22.1214	22.2715	22.32	22.1221	21.9827	21.9718	22.0463	21.541	21.5976	21.8108	21.8255	21.8408	21.8785	21.8768	21.7359	21.7892	21.7771
Q6M158		1.77989	-0.178019		0.592996	-0.124005		Conserved hypothetical archaeal protein OS=Methanococcus maripaludis (strain S2 / LL) OX=267377 GN=MMP0059 PE=4 SV=1								15	15	15	72.1	72.1	72.1	16.062	0	44.552	4558500000	28	20.5729	20.6514	20.5176	20.8347	20.6113	20.706	20.822	20.7812	20.7967	20.7094	20.39	20.7949	20.4556	20.692	20.5633	20.6888	20.6801	20.5747	20.8262	20.6468
Q6LX85		0.612922	-0.178196		0.292258	-0.0984475		HTH_11 domain-containing protein OS=Methanococcus maripaludis (strain S2 / LL) OX=267377 GN=ehaT PE=4 SV=1								1	1	1	9.2	9.2	9.2	15.493	0.0010823	3.907	67655000	3	12.62	12.68	12.7626	13.174	12.582	12.9191	12.608	12.915	12.9963	12.8293	16.4032	16.1151	15.9355	16.2064	16.5537	16.3687	16.0573	16.218	16.0944	16.2706
Q6LXN4		1.37169	-0.17877		0.470086	0.124657		POR domain-containing protein OS=Methanococcus maripaludis (strain S2 / LL) OX=267377 GN=korG PE=4 SV=1								6	6	6	41.2	41.2	41.2	19.312	0	27.461	605240000	11	17.4272	17.2787	17.4483	17.4132	17.6721	17.6289	17.618	17.5992	17.4495	17.4681	19.2049	19.7084	19.5895	19.2908	19.4738	19.5566	19.2768	19.3766	19.2831	19.4163
Q6M157		0.426481	-0.179272		0.218629	-0.0687914		50S ribosomal protein L18Ae OS=Methanococcus maripaludis (strain S2 / LL) OX=267377 GN=rpl18a PE=3 SV=1								6	6	6	65.8	65.8	65.8	8.635	0	42.691	2320500000	14	19.1178	18.9449	18.7489	19.0153	19.1952	18.741	19.6319	19.0907	19.0246	18.9563	19.3206	19.4172	19.7872	19.5623	19.5784	19.8379	19.4124	19.4846	19.5871	19.4902
Q6M0X1		0.737889	-0.180216		0.999045	0.207648		Nitrogenase iron protein OS=Methanococcus maripaludis (strain S2 / LL) OX=267377 GN=nifH PE=3 SV=1								6	6	6	27.2	27.2	27.2	34.192	0	11.882	177880000	8	16.0506	15.9743	16.5075	16.2212	16.3736	16.4703	16.3111	16.3275	16.4423	16.4335	17.5263	17.184	17.2818	17.0946	17.2816	17.0113	16.9504	17.3145	17.0859	17.2018
Q6LX33		0.435584	-0.180788		1.85214	-0.705124		cobW domain-containing protein OS=Methanococcus maripaludis (strain S2 / LL) OX=267377 GN=MMP1520 PE=4 SV=1								9	9	9	41.1	41.1	41.1	24.848	0	27.756	1695600000	17	19.9175	19.6364	20.0167	19.9387	20.1891	20.5554	19.886	19.793	19.8639	20.0188	18.5931	19.2443	19.2511	19.6634	19.6409	20.1333	19.6454	19.3606	19.9641	19.5569
Q6LZS4		0.83504	-0.181062		0.349799	0.138286		PBPb domain-containing protein OS=Methanococcus maripaludis (strain S2 / LL) OX=267377 GN=MMP0550 PE=4 SV=1								9	9	9	42.8	42.8	42.8	28.89	0	70.24	1322700000	15	18.2511	18.3911	18.0535	18.6935	18.4729	18.2891	18.3625	18.3178	18.342	18.3543	18.8338	19.0014	19.6656	19.1052	19.0427	19.0236	19.1038	18.9302	18.9664	19.0949
Q6LYH4		0.555778	-0.181763		0.949228	0.104165		Aspartokinase OS=Methanococcus maripaludis (strain S2 / LL) OX=267377 GN=lysC PE=3 SV=1								12	12	12	30.1	30.1	30.1	50.772	0	47.126	1194200000	24	18.6668	18.5017	18.903	18.743	19.0755	19.2284	18.7616	18.7633	18.6619	18.7615	18.4727	18.7042	18.7069	18.5126	18.5074	18.584	18.5591	18.5243	18.4553	18.5753
Q6LYM0		1.95694	-0.182306		0.350157	0.10685		Adenylosuccinate lyase OS=Methanococcus maripaludis (strain S2 / LL) OX=267377 GN=purB PE=3 SV=1								19	19	19	40.8	40.8	40.8	50.714	0	75.873	2454300000	35	19.8441	19.8948	19.771	20.0761	20.0773	20.1076	19.9898	19.907	19.9558	19.962	19.8889	20.2162	20.4685	20.0375	20.1068	20.3173	20.0038	20.0712	19.9694	20.149
Q6LXM4		0.3695	-0.183779		2.08816	-0.189735		DNA-directed RNA polymerase subunit N OS=Methanococcus maripaludis (strain S2 / LL) OX=267377 GN=rpoN PE=3 SV=1								1	1	1	22.1	22.1	22.1	8.2693	0	5.3764	102330000	2	12.8453	12.5672	13.1456	13.2351	13.2068	12.9707	12.6846	12.6735	13.4483	12.8767	16.4466	16.4181	16.5292	16.5387	16.6611	16.7398	16.6685	16.5877	16.7304	16.6044
Q6LYH8		0.676033	-0.184137		0.193849	-0.0353689		Carbamoyl-phosphate synthase large chain OS=Methanococcus maripaludis (strain S2 / LL) OX=267377 GN=carB PE=3 SV=1								32	32	32	36.7	36.7	36.7	119.55	0	120.31	2103300000	47	20.1743	20.2686	20.5905	20.3418	20.6024	20.8379	20.4727	20.5131	20.4035	20.4725	20.052	20.3446	20.252	20.3426	20.2415	20.2911	20.3041	20.1441	20.1859	20.2311
Q6M0E1		0.490386	-0.185		1.46485	-0.240589		CbiC domain-containing protein OS=Methanococcus maripaludis (strain S2 / LL) OX=267377 GN=cbiC PE=4 SV=1								2	2	2	17.1	17.1	17.1	22.537	0	7.2818	51386000	2	13.4744	12.8796	12.922	13.1933	13.6552	13.1937	13.3259	13.2207	13.0729	13.1625	17.0716	16.8116	17.1286	17.2604	17.0903	17.3612	17.3492	17.1373	17.2689	17.2526
Q6LXN3		1.41157	-0.185438		1.28422	0.226578		TPP_enzyme_C domain-containing protein OS=Methanococcus maripaludis (strain S2 / LL) OX=267377 GN=korB PE=4 SV=1								4	4	4	12.8	12.8	12.8	29.265	0	7.3848	382010000	5	17.3313	17.2587	17.1994	17.5002	17.5706	17.3178	17.5772	17.3687	17.3569	17.3958	17.0883	17.4697	17.4039	17.1455	17.1984	17.1662	17.1057	16.993	16.9555	17.0013
P61300		0.635367	-0.185443		0.6171	0.109627		30S ribosomal protein S8e OS=Methanococcus maripaludis (strain S2 / LL) OX=267377 GN=rps8e PE=3 SV=1								6	6	6	56.2	56.2	56.2	14.331	0	17.503	3653500000	18	19.3494	19.2042	19.1189	19.6158	19.4599	18.9753	19.4939	19.3924	19.5205	19.3096	19.3334	19.4796	19.6917	19.4293	19.4559	19.4863	19.3512	19.3843	19.2445	19.3598
Q6M0I0		1.11871	-0.18613		0.14796	0.0557489		Nascent polypeptide-associated complex protein OS=Methanococcus maripaludis (strain S2 / LL) OX=267377 GN=nac PE=3 SV=1								6	6	6	40.5	40.5	40.5	14.13	0	20.413	1301500000	11	18.8539	18.8133	18.8259	19.223	18.9926	19.1632	18.9708	18.8254	18.9277	18.9835	18.0737	18.6393	18.4606	18.5184	18.3048	18.5342	18.3023	18.1752	18.1778	18.3405
Q6LXN1		0.611424	-0.190989		0.19802	-0.0563911		30S ribosomal protein S13 OS=Methanococcus maripaludis (strain S2 / LL) OX=267377 GN=rps13 PE=3 SV=1								9	9	9	49.7	49.7	49.7	17.171	0	36.725	3404500000	14	19.1755	18.9156	18.9162	19.2232	19.3887	18.9792	19.4998	18.8889	19.1808	19.1213	20.2114	20.2243	20.6598	20.3483	20.2965	20.5844	20.4033	20.4457	20.4511	20.4552
Q6LXW6		0.930855	-0.191881		0.425595	0.0938752		DNA polymerase, beta-like region OS=Methanococcus maripaludis (strain S2 / LL) OX=267377 GN=MMP1230 PE=4 SV=1								17	17	17	56	56	56	40.914	0	62.278	1485600000	26	19.2619	19.1575	19.0606	19.3706	19.5377	19.5674	19.213	19.1874	19.2351	19.2953	19.2464	19.306	19.5472	19.3696	19.333	19.3364	19.3838	19.0726	19.1405	19.2458
Q6LYH3		0.645337	-0.192712		0.138014	-0.0609592		Putative (R)-citramalate synthase CimA OS=Methanococcus maripaludis (strain S2 / LL) OX=267377 GN=cimA PE=3 SV=1								15	15	15	37.8	37.8	37.8	53.434	0	80.438	1623500000	25	19.04	18.9378	19.4939	19.2543	19.5186	19.5669	19.248	19.3174	19.1946	19.2679	19.737	20.5102	20.1952	20.3448	20.1566	20.3754	20.2489	20.0762	20.0485	20.2135
Q6M172		1.01072	-0.19429		1.71046	-0.402733		Bifunctional short chain isoprenyl diphosphate synthase OS=Methanococcus maripaludis (strain S2 / LL) OX=267377 GN=idsA PE=3 SV=1								7	7	7	37.5	37.5	37.5	35.802	0	47.115	920410000	12	18.2327	18.0404	18.006	18.1278	18.2757	18.1013	18.4694	18.4303	18.3193	18.2909	18.801	18.6257	19.0037	18.9993	19.122	19.4505	19.0325	19.289	19.384	19.1196
Q6LWW8		0.659545	-0.19798		0.210909	0.105591		Conserved hypothetical archaeal protein OS=Methanococcus maripaludis (strain S2 / LL) OX=267377 GN=MMP1586 PE=4 SV=1								7	7	7	86.2	86.2	86.2	9.0322	0	104.37	9978700000	22	19.4517	19.358	19.0742	19.2589	19.4858	19.5021	19.4563	19.3694	19.8832	19.4359	19.9974	19.786	19.4023	19.5139	19.6923	19.1671	19.9939	19.7655	19.6053	19.7011
Q6LYS0		1.86948	-0.198915		1.07874	-0.196343		Putative asparagine synthetase [glutamine-hydrolyzing] OS=Methanococcus maripaludis (strain S2 / LL) OX=267377 GN=asnB PE=4 SV=1								4	4	4	7.6	7.6	7.6	58.798	0	9.7067	199160000	6	17.4108	17.583	17.4584	17.5754	17.6021	17.6905	17.8068	17.6954	17.7278	17.6347	17.7662	17.6119	18.007	17.9489	18.062	18.1383	17.9579	17.8376	18.0035	17.9984
Q6LXA9		0.687534	-0.20183		0.192761	0.0483831		OBG-type G domain-containing protein OS=Methanococcus maripaludis (strain S2 / LL) OX=267377 GN=MMP1443 PE=4 SV=1								9	9	9	28.3	28.3	28.3	41.142	0	24.137	466520000	14	18.0637	18.3729	18.1623	18.5127	18.2781	18.0515	18.5855	18.6369	18.3439	18.2787	17.8662	17.9475	18.1629	18.019	17.9872	18.1532	17.8114	17.8041	17.888	17.8856
Q6M0J2		0.81972	-0.203515		0.707352	-0.186976		Uncharacterized protein OS=Methanococcus maripaludis (strain S2 / LL) OX=267377 GN=MMP0278 PE=4 SV=1								9	9	9	69.3	69.3	69.3	16.926	0	45.777	1852400000	18	18.9735	19.1133	19.1879	19.2049	19.372	19.6366	19.0372	19.2745	19.2455	19.2834	19.3622	19.1824	19.1035	19.2822	19.3403	19.1393	19.3697	19.6478	19.6386	19.3564
P61731		2.1044	-0.203537		0.0753953	0.0434831		Peptide chain release factor subunit 1 OS=Methanococcus maripaludis (strain S2 / LL) OX=267377 GN=prf1 PE=3 SV=1								9	9	9	24.6	24.6	24.6	47.249	0	43.974	573430000	17	17.3296	17.5423	17.5607	17.7512	17.6324	17.6461	17.6934	17.7059	17.6573	17.5285	18.0932	18.5073	18.9644	18.6498	18.3901	18.794	18.5034	18.2552	18.2764	18.5509
Q6M079		1.7215	-0.204798		1.24837	0.137534		Phosphoribosylamine--glycine ligase OS=Methanococcus maripaludis (strain S2 / LL) OX=267377 GN=purD PE=3 SV=1								13	13	13	37.8	37.8	37.8	48.795	0	44.228	1071800000	18	19.1518	18.9427	19.2456	19.3567	19.3083	19.3334	19.3851	19.3027	19.2226	19.2586	19.2734	19.4726	19.4587	19.3741	19.1995	19.2644	19.2977	19.2769	19.1716	19.2782
Q6M051		1.46464	-0.205154		0.664012	0.158123		CBS domain Related protein OS=Methanococcus maripaludis (strain S2 / LL) OX=267377 GN=MMP0420 PE=4 SV=1								12	12	12	38.9	38.9	38.9	37.254	0	48.91	1041100000	19	18.6575	18.7316	18.924	18.9206	18.9897	19.1498	18.8918	19.0082	18.8968	18.9026	19.2531	19.5252	19.7263	19.4288	19.2794	19.5141	19.3632	19.1545	19.3204	19.4121
Q6LX07		0.529308	-0.206721		0.339115	0.0928535		30S ribosomal protein S19 OS=Methanococcus maripaludis (strain S2 / LL) OX=267377 GN=rps19 PE=3 SV=1								7	7	7	29.2	29.2	29.2	18.524	0	20.401	2300000000	11	19.0971	19.0081	18.6861	19.3565	19.2631	18.638	19.3099	19.0018	19.2536	19.0901	18.4297	18.5624	18.9534	18.5173	18.5572	18.7473	18.527	18.5071	18.4778	18.4948
Q6LX73		1.12883	-0.206894		0.247565	0.0551882		Diadenylate cyclase OS=Methanococcus maripaludis (strain S2 / LL) OX=267377 GN=dacZ PE=3 SV=1								2	2	2	8.3	8.3	8.3	34.566	0	7.5347	114630000	5	15.1012	14.8705	15.0469	15.3263	15.2209	15.4039	15.01	15.2327	15.0849	15.2196	16.425	16.0643	16.0751	16.2328	16.1693	16.1054	16.1961	16.0139	16.08	16.117
Q6LWR0		1.31839	-0.208766		0.431434	-0.12693		Proteasome-activating nucleotidase OS=Methanococcus maripaludis (strain S2 / LL) OX=267377 GN=pan PE=3 SV=1								16	16	16	53.6	53.6	53.6	45.852	0	74.452	1893800000	27	18.5571	18.5091	18.6878	18.74	18.8738	18.5656	18.9061	18.9141	18.7608	18.7395	19.7535	19.45	20.0481	19.8963	19.8367	20.0275	19.9288	19.6783	19.8973	19.7933
Q6LX63		0.924796	-0.208829		0.896714	0.10547		Bifunctional NADP phosphatase/NAD kinase OS=Methanococcus maripaludis (strain S2 / LL) OX=267377 GN=MMP1489 PE=3 SV=1								13	13	13	29.3	29.3	29.3	62.594	0	34.958	451490000	18	18.3279	18.1607	18.4686	18.5462	18.4926	18.776	18.2427	18.5523	18.5576	18.4867	18.2397	18.2188	18.1506	17.9122	18.1174	18.1251	18.1033	18.2042	18.123	18.0705
Q6M155		0.469389	-0.209088		0.102254	-0.0475044		50S ribosomal protein L31e OS=Methanococcus maripaludis (strain S2 / LL) OX=267377 GN=rpl31e PE=3 SV=1								4	4	4	34.9	34.9	34.9	9.6693	0	11.568	1275200000	7	18.0868	17.9625	17.6273	18.521	18.0496	17.5944	18.2377	18.0164	18.1886	18.0087	17.3396	17.5774	17.9743	17.7922	17.4447	17.9601	17.7921	17.4711	17.6072	17.5637
Q6LZL5		1.76968	-0.209218		0.404233	0.0774504		tRNA-guanine(15) transglycosylase OS=Methanococcus maripaludis (strain S2 / LL) OX=267377 GN=tgtA PE=3 SV=1								7	7	7	10.3	10.3	10.3	74.401	0	18.436	233520000	13	17.4632	17.5552	17.763	17.8545	17.7624	17.771	17.7314	17.8749	17.8239	17.7324	17.962	17.9881	18.223	18.1046	17.9881	17.9372	18.0815	17.971	17.7989	17.9482
Q6LXE6		0.416548	-0.210138		0.42897	-0.115659		50S ribosomal protein L29 OS=Methanococcus maripaludis (strain S2 / LL) OX=267377 GN=rpl29 PE=3 SV=1								2	2	2	26.8	26.8	26.8	7.784	0	4.6006	118660000	3	14.8241	14.8048	14.1558	14.9403	14.9295	14.5295	15.0429	14.3518	15.0361	14.81	16.9543	17.0009	17.4093	17.2024	17.1652	17.4831	17.1691	17.1427	17.2602	17.1673
Q6LXP4;REV__Q6LXW0		0.341411	-0.210592		1.22488	-0.211792		Uncharacterized protein OS=Methanococcus maripaludis (strain S2 / LL) OX=267377 GN=MMP1305 PE=4 SV=1								12	12	12	31.7	31.7	31.7	51.655	0	67.441	672800000	12	18.5149	18.4832	18.8211	18.7304	19.0043	19.537	18.2497	18.7641	18.6164	18.8095	16.0916	16.0175	15.8389	16.1073	16.2134	15.9802	16.2659	16.3692	16.2307	16.113
Q6LWK5		0.723809	-0.21233		0.479049	0.0751635		Conserved hypothetical archeal protein OS=Methanococcus maripaludis (strain S2 / LL) OX=267377 GN=MMP1704 PE=4 SV=1								5	5	5	34.4	34.4	34.4	17.122	0	14.802	606570000	9	17.5587	17.6193	17.513	17.5307	17.4944	17.6748	18.0697	17.9575	17.9288	17.7049	17.8689	17.853	17.7389	17.9054	17.701	17.6424	17.8296	17.6167	17.7755	17.6688
Q6LWS6		0.58879	-0.212378		0.310706	0.0577583		ATP/GTP-binding site motif A (P-loop):ABC transporter:AAA ATPase OS=Methanococcus maripaludis (strain S2 / LL) OX=267377 GN=MMP1630 PE=4 SV=1								16	16	16	32.6	32.6	32.6	61.494	0	52.781	860410000	23	19.155	19.0185	19.2557	19.2507	19.4735	19.867	19.1274	19.258	19.1562	19.3425	18.8627	19.1973	19.0691	19.0697	18.9641	18.9942	19.0105	19.0303	18.8429	18.9928
P61428		2.26743	-0.213922		0.470733	0.0628408		Phosphomethylpyrimidine synthase OS=Methanococcus maripaludis (strain S2 / LL) OX=267377 GN=thiC PE=3 SV=1								8	8	8	23.7	23.7	23.7	47.166	0	25.659	1856500000	14	18.3007	18.1749	18.2467	18.5179	18.48	18.5162	18.4477	18.467	18.2995	18.3712	18.1559	18.3946	18.3365	18.2094	18.1975	18.3107	18.1568	18.2062	18.3165	18.175
P61519		0.861616	-0.21517		0.321028	-0.105331		DNA-directed RNA polymerase subunit H OS=Methanococcus maripaludis (strain S2 / LL) OX=267377 GN=rpoH PE=3 SV=1								4	4	4	61.5	61.5	61.5	8.7822	0	27.066	1211900000	11	17.465	17.1793	17.4797	17.3888	17.5111	17.9271	17.6584	17.5157	17.5381	17.5282	18.6507	18.0431	18.5094	18.4759	18.5629	18.2781	18.5343	18.6198	18.5675	18.4874
Q6M136		1.46564	-0.215553		1.68368	-0.604282		GXGXG domain-containing protein OS=Methanococcus maripaludis (strain S2 / LL) OX=267377 GN=MMP0082 PE=4 SV=1								11	11	11	37.3	37.3	37.3	29.055	0	38.731	3349600000	22	19.9953	20.0876	20.0885	20.248	20.3823	20.4619	20.1906	20.0896	20.2638	20.1631	20.0449	20.1242	20.4786	20.773	20.401	20.9768	20.8702	20.6087	21.2913	20.7518
Q6M0C0		1.08693	-0.216365		0.884529	-0.229108		DegT/DnrJ/EryC1/StrS aminotransferase OS=Methanococcus maripaludis (strain S2 / LL) OX=267377 GN=aspB-like1 PE=3 SV=1								13	13	13	48.5	48.5	48.5	40.899	0	60.36	1014000000	18	19.1354	18.8601	19.286	19.2748	19.4865	19.3308	19.3136	19.3258	19.1295	19.3202	18.7177	18.9052	19.1192	19.3118	19.0854	19.285	19.2924	18.8562	19.028	19.0894
Q6LYE6		1.4221	-0.221397		0.558201	-0.112273		V-type ATP synthase beta chain OS=Methanococcus maripaludis (strain S2 / LL) OX=267377 GN=atpB PE=3 SV=1								25	25	25	68.6	68.6	68.6	50.7	0	207.88	19558000000	84	21.6292	21.3389	21.6488	21.7176	21.8892	21.8699	21.711	21.7132	21.6614	21.7023	21.57	21.8641	22.016	21.8439	21.9643	22.0123	21.8447	21.9627	21.9458	21.9147
Q6M0H4		1.85604	-0.221462		0.373457	-0.251156		NMD3 domain-containing protein OS=Methanococcus maripaludis (strain S2 / LL) OX=267377 GN=MMP0296 PE=4 SV=1								3	3	3	9.9	9.9	9.9	41.787	0	7.9655	154440000	4	16.2179	16.472	16.3082	16.6311	16.5198	16.5714	16.5501	16.6325	16.4199	16.4942	15.6299	15.1477	16.3903	16.3076	15.7155	15.9647	16.3644	15.7251	15.7654	16.0679
Q6LX10		1.14263	-0.221737		0.623889	-0.161132		50S ribosomal protein L3 OS=Methanococcus maripaludis (strain S2 / LL) OX=267377 GN=rpl3 PE=3 SV=1								24	24	24	68	68	68	36.651	0	149.03	10645000000	62	21.125	21.268	21.1726	21.5028	21.5494	21.0852	21.4601	21.3776	21.4865	21.3361	21.1783	21.148	21.6435	21.5465	21.4243	21.6636	21.404	21.3542	21.5138	21.394
Q6LY31		0.513442	-0.223072		1.08599	-0.504435		Flavodoxin-like domain-containing protein OS=Methanococcus maripaludis (strain S2 / LL) OX=267377 GN=MMP1162 PE=4 SV=1								15	15	15	49.1	49.1	49.1	44.357	0	71.552	3359900000	36	20.4725	19.9096	20.0219	19.9294	20.1817	20.5917	20.303	20.4424	20.6983	20.3412	20.7248	20.3648	19.9702	20.5046	21.0282	20.4049	20.8918	21.2993	21.0173	20.7719
Q6M115		0.740458	-0.224197		0.32048	-0.126336		Pyridoxal 5-phosphate synthase subunit PdxS OS=Methanococcus maripaludis (strain S2 / LL) OX=267377 GN=pdxS PE=3 SV=1								15	15	15	53.5	53.5	53.5	32.022	0	72.996	2926400000	38	19.8452	19.6863	19.6273	19.9992	20.197	20.1969	19.5694	19.796	19.9043	19.8861	20.1205	20.1999	20.2597	19.8623	20.3805	20.6523	20.2622	20.2161	20.5448	20.2586
Q6LXP1		0.463423	-0.224234		2.02641	-0.50572		Probable transaldolase OS=Methanococcus maripaludis (strain S2 / LL) OX=267377 GN=tal PE=3 SV=1								11	11	11	53	53	53	23.442	0	55.941	3190600000	24	20.7897	20.9471	20.1993	21.2301	20.9547	20.4578	20.8914	20.663	21.0208	20.8699	19.1312	19.0733	19.3476	19.5787	19.6467	19.3284	19.8229	19.8195	19.9423	19.5531
Q6LXC3		0.546948	-0.22503		1.37307	-0.16538		TFIIS-type domain-containing protein OS=Methanococcus maripaludis (strain S2 / LL) OX=267377 GN=rpm PE=3 SV=1								4	4	4	32.4	32.4	32.4	12.295	0	35.68	1801900000	10	18.986	18.8357	19.3026	19.5835	18.9572	18.8981	19.3744	19.2566	19.5293	19.2127	17.7011	17.7392	17.768	18.0008	17.8445	18.0429	17.738	17.8974	17.8853	17.8781
Q6LYA1		1.40967	-0.22557		0.809236	-0.197921		Epimerase domain-containing protein OS=Methanococcus maripaludis (strain S2 / LL) OX=267377 GN=MMP1090 PE=4 SV=1								5	5	5	20.9	20.9	20.9	34.364	0	17.73	260500000	6	16.412	16.5366	16.4482	16.7921	16.8866	16.5195	16.676	16.5401	16.7326	16.7251	17.2747	16.9261	17.1965	17.4164	17.2198	17.4559	17.5579	17.1029	17.2291	17.2541
Q6LWN9		0.232924	-0.226071		0.0168091	-0.0319633		Arch_fla_DE domain-containing protein OS=Methanococcus maripaludis (strain S2 / LL) OX=267377 GN=flaD PE=4 SV=1								21	21	21	73.6	73.6	73.6	36.978	0	100.86	5787100000	41	20.5797	20.2531	19.3676	20.8307	20.1598	19.6513	20.9073	20.4424	19.7657	20.3062	21.7441	19.7019	20.4273	21.6724	20.0107	20.1142	21.7633	20.5946	19.7832	20.8681
Q6LYH6		0.505949	-0.226989		1.2856	-0.281545		CBFD_NFYB_HMF domain-containing protein OS=Methanococcus maripaludis (strain S2 / LL) OX=267377 GN=MMP1015 PE=4 SV=1								5	5	5	50.9	50.9	50.9	12.865	0	19.226	984770000	10	15.2996	15.5573	15.7561	15.9678	15.8245	16.1029	15.1817	15.7139	15.7972	15.7212	16.9695	17.0724	17.0569	17.453	17.2578	17.3658	17.5744	17.0027	17.2332	17.2057
Q6M0K9		2.07675	-0.231805		0.504686	-0.0528304		DNA-directed RNA polymerase subunit L OS=Methanococcus maripaludis (strain S2 / LL) OX=267377 GN=rpoL PE=3 SV=1								5	5	5	64.6	64.6	64.6	10.828	0	25.151	951960000	11	18.0808	18.1694	18.1115	18.4451	18.3524	18.31	18.2999	18.2123	18.4946	18.3022	18.4187	18.5223	18.5176	18.5006	18.5524	18.6436	18.4285	18.5336	18.5756	18.4394
Q6LXZ3		1.42062	-0.232844		0.505799	-0.19425		Diaminopimelate decarboxylase OS=Methanococcus maripaludis (strain S2 / LL) OX=267377 GN=lysA PE=3 SV=1								21	21	21	46.6	46.6	46.6	47.952	0	90.996	4489700000	31	20.7374	20.4967	20.9331	21.0328	20.8442	21.0051	20.953	20.947	20.9493	20.8812	20.0342	19.8152	19.5317	20.3557	19.7963	19.7417	20.2475	19.8823	19.9042	19.9138
Q6LYG7		0.78953	-0.235277		0.312736	0.0861629		MCM domain-containing protein OS=Methanococcus maripaludis (strain S2 / LL) OX=267377 GN=MMP1024 PE=3 SV=1								3	3	3	7	7	7	80.485	0	14.784	124200000	4	15.7384	16.0575	16.0194	16.073	16.2394	16.2661	16.0686	16.5306	15.8644	16.1128	15.1332	15.2873	15.3685	15.158	15.2625	15.4935	15.0213	15.0076	15.1181	15.1909
Q6LX08		0.76847	-0.235833		0.151483	-0.0304953		50S ribosomal protein L2 OS=Methanococcus maripaludis (strain S2 / LL) OX=267377 GN=rpl2 PE=3 SV=1								8	8	8	27.5	27.5	27.5	25.767	0	27.253	4476900000	18	20.5112	20.4394	20.027	20.6702	20.5476	20.1828	20.7496	20.5826	20.6375	20.4805	19.7556	19.7268	20.0074	19.8041	19.9603	19.967	19.7568	19.8402	19.8339	19.8051
Q6LXU4		1.59339	-0.241211		0.296642	0.132768		DUF89 domain-containing protein OS=Methanococcus maripaludis (strain S2 / LL) OX=267377 GN=MMP1253 PE=4 SV=1								7	7	7	27.4	27.4	27.4	33.501	0	22.625	316200000	12	17.2965	17.2693	17.3164	17.692	17.3446	17.4433	17.7009	17.4754	17.5555	17.3876	16.9411	17.3212	17.3057	17.5022	16.9507	17.2266	17.0987	16.8669	16.6945	17.0343
Q6LXY7		0.662772	-0.242384		0.140591	0.0449365		30S ribosomal protein S6e OS=Methanococcus maripaludis (strain S2 / LL) OX=267377 GN=rps6e PE=3 SV=1								8	8	8	62.1	62.1	62.1	13.537	0	43.056	6888300000	22	20.2783	20.2055	19.8253	20.5103	20.4417	19.8925	20.6294	20.2615	20.3369	20.2269	19.896	20.0291	20.4062	20.1711	19.9567	20.2452	19.9704	20.0084	20.0412	20.0863
Q6M0V5		0.970129	-0.242592		0.220758	-0.0521676		ArsA_ATPase domain-containing protein OS=Methanococcus maripaludis (strain S2 / LL) OX=267377 GN=arsA PE=4 SV=1								17	17	17	51.9	51.9	51.9	38.769	0	61.96	3709900000	39	19.8097	19.6337	19.7567	19.9253	20.0004	20.1112	20.3028	19.7884	19.7279	19.9005	20.6741	20.7496	20.6453	20.8157	20.6504	20.5118	20.7668	20.7315	20.9746	20.6771
Q6M0T8		1.58027	-0.247786		1.2355	-0.205599		Riboflavin synthase OS=Methanococcus maripaludis (strain S2 / LL) OX=267377 GN=ribC PE=3 SV=1								5	5	5	27.6	27.6	27.6	17.336	0	8.279	356170000	9	17.7407	17.8635	18.097	18.0475	18.1716	18.0447	18.2763	18.1276	18.2216	18.0339	18.5597	18.5375	18.6634	18.7512	18.7809	18.6624	18.918	18.6336	19.0089	18.723
Q6M066		1.36741	-0.251162		1.53719	0.667883		GTP cyclohydrolase III OS=Methanococcus maripaludis (strain S2 / LL) OX=267377 GN=gch3 PE=3 SV=1								11	11	11	36.8	36.8	36.8	29.942	0	76.643	1350100000	17	18.8982	18.4466	18.767	19.0432	18.9798	18.9425	19.0202	18.7999	18.9448	18.841	18.3384	19.333	18.9787	18.1302	18.3417	18.6018	18.021	18.3086	17.8895	18.3156
Q6M138		1.74331	-0.251659		1.16696	-0.28606		Glutamine amidotransferase type-2 domain-containing protein OS=Methanococcus maripaludis (strain S2 / LL) OX=267377 GN=MMP0080 PE=4 SV=1								16	16	16	38	38	38	41.357	0	51.539	2507000000	25	20.0311	20.0444	20.2325	20.2586	20.4136	20.5662	20.3154	20.2736	20.2985	20.2384	19.7642	19.9763	20.0105	20.266	19.9604	20.1177	20.3201	20.036	20.5181	20.1476
Q6LXR3		2.27873	-0.252704		0.352809	-0.0913556		DNA primase DnaG OS=Methanococcus maripaludis (strain S2 / LL) OX=267377 GN=dnaG PE=3 SV=1								16	16	16	34.2	34.2	34.2	48.636	0	65.446	1493900000	26	19.6878	19.7186	19.8934	20.0734	20.0144	20.1171	20.0064	20.0228	19.8819	19.9341	19.5933	19.7854	19.416	19.8904	19.6743	19.5089	19.8271	19.5595	19.6774	19.6569
Q6M0L6		1.37361	-0.254137		0.746578	0.203207		Bifunctional NAD(P)H-hydrate repair enzyme OS=Methanococcus maripaludis (strain S2 / LL) OX=267377 GN=nnrE PE=3 SV=1								3	3	3	5.9	5.9	5.9	56.76	0	9.9108	69474000	4	14.0693	13.5864	13.8829	14.19	13.9907	14.1447	14.0275	14.1189	14.13	13.9547	15.5204	16.0269	15.7613	15.5899	15.8267	15.363	15.4477	15.5274	15.6433	15.5926
Q6M0H3		0.93069	-0.256397		0.316298	-0.0736322		Translation initiation factor 2 subunit beta OS=Methanococcus maripaludis (strain S2 / LL) OX=267377 GN=eif2b PE=3 SV=1								5	5	5	42	42	42	15.97	0	36.737	1149200000	12	17.9699	18.1155	18.3315	18.2584	18.5545	18.6372	18.5562	18.2259	18.14	18.1842	18.4353	18.5589	18.3999	18.7359	18.4396	18.3263	18.7033	18.4812	18.5435	18.5337
Q6M0C3		0.155678	-0.256773		0.0566703	0.0796719		Uncharacterized protein OS=Methanococcus maripaludis (strain S2 / LL) OX=267377 GN=MMP0348 PE=4 SV=1								1	1	1	5.1	5.1	5.1	21.273	0	4.6371	252000000	4	15.8528	16.0459	17.3806	16.1043	17.2588	18.2431	15.6828	16.2722	16.538	16.7803	16.3712	18.4216	18.3148	18.0012	17.1427	18.005	17.9403	17.2161	17.4318	17.8733
Q6LZM0		0.72783	-0.258075		0.553704	0.108963		RIO domain-containing protein OS=Methanococcus maripaludis (strain S2 / LL) OX=267377 GN=MMP0604 PE=4 SV=1								2	2	2	12.1	12.1	12.1	32.381	0	6.47	37037000	2	12.6837	13.1805	12.999	13.3076	13.2817	13.5497	12.8237	13.2675	13.0448	12.8399	15.0808	15.28	15.0537	15.1223	14.8702	14.9677	15.0381	15.2394	14.9374	15.0586
Q6LYP0		0.505677	-0.259137		1.1899	0.152083		Uncharacterized protein OS=Methanococcus maripaludis (strain S2 / LL) OX=267377 GN=MMP0950 PE=4 SV=1								2	2	2	6.7	6.7	6.7	55.01	0	12.597	31060000	2	12.9499	12.7556	11.8685	12.994	12.9026	12.6975	12.5824	12.6618	12.8646	12.7523	15.59	15.3509	15.466	15.2592	15.3661	15.4558	15.2844	15.3309	15.2049	15.3016
Q6LZ13		0.989339	-0.259903		0.947083	-0.272578		PC4 domain-containing protein OS=Methanococcus maripaludis (strain S2 / LL) OX=267377 GN=MMP0816 PE=4 SV=1								5	5	5	45.2	45.2	45.2	8.827	0	24.277	976660000	8	17.7425	18.3102	17.8231	18.3173	18.1505	18.2902	18.1051	18.0705	18.3774	18.0767	18.6672	18.6028	18.464	18.6997	19.1195	18.9532	18.7239	18.5127	19.0946	18.8234
Q6LXE4		1.03144	-0.260025		0.60687	-0.138301		30S ribosomal protein S17 OS=Methanococcus maripaludis (strain S2 / LL) OX=267377 GN=rps17 PE=3 SV=1								5	5	5	33	33	33	12.141	0	15.751	3560800000	11	20.28	20.2821	20.3092	20.7654	20.6062	20.2962	20.7081	20.2442	20.6824	20.4246	20.2315	20.175	20.6418	20.5552	20.3296	20.4857	20.5803	20.4796	20.496	20.4569
Q6LZN6		0.785097	-0.26066		0.727369	0.218956		Diphthine synthase OS=Methanococcus maripaludis (strain S2 / LL) OX=267377 GN=dphB PE=3 SV=1								3	3	3	11.4	11.4	11.4	28.771	0	7.4144	29721000	4	13.237	12.7365	13.3513	13.2741	13.431	13.4423	13.5588	13.4762	13.0312	13.1387	16.0491	16.2699	16.552	16.0622	16.1	16.4337	15.8931	16.0055	15.9337	16.1084
Q6M020		0.971051	-0.260981		0.101197	-0.0743135		Zinc metalloprotease OS=Methanococcus maripaludis (strain S2 / LL) OX=267377 GN=MMP0453 PE=3 SV=1								2	2	2	5.8	5.8	5.8	35.96	0	5.0219	144990000	3	15.1971	15.4451	15.3525	15.5588	15.6229	15.3914	15.5968	15.9967	15.3886	15.5406	17.2071	17.4661	16.5908	16.9648	17.4381	16.5747	17.1026	17.4719	17.4218	17.1135
Q6LWP8		0.422878	-0.262239		1.00689	0.350749		Uncharacterized protein OS=Methanococcus maripaludis (strain S2 / LL) OX=267377 GN=MMP1661 PE=4 SV=1								3	3	3	66.2	66.2	66.2	7.7729	0	21.658	166530000	4	16.5195	16.5922	16.2699	16.3529	16.5288	17.231	16.3914	16.4632	17.3697	16.6772	14.5813	14.5804	14.8162	13.9611	14.3362	14.1634	14.1034	14.7623	14.5251	14.405
Q6LZY4		0.610277	-0.265535		0.199611	-0.174164		Uncharacterized protein OS=Methanococcus maripaludis (strain S2 / LL) OX=267377 GN=MMP0489 PE=4 SV=1								2	2	2	13.7	13.7	13.7	16.197	0	11.568	1326600000	8	16.8984	16.9094	17.3697	17.5323	17.2856	16.7246	17.431	17.4749	17.4996	17.4676	16.9608	18.3206	17.4199	18.2209	17.6083	17.9126	17.8463	17.0759	17.7835	17.7534
Q6M0Y2		0.950331	-0.265804		0.569329	0.20005		3-isopropylmalate dehydratase small subunit OS=Methanococcus maripaludis (strain S2 / LL) OX=267377 GN=leuD PE=3 SV=1								4	4	4	29.9	29.9	29.9	18.248	0	15.891	430230000	8	18.2266	18.1157	18.5028	18.5085	18.7106	18.8643	18.5005	18.428	18.2731	18.5064	17.2401	17.6754	17.7473	17.4841	17.1564	17.7104	17.3889	17.1543	17.231	17.4421
Q6M0U0		1.31944	-0.266145		0.364618	-0.0661236		Phosphoribosylformylglycinamidine synthase subunit PurQ OS=Methanococcus maripaludis (strain S2 / LL) OX=267377 GN=purQ PE=3 SV=1								7	7	7	27.9	27.9	27.9	30.466	0	27.745	505890000	14	17.3618	17.2328	17.5875	17.513	17.6799	17.9356	17.5632	17.6373	17.6319	17.5742	18.4452	18.2325	18.4778	18.3086	18.4005	18.4469	18.4125	18.5755	18.5637	18.4778
Q6LYF4		1.16622	-0.266191		0.292936	-0.0927305		Putative ribosomal RNA large subunit methyltransferase H OS=Methanococcus maripaludis (strain S2 / LL) OX=267377 GN=rlmH PE=3 SV=1								2	2	2	11.3	11.3	11.3	18.162	0	4.3428	71309000	3	14.5538	14.9448	14.3931	14.8287	14.7594	14.9998	14.8375	14.9457	15.0095	14.8427	14.8849	14.6814	14.6964	14.8062	15.1179	14.8887	14.6508	14.5798	15.0386	14.7416
Q6LZB4		2.37858	-0.267282		0.342275	-0.117171		Coenzyme F390 synthetase II OS=Methanococcus maripaludis (strain S2 / LL) OX=267377 GN=MMP0715 PE=4 SV=1								6	6	6	19	19	19	48.685	0	14.693	184910000	7	16.6832	16.6425	16.5944	16.8121	16.9367	17.0887	16.9328	16.8307	16.8429	16.8529	16.6293	16.5206	17.1123	16.9701	16.7291	17.0076	16.9689	16.649	16.9029	16.8285
Q6LYI0		1.79759	-0.270947		0.0341794	0.017897		Glutamate--tRNA ligase OS=Methanococcus maripaludis (strain S2 / LL) OX=267377 GN=gltX PE=3 SV=1								14	14	14	27.2	27.2	27.2	64.094	0	40.811	696170000	21	17.4214	17.5308	17.6094	17.8067	17.8916	17.737	17.9882	17.6573	17.6682	17.7086	18.839	19.0722	19.6369	19.1731	19.2006	19.4545	19.0642	19.0079	19.0884	19.2046
Q6LXD7		0.726077	-0.271708		0.475532	-0.116126		50S ribosomal protein L6 OS=Methanococcus maripaludis (strain S2 / LL) OX=267377 GN=rpl6 PE=3 SV=1								12	12	12	61	61	61	19.97	0	59.784	6585800000	37	20.7859	20.7704	20.2041	21.1005	20.8789	20.4392	20.9548	20.7895	20.9882	20.8475	20.8232	20.9163	21.2872	21.1137	21.0468	21.3189	21.0257	21.094	21.151	21.1175
Q6LXC1		1.11317	-0.271876		0.206521	0.123523		2-phosphoglycerate kinase OS=Methanococcus maripaludis (strain S2 / LL) OX=267377 GN=pgk2 PE=3 SV=1								9	9	9	36.9	36.9	36.9	35.858	0	29.938	371690000	13	16.4277	16.4196	16.9898	16.8522	16.8747	16.9378	16.7914	16.8483	17.0008	16.7921	16.8483	17.6694	16.9343	16.9081	17.1039	16.8267	16.8523	17.5646	16.9074	17.2355
Q6LYT0		0.767056	-0.27214		0.317576	0.140879		CBS domain OS=Methanococcus maripaludis (strain S2 / LL) OX=267377 GN=MMP0908 PE=4 SV=1								8	8	8	57.9	57.9	57.9	14.193	0	42.354	1502100000	15	18.2342	18.3703	18.6587	18.5962	18.6248	19.0835	18.2853	18.7527	18.8167	18.6673	19.4002	19.2736	18.7902	18.9851	18.9675	18.5738	19.1658	19.265	19.1254	19.0806
Q6LWX0		2.756	-0.275129		0.420498	0.110325		Polyamine aminopropyltransferase OS=Methanococcus maripaludis (strain S2 / LL) OX=267377 GN=speE PE=3 SV=1								6	6	6	22.9	22.9	22.9	31.816	0	28.606	573470000	9	16.6065	16.4447	16.5824	16.833	16.8944	16.6815	16.8089	16.8822	16.8179	16.7801	17.8196	18.0752	18.2778	17.9252	17.9342	18.2098	17.8388	17.8858	17.8893	17.9745
Q6LWP6		1.28386	-0.275267		1.66727	0.476162		DUF521 domain-containing protein OS=Methanococcus maripaludis (strain S2 / LL) OX=267377 GN=MMP1663 PE=4 SV=1								5	5	5	16.5	16.5	16.5	43.716	0	17.737	220210000	8	16.9328	16.886	17.0289	17.1868	17.3304	17.5642	17.0902	17.0877	17.0878	17.2265	14.6236	15.2442	15.2552	14.6624	14.4205	14.6955	14.5681	14.684	14.3586	14.8837
Q6LXB1		0.921005	-0.276392		0.0867589	0.01885		4Fe-4S domain-containing protein OS=Methanococcus maripaludis (strain S2 / LL) OX=267377 GN=mobB PE=4 SV=1								8	8	8	38.4	38.4	38.4	25.114	0	30.884	290700000	14	17.6616	17.3532	18.1192	18.0184	17.8274	18.0142	18.1062	17.9438	18.0163	17.9455	18.2113	18.0293	18.1812	17.8838	18.1566	18.1613	18.1887	18.1545	18.1855	18.1129
Q6LXA7		3.40022	-0.276581		0.709363	-0.311454		GMP synthase [glutamine-hydrolyzing] subunit A OS=Methanococcus maripaludis (strain S2 / LL) OX=267377 GN=guaAA PE=3 SV=1								5	5	5	32.8	32.8	32.8	20.884	0	19.983	801020000	9	18.6222	18.5216	18.4825	18.8123	18.7592	18.7896	18.8734	18.9029	18.7746	18.6052	17.7229	17.6231	18.4084	18.4293	18.1492	18.5602	18.3002	17.9517	17.9867	18.1442
Q6M0E5		0.968363	-0.277078		1.45799	0.201074		Methionine--tRNA ligase OS=Methanococcus maripaludis (strain S2 / LL) OX=267377 GN=metG PE=3 SV=1								15	15	15	29.6	29.6	29.6	76.173	0	41.091	1131600000	22	19.163	19.1787	19.4006	19.374	19.6903	19.9155	19.5081	19.353	19.3061	19.4643	19.3543	19.5186	19.5995	19.4102	19.3067	19.356	19.3333	19.1752	19.157	19.333
Q6LZB0		1.1141	-0.277756		1.131	-0.222287		Predicted transcriptional regluator OS=Methanococcus maripaludis (strain S2 / LL) OX=267377 GN=MMP0719 PE=4 SV=1								2	2	2	15.6	15.6	15.6	15.553	0	5.6285	47232000	2	13.53	13.226	13.189	13.6014	13.3736	13.9065	13.4198	13.5928	13.6626	13.4103	14.5742	14.8323	14.337	14.868	14.7349	14.6926	14.911	14.7796	14.8345	14.723
Q6LYS6		0.584712	-0.280896		0.287815	-0.320918		Tautomerase domain-containing protein OS=Methanococcus maripaludis (strain S2 / LL) OX=267377 GN=MMP0912 PE=4 SV=1								2	2	2	46.9	46.9	46.9	7.1002	0	14.614	208400000	3	14.807	15.4044	14.646	15.4302	15.2451	15.5947	14.7424	15.1538	15.234	15.0589	15.7215	14.3829	13.9836	14.9286	15.1342	14.0111	15.2449	15.5511	15.2315	14.8305
Q6LXM3		0.992091	-0.281701		0.634462	-0.288495		DNA-directed RNA polymerase, subunit K OS=Methanococcus maripaludis (strain S2 / LL) OX=267377 GN=rpoK PE=4 SV=1								2	2	2	49.1	49.1	49.1	6.1861	0	38.676	408200000	3	15.8755	15.4544	15.565	15.9489	15.973	16.0318	15.9961	15.4925	16.0378	15.7975	14.04	13.2383	14.0431	14.2876	13.918	13.7773	14.3196	14.158	13.9133	14.1066
Q6M075		1.28961	-0.282778		0.36455	-0.111141		Enolase OS=Methanococcus maripaludis (strain S2 / LL) OX=267377 GN=eno PE=3 SV=2								17	17	17	63.8	63.8	63.8	45.928	0	159.71	3111100000	41	19.1953	19.048	19.3993	19.5288	19.5959	19.1862	19.6693	19.5452	19.4564	19.4136	19.5529	19.8919	19.7647	20.0473	19.7619	20.0242	19.9808	19.5893	19.6824	19.7764
P0CW67		1.46595	-0.286963		0.467362	-0.0715723		Lysine--tRNA ligase OS=Methanococcus maripaludis (strain S2 / LL) OX=267377 GN=lysS PE=1 SV=1								16	16	16	31.9	31.9	31.9	61.237	0	54.612	852960000	23	18.4982	18.6771	18.7208	19.0552	18.8948	18.6247	18.9928	19.0793	18.8673	18.7966	17.5658	17.4902	17.6569	17.7142	17.7996	17.5969	17.666	17.5612	17.5172	17.5298
Q6LWQ4		0.791954	-0.287811		0.749548	0.143504		Uncharacterized protein OS=Methanococcus maripaludis (strain S2 / LL) OX=267377 GN=MMP1653 PE=4 SV=1								6	6	6	7.5	7.5	7.5	121.76	0	38.262	197370000	6	16.128	16.426	16.4623	16.3814	16.6477	17.0713	16.2976	16.8102	16.5512	16.492	14.8416	15.0747	14.5931	14.6857	14.7265	14.764	14.6806	14.6145	14.6864	14.7278
Q6LXI8		3.52416	-0.289791		0.556403	-0.128085		DNA-directed RNA polymerase subunit OS=Methanococcus maripaludis (strain S2 / LL) OX=267377 GN=rpoA1 PE=3 SV=1								32	32	32	40.5	40.5	40.5	98.845	0	135.1	4081000000	60	20.9171	20.8299	20.8693	21.2315	21.2183	21.0677	21.1955	21.0913	21.1668	21.0962	21.0392	20.541	20.9729	21.0107	20.9873	20.8689	21.023	21.0368	20.948	20.9279
Q6LXI7		2.05248	-0.289848		0.44347	-0.146574		DNA-directed RNA polymerase subunit A OS=Methanococcus maripaludis (strain S2 / LL) OX=267377 GN=rpoA2 PE=3 SV=1								15	15	15	50.5	50.5	50.5	42.795	0	82.422	2172500000	31	19.7742	19.6085	19.7941	20.0126	20.0706	19.8803	20.2166	19.9854	19.9271	19.9495	20.4353	19.7062	20.2744	20.3205	20.2698	20.1669	20.2905	20.348	20.3155	20.2178
Q6LY58		1.28919	-0.29281		2.07533	-0.437353		L-sulfolactate dehydrogenase/(S)-hydroxyglutaric acid dehydrogenase OS=Methanococcus maripaludis (strain S2 / LL) OX=267377 GN=comC PE=4 SV=1								4	4	4	20.2	20.2	20.2	37.094	0	16.936	284330000	6	16.7487	17.0912	16.7801	17.3949	17.2202	17.115	16.9611	17.0009	17.3046	16.9758	16.2072	15.7087	15.8475	16.2969	16.2332	16.3882	16.5784	16.3163	16.3378	16.3569
Q6LZ75		0.264405	-0.293039		0.566188	-0.211487		Uncharacterized protein OS=Methanococcus maripaludis (strain S2 / LL) OX=267377 GN=MMP0754 PE=4 SV=1								2	2	2	5.3	5.3	5.3	51.623	0	4.7803	155380000	3	15.3731	15.4884	16.247	15.7887	15.6937	17.3976	15.438	15.9695	15.6877	16.1142	15.6589	15.5604	15.4889	15.663	16.2511	15.8645	15.4398	15.5572	15.9097	15.7492
Q6M178		0.430722	-0.293415		0.668157	-0.132283		T2SSF domain-containing protein OS=Methanococcus maripaludis (strain S2 / LL) OX=267377 GN=MMP0039 PE=4 SV=1								3	3	3	13.4	13.4	13.4	39.807	0	24.274	202020000	7	15.4561	15.4986	15.7571	15.5009	16.0288	16.7953	15.463	15.5895	15.8066	15.7033	16.3351	16.0126	16.1129	16.3065	16.2433	16.1029	16.4442	16.2215	16.3965	16.1377
Q6LYC8		1.40099	-0.293878		0.0989127	-0.0432167		Pyruvate carboxyltransferase domain-containing protein OS=Methanococcus maripaludis (strain S2 / LL) OX=267377 GN=leuA PE=3 SV=1								16	16	16	38.3	38.3	38.3	55.481	0	103.83	2210000000	27	19.1165	19.4569	19.6638	19.8018	19.672	19.5534	19.7536	19.7449	19.7117	19.619	19.454	19.5975	19.9983	19.9303	19.6102	19.9771	19.7844	19.4796	19.5771	19.6984
Q6LZ91		1.41913	-0.294881		0.647384	-0.161709		GTP_EFTU_D2 domain-containing protein OS=Methanococcus maripaludis (strain S2 / LL) OX=267377 GN=MMP0738 PE=4 SV=1								8	8	8	22.7	22.7	22.7	34.686	0	19.269	592990000	10	18.4561	18.6542	18.7075	19.043	18.9303	18.5744	18.9962	19.0129	18.8481	18.7305	17.294	17.6393	17.7534	17.7508	17.6433	17.9536	17.7124	17.5445	17.739	17.7049
Q6M0C1		1.35102	-0.295479		0.303414	0.13845		Bacterial transferase hexapeptide repeat OS=Methanococcus maripaludis (strain S2 / LL) OX=267377 GN=MMP0350 PE=4 SV=1								3	3	3	19.9	19.9	19.9	21.587	0	11.503	201240000	6	16.0343	16.164	16.0968	16.6829	16.2963	16.1537	16.2633	16.5626	16.4044	16.1627	15.5798	16.1319	16.1019	15.9892	15.8395	16.124	15.8081	15.3969	15.6386	15.803
Q6M0G8		0.658888	-0.296245		1.02878	-0.341624		Rubredoxin-like domain-containing protein OS=Methanococcus maripaludis (strain S2 / LL) OX=267377 GN=MMP0303 PE=4 SV=1								2	2	2	17.8	17.8	17.8	5.1489	0	4.7441	257870000	3	16.1591	15.885	15.9584	15.802	15.904	16.4895	16.3744	16.6285	16.5843	16.0799	17.9252	18.0233	17.5943	18.1063	18.4643	17.7529	18.2192	18.1611	18.4314	18.0905
Q6LY86		1.70014	-0.296547		0.458034	-0.128842		ATP-grasp domain-containing protein OS=Methanococcus maripaludis (strain S2 / LL) OX=267377 GN=sucC PE=4 SV=1								7	7	7	24.6	24.6	24.6	39.611	0	50.996	445030000	10	17.7426	17.7044	17.9661	18.0363	18.1955	18.0156	18.3151	18.1162	17.9268	18.0831	16.704	16.9673	17.1878	17.2261	17.131	17.2084	17.1148	16.8343	16.9766	17.0115
Q6LYQ8		0.877296	-0.297117		0.209518	-0.200283		CheR-type methyltransferase domain-containing protein OS=Methanococcus maripaludis (strain S2 / LL) OX=267377 GN=cheR PE=4 SV=1								4	4	4	19.3	19.3	19.3	32.593	0	7.9425	111070000	4	16.7293	17.2989	16.7088	17.5688	17.146	17.2001	17.0636	17.2773	17.001	17.0189	16.5399	15.1121	15.6543	16.5039	15.7456	15.654	16.5496	15.8774	15.4838	16.0445
Q6M0L1		1.28629	-0.297737		0.405508	-0.111499		50S ribosomal protein L10 OS=Methanococcus maripaludis (strain S2 / LL) OX=267377 GN=rpl10 PE=1 SV=1								25	25	25	73.7	73.7	73.7	35.805	0	129.06	13730000000	61	21.8689	21.9674	21.6601	22.1644	22.1869	21.8089	22.3899	22.1425	22.0869	22.0257	21.1856	21.3019	21.6645	21.5182	21.4661	21.7347	21.354	21.4138	21.4862	21.4588
Q6LXD5		1.11591	-0.29897		0.373643	0.0561177		50S ribosomal protein L19e OS=Methanococcus maripaludis (strain S2 / LL) OX=267377 GN=rpl19e PE=3 SV=1								6	6	6	24.8	24.8	24.8	17.301	0	13.548	1516500000	12	19.2312	19.0942	18.6881	19.4447	19.2465	19.0099	19.3767	19.3128	19.4301	19.2322	18.4662	18.4477	18.6342	18.6033	18.4774	18.5157	18.3955	18.3906	18.3772	18.3905
Q6LZP4		0.784183	-0.300683		1.20293	-0.354388		Elp3 domain-containing protein OS=Methanococcus maripaludis (strain S2 / LL) OX=267377 GN=act PE=4 SV=1								4	4	4	21.6	21.6	21.6	30.28	0	15.236	245090000	6	16.7074	16.9026	16.8582	17.0621	17.1585	17.715	16.776	16.9669	17.0621	17.0699	17.4117	17.8199	17.9856	17.9485	18.1327	18.4295	17.9002	18.1509	17.9988	18.0363
Q6LXG0		1.36242	-0.301757		1.96589	-0.105629		Aspartate-semialdehyde dehydrogenase OS=Methanococcus maripaludis (strain S2 / LL) OX=267377 GN=asd PE=3 SV=1								13	13	13	49.4	49.4	49.4	37.881	0	68.361	4136300000	29	20.1043	20.0766	20.3935	20.2591	20.5192	20.7601	20.5897	20.3957	20.4355	20.3609	19.9811	20.0393	20.1334	20.149	20.1375	20.1722	20.1402	20.1698	20.1726	20.1156
Q6LXT8		1.84462	-0.30183		0.262814	-0.155425		NAD(P)H: rubredoxin oxidoreductase (NPOR) OS=Methanococcus maripaludis (strain S2 / LL) OX=267377 GN=MMP1259 PE=4 SV=1								10	10	10	25.1	25.1	25.1	47.513	0	29.915	641070000	17	18.2266	18.1118	18.4827	18.5762	18.721	18.5466	18.6592	18.4616	18.4884	18.5278	18.2982	18.6204	19.0551	18.9169	18.7544	19.4097	18.6838	18.4267	18.6884	18.7089
Q6LXI3		1.03697	-0.302287		0.141632	-0.0451457		30S ribosomal protein S7 OS=Methanococcus maripaludis (strain S2 / LL) OX=267377 GN=rps7 PE=3 SV=1								12	12	12	59.6	59.6	59.6	20.815	0	62.683	4543900000	28	19.8948	19.8659	19.5156	20.1968	20.172	19.7953	20.2762	19.7634	20.1625	19.9986	19.8169	19.8003	20.2408	20.0237	19.8204	20.2063	19.9778	19.9242	20.0345	20.0233
Q6M0L0		1.2512	-0.303709		0.432214	-0.100094		50S ribosomal protein L1 OS=Methanococcus maripaludis (strain S2 / LL) OX=267377 GN=rpl1 PE=3 SV=1								14	14	14	62.9	62.9	62.9	23.131	0	53.937	6117900000	33	20.6918	20.7063	20.4906	20.8759	21.0149	20.5912	21.2293	20.9833	20.9049	20.8101	20.3528	20.2689	20.6459	20.6165	20.4684	20.6615	20.4288	20.3562	20.6045	20.495
Q6LYV5		1.51033	-0.304277		0.328048	-0.112437		Phosphoribosylformylglycinamidine cyclo-ligase OS=Methanococcus maripaludis (strain S2 / LL) OX=267377 GN=purM PE=4 SV=1								6	6	6	31.1	31.1	31.1	32.477	0	30.433	293270000	11	16.4477	16.4346	16.575	16.8301	16.9223	16.9968	16.7772	16.7435	16.4702	16.6579	15.9745	16.4094	16.5035	16.3546	16.4111	16.6978	16.463	16.1869	16.336	16.3348
Q6LXC5		2.38762	-0.305696		0.548239	0.1329		UPF0210 protein MMP1427 OS=Methanococcus maripaludis (strain S2 / LL) OX=267377 GN=MMP1427 PE=3 SV=1								5	5	5	14.8	14.8	14.8	48.084	0	30.986	218390000	7	16.2608	16.3149	16.5129	16.5828	16.6234	16.7264	16.8138	16.6706	16.5943	16.5908	17.8333	17.9366	18.0707	17.7941	17.8786	18.0772	17.657	17.8876	17.5891	17.8875
Q6M183		2.14942	-0.308324		1.40475	-0.166589		GTP cyclohydrolase MptA OS=Methanococcus maripaludis (strain S2 / LL) OX=267377 GN=mptA PE=3 SV=1								11	11	11	35.6	35.6	35.6	35.607	0	41.398	1530200000	19	19.2034	19.3733	19.4095	19.5846	19.648	19.8171	19.5604	19.7222	19.4902	19.4261	18.4162	18.4724	18.3885	18.607	18.563	18.5881	18.5306	18.4759	18.789	18.5014
Q6LY75		0.992034	-0.309077		0.208575	-0.092453		Endoglucanase OS=Methanococcus maripaludis (strain S2 / LL) OX=267377 GN=MMP1116 PE=3 SV=1								12	12	12	42.3	42.3	42.3	38.134	0	75.457	2576900000	25	18.9088	18.8695	18.8944	19.1461	19.2427	19.7124	18.9861	18.9504	19.1621	19.1307	20.0895	20.1704	19.8638	20.5912	20.1305	19.9337	20.3286	19.8729	19.9453	20.0526
Q6LX09		0.877075	-0.312764		0.748087	-0.183366		50S ribosomal protein L23 OS=Methanococcus maripaludis (strain S2 / LL) OX=267377 GN=rpl23 PE=3 SV=1								6	6	6	58.1	58.1	58.1	9.628	0	24.131	2906900000	13	20.3509	20.525	20.0153	20.812	20.6282	20.0943	20.7462	20.7107	20.6673	20.4831	18.6666	18.6425	19.1207	18.9703	18.9742	19.1672	18.898	18.8642	19.0859	18.937
Q6LXY8		1.58016	-0.312782		0.436655	0.125955		3-phosphoshikimate 1-carboxyvinyltransferase OS=Methanococcus maripaludis (strain S2 / LL) OX=267377 GN=aroA PE=3 SV=1								5	5	5	12.6	12.6	12.6	46.473	0	16.352	204240000	9	15.5591	15.5849	15.941	15.9874	15.9389	15.9673	16.1794	16.1381	15.8357	15.7892	16.8313	17.2541	17.1161	17.0615	16.9613	17.2013	16.8387	16.8525	16.732	16.9698
Q6LXT3		1.18912	-0.313687		0.0782631	0.0193356		Uncharacterized protein OS=Methanococcus maripaludis (strain S2 / LL) OX=267377 GN=MMP1264 PE=4 SV=1								3	3	3	6.2	6.2	6.2	56.53	0	6.371	92303000	4	15.7841	15.9545	15.7531	15.872	16.2569	16.5136	16.1698	16.1046	15.9486	16.0715	15.0478	15.0201	14.8179	15.1	14.9474	14.7358	14.948	15.0405	14.8839	15.1525
Q6M194		1.02422	-0.314477		0.556301	-0.134722		Uncharacterized protein OS=Methanococcus maripaludis (strain S2 / LL) OX=267377 GN=MMP0023 PE=4 SV=1								6	6	6	28.1	28.1	28.1	31.452	0	19.12	727020000	12	18.0056	18.0048	18.2547	18.3599	18.5094	18.8366	18.0645	18.3433	18.3034	18.361	16.614	16.799	16.8826	17.0391	16.604	17.0211	16.9517	16.7885	16.9951	16.917
Q6LZD2		2.01161	-0.316187		0.770784	0.0757942		Leucine--tRNA ligase OS=Methanococcus maripaludis (strain S2 / LL) OX=267377 GN=leuS PE=3 SV=1								9	9	9	10.6	10.6	10.6	110.69	0	37.001	342420000	10	17.9909	18.0199	18.2347	18.4397	18.4739	18.533	18.1711	18.3859	18.3846	18.3192	16.7268	16.8377	16.6817	16.6631	16.7438	16.6172	16.5789	16.7312	16.7036	16.6651
Q6LWK8		1.21785	-0.316716		0.95285	-0.174576		ACT domain-containing protein OS=Methanococcus maripaludis (strain S2 / LL) OX=267377 GN=MMP1701 PE=4 SV=1								5	5	5	30.6	30.6	30.6	18.058	0	12.252	674670000	7	16.8333	16.6044	16.9413	17.0329	17.1312	17.5094	17.0611	17.0318	16.8919	16.9869	18.3072	18.5458	18.5127	18.7046	18.4781	18.5472	18.7317	18.504	18.8133	18.5512
P61350		2.11882	-0.318307		0.0424335	0.016311		Aspartyl/glutamyl-tRNA(Asn/Gln) amidotransferase subunit B OS=Methanococcus maripaludis (strain S2 / LL) OX=267377 GN=gatB PE=3 SV=1								11	11	11	30.3	30.3	30.3	53.318	0	64.996	1040800000	21	18.8247	18.9258	19.1099	19.3884	19.3902	19.2821	19.2851	19.153	19.1321	19.1446	19.4158	19.6094	20.0638	19.7798	19.6859	19.7541	19.6749	19.566	19.6195	19.6794
Q6LXD4		0.885224	-0.319993		0.356108	-0.136973		50S ribosomal protein L18 OS=Methanococcus maripaludis (strain S2 / LL) OX=267377 GN=rpl18 PE=3 SV=1								13	13	13	56	56	56	21.409	0	60.861	4187500000	29	20.2691	19.9514	19.9261	20.3223	20.3785	19.9793	20.8675	20.2635	20.4019	20.2428	20.0991	20.0916	20.7816	20.4965	20.4129	20.6741	20.4299	20.2909	20.4621	20.404
Q6LY05		0.642958	-0.320668		0.0840352	-0.0440839		UPF0147 protein MMP1188 OS=Methanococcus maripaludis (strain S2 / LL) OX=267377 GN=MMP1188 PE=1 SV=1								5	5	5	81.3	81.3	81.3	10.233	0	34.595	1460100000	12	18.1942	18.2886	18.5749	18.6151	18.62	19.0063	18.352	18.2136	19.2324	18.6315	18.391	18.5535	19.1465	18.6131	18.5297	19.0412	18.8866	18.597	18.779	18.8085
P0CW63		1.69398	-0.321144		0.910022	-0.126999		S-adenosylmethionine synthase OS=Methanococcus maripaludis (strain S2 / LL) OX=267377 GN=mat PE=3 SV=1								15	15	15	33.8	33.8	33.8	44.291	0	54.276	6868900000	36	20.4037	20.2759	20.5968	20.684	20.9436	20.8638	20.8056	20.6153	20.5673	20.6971	20.9727	21.0604	21.2684	21.259	21.2375	21.282	21.3115	21.1381	21.1368	21.1731
Q6M0A1		1.45022	-0.322403		2.19617	0.234207		Uncharacterized protein OS=Methanococcus maripaludis (strain S2 / LL) OX=267377 GN=MMP0370 PE=4 SV=1								5	5	5	15.8	15.8	15.8	51.822	0	12.469	138500000	7	15.3087	15.0032	14.9393	15.4496	15.6156	15.5566	15.3711	15.2219	15.222	15.2431	17.1123	17.0047	17.2299	16.9013	16.8545	17.0033	16.7996	16.8232	16.9064	16.8947
Q6LZG0		1.3883	-0.32283		0.0230122	-0.00747649		30S ribosomal protein S3Ae OS=Methanococcus maripaludis (strain S2 / LL) OX=267377 GN=rps3ae PE=3 SV=1								11	11	11	61.8	61.8	61.8	25.432	0	71.971	5576800000	25	20.1257	20.0492	19.7311	20.4998	20.436	20.134	20.3407	20.0593	20.279	20.2192	20.2973	20.0935	20.6137	20.3179	20.2616	20.5079	20.3403	20.3018	20.3243	20.3559
Q6LX68		2.15639	-0.322959		1.60505	-0.32094		Energy-coupling factor transporter ATP-binding protein EcfA OS=Methanococcus maripaludis (strain S2 / LL) OX=267377 GN=ecfA PE=3 SV=1								5	5	4	17.6	17.6	14	30.567	0	8.964	564930000	6	17.5351	17.4602	17.5881	17.6589	17.876	17.9291	17.8984	18.0256	17.7165	17.6942	17.3454	17.5926	17.6294	17.9431	17.6333	17.7493	18.0851	17.7605	17.8889	17.762
Q6LWK2		1.19217	-0.32352		0.455801	0.0577361		S1 motif domain-containing protein OS=Methanococcus maripaludis (strain S2 / LL) OX=267377 GN=aIF2 alpha PE=4 SV=1								13	13	13	54.3	54.3	54.3	29.894	0	48.974	1536900000	24	19.7943	20.0076	20.2201	20.1198	20.2967	20.3349	20.551	20.5855	20.0973	20.1708	19.6137	19.5421	19.6092	19.6674	19.5375	19.4984	19.5943	19.3975	19.4884	19.4614
Q6LXM7		1.26919	-0.323763		0.0973056	0.0547727		50S ribosomal protein L18e OS=Methanococcus maripaludis (strain S2 / LL) OX=267377 GN=rpl18e PE=3 SV=1								7	7	7	49.2	49.2	49.2	12.871	0	18.637	2707100000	15	19.5183	19.2364	19.1357	19.7767	19.6723	19.4182	19.7636	19.3276	19.7652	19.5445	20.3097	20.3872	21.1613	20.5336	20.4089	20.9132	20.4738	20.5064	20.5518	20.6709
Q6LXR1		3.40684	-0.323966		0.100139	0.0439494		Uncharacterized protein OS=Methanococcus maripaludis (strain S2 / LL) OX=267377 GN=MMP1288 PE=4 SV=1								9	9	9	28	28	28	46.838	0	29.499	637080000	16	17.7848	17.7079	17.7024	18	18.1089	17.9886	18.1453	18.1284	17.9626	17.897	18.9493	19.5667	18.9833	19.0969	19.3612	19.037	18.9381	19.2654	19.0363	19.1397
Q6LXE3		0.709328	-0.325065		0.430327	-0.0955226		50S ribosomal protein L14 OS=Methanococcus maripaludis (strain S2 / LL) OX=267377 GN=rpl14 PE=3 SV=1								8	8	8	50.8	50.8	50.8	14.269	0	35.935	3572800000	15	20.7695	20.4613	20.1752	20.984	20.8986	20.2088	21.1755	20.695	20.8006	20.6716	18.3439	18.3529	18.7294	18.5495	18.4871	18.7512	18.5351	18.5272	18.5753	18.4699
Q6M0R5		2.86943	-0.326674		0.547104	-0.238861		Flavoprotein domain-containing protein OS=Methanococcus maripaludis (strain S2 / LL) OX=267377 GN=MMP0204 PE=4 SV=1								3	3	3	21	21	21	19.308	0	13.66	480830000	5	18.4118	18.2997	18.5313	18.7118	18.7142	18.845	18.6349	18.722	18.8177	18.6095	18.1735	18.3065	17.9768	18.4233	18.2731	18.4323	18.3076	17.9525	18.9582	18.32
Q6LWU1		0.465538	-0.327752		0.766835	0.270146		FeS_assembly_P domain-containing protein OS=Methanococcus maripaludis (strain S2 / LL) OX=267377 GN=MMP1615 PE=4 SV=1								7	7	7	39.4	39.4	39.4	10.635	0	18.943	4025900000	16	20.2825	19.7705	20.7311	20.1923	20.6433	21.4073	20.5114	20.1993	20.5811	20.4943	20.2953	20.9671	20.5956	20.5165	20.1771	20.4922	20.5297	20.0297	20.35	20.4539
P62065		1.99466	-0.331309		0.0293101	-0.00754229		Arginine biosynthesis bifunctional protein ArgJ OS=Methanococcus maripaludis (strain S2 / LL) OX=267377 GN=argJ PE=3 SV=1								13	13	13	39.5	39.5	39.5	43.748	0	94.908	1104400000	23	18.3467	18.5331	18.6478	18.8932	18.6681	18.7845	18.7865	18.8689	19.042	18.6709	19.3886	19.3967	19.6028	19.4318	19.6108	19.5964	19.261	19.4595	19.462	19.3822
Q6LY84		2.05632	-0.331406		0.863247	0.252544		Signal recognition particle 19 kDa protein OS=Methanococcus maripaludis (strain S2 / LL) OX=267377 GN=srp19 PE=3 SV=1								2	2	2	16.9	16.9	16.9	10.461	0	5.0127	82817000	4	16.1318	16.4028	16.0686	16.4557	16.4837	16.6389	16.6745	16.5363	16.4057	16.355	15.6404	15.7303	16.1257	15.871	15.4838	15.4358	15.7538	15.5461	15.387	15.5941
Q6LWU4		1.78851	-0.332111		1.08468	0.405638		Uncharacterized protein OS=Methanococcus maripaludis (strain S2 / LL) OX=267377 GN=MMP1610 PE=4 SV=1								3	3	3	12.9	12.9	12.9	25.915	0	7.3077	62481000	4	16.452	16.1686	15.9659	16.4269	16.5393	16.5291	16.6508	16.5833	16.436	16.4374	15.9397	15.3647	15.3162	15.4449	15.2354	14.6813	15.1967	15.1698	15.0793	15.0244
Q6LZU1		0.405432	-0.340823		0.305346	0.162553		Uncharacterized protein OS=Methanococcus maripaludis (strain S2 / LL) OX=267377 GN=MMP0532 PE=4 SV=1								12	12	12	28	28	28	56.429	0	38.686	989360000	16	17.4345	17.4597	17.9473	17.5845	17.998	19.0971	17.3874	17.8099	17.8511	17.9831	16.5696	17.3125	16.7774	16.5575	17.1166	16.473	16.5698	17.0739	16.5528	16.7713
Q6M0Q0		1.12722	-0.34091		0.75376	-0.403964		DHHA2 domain-containing protein OS=Methanococcus maripaludis (strain S2 / LL) OX=267377 GN=ppaC PE=4 SV=1								19	19	19	71.3	71.3	71.3	33.707	0	73.701	2786900000	31	20.3008	20.4098	20.443	20.5779	20.7812	21.242	20.5394	20.6583	20.5539	20.6487	20.0223	20.0979	18.9921	20.1495	20.1332	19.6975	20.1121	20.1831	20.373	20.0242
Q6LY90		1.62877	-0.341198		0.0837567	0.0305662		Acetylornithine aminotransferase OS=Methanococcus maripaludis (strain S2 / LL) OX=267377 GN=argD PE=3 SV=1								12	12	12	35.7	35.7	35.7	42.843	0	49.413	588670000	18	18.339	18.4225	18.5681	18.7254	18.9436	19.0583	18.7563	18.6588	18.5639	18.6873	17.9285	18.2002	18.4748	18.2192	18.0511	18.4133	18.2046	18.0668	18.0687	18.0532
Q6LZK2		1.11075	-0.342851		0.0974289	-0.0345952		50S ribosomal protein L14e OS=Methanococcus maripaludis (strain S2 / LL) OX=267377 GN=rpl14e PE=3 SV=1								3	3	3	32.5	32.5	32.5	8.3487	0	7.4798	3945300000	6	20.0572	20.0754	19.6485	20.4029	20.2766	19.8547	20.5433	20.2286	20.3131	20.2182	18.8444	18.8857	19.2639	19.1072	19.0608	19.2627	18.8729	18.8178	19.0742	18.9945
Q6LZ74		1.43932	-0.347215		0.245924	0.0851205		AAA_5 domain-containing protein OS=Methanococcus maripaludis (strain S2 / LL) OX=267377 GN=MMP0755 PE=4 SV=1								9	9	9	21.2	21.2	21.2	69.8	0	37.683	522090000	14	17.3322	17.4547	17.918	17.7556	18.076	17.9989	17.9143	17.8577	17.8906	17.845	18.6673	18.5619	18.3307	18.4886	18.692	18.0894	18.5401	18.2972	18.5016	18.377
Q6M168		1.20791	-0.348898		1.55088	-0.572095		Carbonic anhydrase (Gamma family Zn(II)-dependent enzymes) OS=Methanococcus maripaludis (strain S2 / LL) OX=267377 GN=MMP0049 PE=4 SV=1								1	1	1	9.9	9.9	9.9	16.084	0	7.36	91909000	3	13.1674	12.932	13.4246	13.6874	13.4432	13.7616	13.1785	13.6227	13.4478	13.439	15.2126	15.5627	14.6542	15.5805	15.8031	15.8046	15.4511	15.6622	15.9901	15.4581
Q6M0J4		1.20532	-0.349812		0.317536	-0.0376498		TPR_REGION domain-containing protein OS=Methanococcus maripaludis (strain S2 / LL) OX=267377 GN=MMP0276 PE=4 SV=1								4	4	4	14	14	14	38.978	0	9.6065	153860000	8	16.2819	16.4111	16.1884	16.7727	16.4922	16.235	16.6948	16.9798	16.6872	16.4601	16.0705	16.0953	16.1617	16.2809	16.1542	16.095	16.187	16.1001	16.0636	16.0672
Q6LXW3		1.30143	-0.354177		0.181077	-0.0619377		TonB-dependent receptor protein:Formate dehydrogenase, subunit FdhD OS=Methanococcus maripaludis (strain S2 / LL) OX=267377 GN=MMP1233 PE=4 SV=1								2	2	2	7.1	7.1	7.1	26.908	0	4.6542	64252000	2	15.5236	15.3251	15.7661	15.8839	15.793	16.1288	15.5461	16.0599	15.9431	15.8738	15.2854	15.1284	14.8416	15.0371	15.2559	14.9022	15.2644	15.3629	15.0599	15.2047
Q6LZT4		0.950156	-0.356293		1.73126	-0.265043		Iso_dh domain-containing protein OS=Methanococcus maripaludis (strain S2 / LL) OX=267377 GN=leuB PE=4 SV=1								12	12	12	49.7	49.7	49.7	35.317	0	56.167	1915300000	23	19.2457	18.9555	19.5754	19.3542	19.8824	19.9817	19.6228	19.4212	19.4286	19.52	18.5716	18.6251	18.6525	18.9254	18.7644	19.0241	19.0363	18.6767	18.8618	18.8093
Q6LX32		1.64643	-0.356744		1.00149	-0.228703		Conserved hypothetical archaeal protein OS=Methanococcus maripaludis (strain S2 / LL) OX=267377 GN=MMP1521 PE=4 SV=1								2	2	2	19.7	19.7	19.7	15.946	0	9.0667	158630000	4	16.508	16.3822	16.7114	17.0186	16.8514	17.1451	16.8115	16.6341	16.8829	16.8789	16.7429	16.7617	16.8664	17.1691	16.9833	17.1098	17.256	16.7318	16.8643	16.9276
Q6LXU8		2.62963	-0.358469		0.152456	0.0820732		Amidohydro_3 domain-containing protein OS=Methanococcus maripaludis (strain S2 / LL) OX=267377 GN=fwdA PE=4 SV=1								23	23	23	53.1	53.1	53.1	63.265	0	90.961	15390000000	60	21.7897	21.7383	21.9794	22.0671	22.2272	22.2646	22.2807	22.2615	22.0645	22.0699	21.9174	22.1484	22.1465	22.3302	22.1419	21.4117	22.2601	21.8648	21.9235	22
P62426		1.78493	-0.359039		0.835888	-0.208847		50S ribosomal protein L7Ae OS=Methanococcus maripaludis (strain S2 / LL) OX=267377 GN=rpl7ae PE=1 SV=1								7	7	7	56.4	56.4	56.4	12.381	0	41.459	5264400000	22	19.7712	19.7582	19.656	20.1693	20.0704	19.7937	20.3669	20.0262	20.0984	19.8631	19.1109	19.222	19.5917	19.5157	19.4584	19.7457	19.4294	19.3445	19.6086	19.4427
Q6LYG5		1.5058	-0.359345		0.483642	-0.0398178		Arginine--tRNA ligase OS=Methanococcus maripaludis (strain S2 / LL) OX=267377 GN=argS PE=3 SV=1								24	24	24	41.3	41.3	41.3	64.132	0	120.46	3094400000	40	19.4338	19.6881	20.1203	20.0915	20.1001	20.1645	20.1458	20.0964	20.0422	20.0069	19.9916	19.891	19.9851	19.9076	20.0503	19.9681	19.9971	20.041	20.0103	19.963
Q6LZB3		1.63573	-0.359605		0.961614	-0.123533		ACT domain-containing protein OS=Methanococcus maripaludis (strain S2 / LL) OX=267377 GN=MMP0716 PE=4 SV=1								4	4	4	32.6	32.6	32.6	15.619	0	20.342	482870000	8	17.1902	17.2868	17.3898	17.8123	17.6288	17.8446	17.5543	17.312	17.739	17.5276	17.5985	17.5167	17.6152	17.79	17.5505	17.8415	17.7328	17.6385	17.6488	17.6559
Q6LWW6		1.94286	-0.362143		0.357806	0.104816		D-3-phosphoglycerate dehydrogenase OS=Methanococcus maripaludis (strain S2 / LL) OX=267377 GN=serA PE=3 SV=1								14	14	14	36.5	36.5	36.5	56.409	0	98.16	1530200000	21	19.4511	19.5688	19.7613	19.9388	20.1663	19.8492	20.0443	19.9918	19.745	19.7878	19.0898	19.3881	19.5134	19.3565	19.1796	19.4377	19.2759	18.9952	19.1088	19.1965
P61193		1.27269	-0.362169		0.6556	-0.170442		30S ribosomal protein S24e OS=Methanococcus maripaludis (strain S2 / LL) OX=267377 GN=rps24e PE=1 SV=1								10	10	10	81.4	81.4	81.4	11.458	0	68.301	5244200000	29	20.2837	20.2615	19.925	20.7126	20.5452	20.2329	20.7587	20.248	20.6161	20.5117	20.1631	20.1795	20.6728	20.561	20.4213	20.6967	20.4678	20.4089	20.4978	20.4655
Q6LWK7		1.05134	-0.36476		0.0722569	0.0174303		Homoserine dehydrogenase OS=Methanococcus maripaludis (strain S2 / LL) OX=267377 GN=hom PE=4 SV=1								9	9	9	28.5	28.5	28.5	36.294	0	44.933	820500000	13	17.9394	17.8834	18.1558	18.2549	18.5816	18.8499	18.113	18.225	18.1214	18.2453	18.7695	18.6604	18.9647	18.828	18.659	18.8847	18.8533	18.6302	18.8296	18.7719
Q6LXP2		0.936457	-0.368469		0.633413	-0.129421		PUA domain-containing protein OS=Methanococcus maripaludis (strain S2 / LL) OX=267377 GN=MMP1307 PE=4 SV=1								3	3	3	9.7	9.7	9.7	43.44	0	10.708	126300000	5	17.07	16.9703	16.952	17.3018	17.3057	17.0935	17.8643	17.666	16.964	17.1554	16.2999	16.3428	16.4976	16.6047	16.6175	16.6674	16.4801	16.2594	16.4281	16.3775
Q6LXT2		2.04518	-0.369197		0.114533	0.0282987		Glutamyl-tRNA(Gln) amidotransferase subunit E OS=Methanococcus maripaludis (strain S2 / LL) OX=267377 GN=gatE PE=3 SV=1								33	33	33	54.7	54.7	54.7	71.169	0	141.71	3265700000	55	20.3839	20.507	20.5538	20.8204	20.9201	21.1398	20.7883	20.7697	20.6664	20.7467	20.5557	20.8333	20.8276	20.8633	20.6975	20.757	20.7942	20.5775	20.5739	20.7105
Q6LYC5		1.33352	-0.369583		0.955429	0.226756		Probable cyclic pyranopterin monophosphate synthase OS=Methanococcus maripaludis (strain S2 / LL) OX=267377 GN=moaC PE=3 SV=1								4	4	4	26.4	26.4	26.4	23.318	0	16.671	472530000	5	14.6662	15.0741	15.383	15.2776	15.4882	15.4396	15.5039	15.5074	15.2474	15.3133	17.0684	17.3025	17.4243	17.2675	16.9425	17.2248	17.0438	16.8498	16.9016	17.1507
Q6LXM5		0.981808	-0.370234		0.288258	-0.111967		30S ribosomal protein S9 OS=Methanococcus maripaludis (strain S2 / LL) OX=267377 GN=rps9 PE=3 SV=1								6	6	6	51.5	51.5	51.5	14.909	0	33.138	2711600000	21	19.9879	19.7707	19.4139	20.4381	20.1592	19.6538	20.1162	19.9177	20.2814	20.0044	19.6781	19.7158	20.3311	19.9889	19.8524	20.2855	20.0054	19.9539	20.0356	19.9919
Q6LXM0		1.84931	-0.372051		0.395217	-0.0964162		Hydrogenase expression/formation protein (HUPF/HYPC) OS=Methanococcus maripaludis (strain S2 / LL) OX=267377 GN=MMP1330 PE=4 SV=1								3	3	3	42	42	42	9.8711	0	22.163	378080000	4	16.5544	16.32	16.4318	16.5953	16.8561	17.1001	16.8199	16.6551	16.8181	16.6788	16.7293	16.8137	16.8687	16.9989	16.8937	17.0951	17.0341	16.684	16.6961	16.9099
Q6LYM4		1.63062	-0.379377		0.0464606	0.011344		TP_methylase domain-containing protein OS=Methanococcus maripaludis (strain S2 / LL) OX=267377 GN=cobA PE=3 SV=1								12	12	12	65.3	65.3	65.3	26.115	0	38.791	1335100000	20	18.9321	18.7319	18.7892	19.4251	18.9971	19.0254	19.1389	19.1042	19.492	19.2123	19.0186	19.0439	19.2416	19.2345	19.142	19.1749	19.087	18.9074	18.9944	19.0608
Q6LXM6		1.32378	-0.379838		0.731634	-0.31699		50S ribosomal protein L13 OS=Methanococcus maripaludis (strain S2 / LL) OX=267377 GN=rpl13 PE=3 SV=1								8	8	8	62.8	62.8	62.8	15.195	0	56.081	3986500000	23	20.5794	20.5139	20.1808	20.9274	20.8593	20.4007	20.9946	20.6791	20.9662	20.7508	20.1493	19.8407	20.8376	20.5854	20.4152	20.861	20.5499	20.4598	20.6859	20.5789
Q6LXN0		1.15825	-0.380593		0.172645	-0.0687326		30S ribosomal protein S4 OS=Methanococcus maripaludis (strain S2 / LL) OX=267377 GN=rps4 PE=3 SV=1								10	10	10	51.7	51.7	51.7	20.462	0	41.769	3006400000	17	19.6721	19.7847	19.2703	19.9972	20.0315	19.4786	20.1824	20.0288	20.0192	19.8617	19.2278	19.0656	19.7875	19.5518	19.3372	19.5362	19.4595	19.3145	19.3748	19.4264
Q6LWJ0		0.500788	-0.381984		0.139912	0.193803		Uncharacterized protein OS=Methanococcus maripaludis (strain S2 / LL) OX=267377 GN=MMP1719 PE=4 SV=1								2	2	2	3.5	3.5	3.5	99.974	0	7.527	25714000	3	13.9038	13.5099	13.2503	14.5508	13.8929	13.1349	14.4176	14.1643	13.4596	13.9469	15.746	13.9548	14.7863	15.337	13.9929	14.1992	15.497	14.8082	13.977	14.7552
Q6LXD6		1.42149	-0.382033		0.517178	-0.155925		50S ribosomal protein L32e OS=Methanococcus maripaludis (strain S2 / LL) OX=267377 GN=rpl32e PE=3 SV=1								6	6	6	43.7	43.7	43.7	15.535	0	14.696	3119100000	11	19.1389	19.0574	18.8531	19.4342	19.5096	19.0224	19.6944	19.2532	19.477	19.242	19.3855	19.5161	19.9831	19.8438	19.7472	20.0058	19.6773	19.6693	19.7616	19.7227
Q6LYQ9		1.28147	-0.383243		0.702633	-0.380517		Methyl-accepting transducer domain-containing protein OS=Methanococcus maripaludis (strain S2 / LL) OX=267377 GN=MMP0929 PE=4 SV=1								19	15	15	44.9	35.5	35.5	52.371	0	78.031	2747200000	32	19.1742	19.3034	18.8064	19.6585	19.4175	19.41	19.7958	19.4235	19.1623	19.4004	19.2585	18.3986	18.8441	19.6719	18.998	19.1516	19.6391	18.9877	18.8372	19.1129
Q6LXE0		1.41134	-0.383514		0.165608	-0.0477413		50S ribosomal protein L5 OS=Methanococcus maripaludis (strain S2 / LL) OX=267377 GN=rpl5 PE=3 SV=1								8	8	8	41.4	41.4	41.4	20.359	0	22.18	3610300000	23	19.9361	19.7772	19.5534	20.4082	20.1746	19.8033	20.1491	19.9778	20.3214	19.9584	19.6597	19.6118	20.0869	19.8369	19.7612	20.0028	19.7871	19.7789	19.8365	19.8442
Q6M159		0.580888	-0.383839		0.260787	0.0823844		5,10-methylenetetrahydromethanopterin reductase OS=Methanococcus maripaludis (strain S2 / LL) OX=267377 GN=mer PE=3 SV=1								29	29	29	76.2	76.2	76.2	33.823	0	205.04	108590000000	285	23.8683	23.7293	23.612	24.2408	24.0503	23.1127	24.4405	24.3495	24.5283	24.1128	24.6112	24.4342	24.2569	24.3222	24.2331	24.1243	24.4864	24.2953	24.6491	24.4351
Q6LZN3		1.68277	-0.383957		0.236593	0.0842943		Conserved hypothetical archaeal protein OS=Methanococcus maripaludis (strain S2 / LL) OX=267377 GN=MMP0591 PE=4 SV=1								2	2	2	9.6	9.6	9.6	24.219	0	6.5513	423170000	4	15.1799	15.3138	15.7059	15.6478	15.8111	16.0142	15.6759	15.7669	15.7872	15.5801	15.805	16.238	15.9077	15.7376	16.1204	15.6107	16.0586	15.875	15.9932	15.7442
P62428		1.23336	-0.386506		0.891537	-0.176474		30S ribosomal protein S4e OS=Methanococcus maripaludis (strain S2 / LL) OX=267377 GN=rps4e PE=3 SV=1								15	15	15	64.8	64.8	64.8	27.07	0	66.612	9531400000	33	20.8406	20.5731	20.4461	21.1148	21.0665	20.5687	21.3443	20.9209	21.0233	20.9003	21.1192	20.9447	21.434	21.423	21.2784	21.4158	21.3071	21.265	21.3654	21.2458
Q6LXI4		1.03019	-0.387299		0.414773	0.112245		30S ribosomal protein S12 OS=Methanococcus maripaludis (strain S2 / LL) OX=267377 GN=rps12 PE=3 SV=1								3	3	3	35.4	35.4	35.4	16.156	0	9.6501	1603600000	8	17.918	18.1395	17.4319	18.2382	18.3209	17.7443	18.4224	18.3512	18.2255	18.0809	18.2712	18.3465	18.7065	18.4477	18.2835	18.5421	18.1604	18.2824	18.2588	18.295
Q6LXF5		1.47688	-0.389027		0.0864862	0.0649939		Aminotran_1_2 domain-containing protein OS=Methanococcus maripaludis (strain S2 / LL) OX=267377 GN=MMP1396 PE=4 SV=1								6	6	6	15.2	15.2	15.2	49.487	0	14.961	264060000	9	17.3569	17.5965	17.8623	17.8567	17.9564	18.37	17.9152	17.9522	17.9148	17.8622	17.3542	18.7707	18.0728	18.0464	18.0525	18.1105	17.8556	17.9009	18.0396	18.0452
Q6LXV1		1.48332	-0.394602		0.074598	0.0341794		Tungsten containing formylmethanofuran dehydrogenase, subunit F OS=Methanococcus maripaludis (strain S2 / LL) OX=267377 GN=fwdF PE=4 SV=1								11	11	11	23.9	23.9	23.9	38.23	0	37.888	8445700000	27	20.5655	20.499	20.9756	20.8556	20.9889	21.1814	21.3713	21.1177	20.9328	20.9109	21.1904	21.5531	21.576	21.5628	21.5226	21.6694	21.4368	21.0247	21.2176	21.388
Q6LXD8		0.957478	-0.396681		0.011093	-0.00515906		30S ribosomal protein S8 OS=Methanococcus maripaludis (strain S2 / LL) OX=267377 GN=rps8 PE=3 SV=1								5	5	5	45.4	45.4	45.4	14.323	0	27.337	2366000000	12	19.2239	19.197	18.7385	19.8639	19.456	18.9207	19.5309	19.3022	19.6251	19.3984	18.691	18.6065	19.2247	19.0279	18.729	18.9972	18.902	18.6306	18.7887	18.8391
P62649		1.20654	-0.40037		1.00584	-0.247952		50S ribosomal protein L22 OS=Methanococcus maripaludis (strain S2 / LL) OX=267377 GN=rpl22 PE=3 SV=1								4	4	4	22.9	22.9	22.9	17.457	0	12.338	2699800000	9	19.0549	18.8772	18.5607	19.3235	19.306	18.8184	19.5909	19.1004	19.2485	19.1531	19.6644	19.7902	20.2526	20.27	20.0934	20.2477	20.0665	20.0465	20.178	20.0823
Q6LWP7		1.38269	-0.406248		0.753912	-0.247958		TP_methylase domain-containing protein OS=Methanococcus maripaludis (strain S2 / LL) OX=267377 GN=cbiF PE=4 SV=1								3	3	3	15.4	15.4	15.4	27.624	0	9.5242	448210000	6	16.9404	17.224	17.1692	17.3931	17.7109	17.9427	17.4152	17.374	17.2687	17.4364	17.5839	18.2991	18.0935	18.2628	18.0823	18.4671	18.1826	18.1035	18.3422	18.1764
Q6LXD2		1.39131	-0.410837		0.384043	-0.158922		50S ribosomal protein L30 OS=Methanococcus maripaludis (strain S2 / LL) OX=267377 GN=rpl30 PE=3 SV=1								12	12	12	55.2	55.2	55.2	17.269	0	33.528	5151700000	27	20.7825	20.816	20.4696	21.3161	21.1625	20.6581	21.2247	20.9766	21.263	20.97	20.9071	20.7963	21.6113	21.2692	21.1669	21.4789	21.2177	21.1377	21.3125	21.2239
Q6LZG2		1.38075	-0.412771		0.385566	-0.11248		30S ribosomal protein S2 OS=Methanococcus maripaludis (strain S2 / LL) OX=267377 GN=rps2 PE=3 SV=1								10	10	10	52.3	52.3	52.3	25.262	0	43.396	7291800000	27	20.4497	20.5606	20.2171	20.8394	20.9111	20.3723	21.1554	20.8556	20.7975	20.601	20.3625	20.3045	20.8017	20.5932	20.5289	20.8506	20.5062	20.5136	20.6198	20.5672
P61652		1.18278	-0.426548		0.608559	0.357438		MEMO1 family protein MMP1387 OS=Methanococcus maripaludis (strain S2 / LL) OX=267377 GN=MMP1387 PE=3 SV=1								2	2	2	8.5	8.5	8.5	31.92	0	7.8155	95962000	3	13.9719	14.2201	14.2924	14.5302	14.2105	14.4667	15.1507	14.6186	14.5513	14.5815	17.2129	17.3217	16.489	16.367	16.5769	16.3618	16.5179	17.3699	16.709	17.0215
Q6LWX5		1.24944	-0.430689		0.308505	-0.137288		30S ribosomal protein S15 OS=Methanococcus maripaludis (strain S2 / LL) OX=267377 GN=rps15 PE=3 SV=1								7	7	7	49.7	49.7	49.7	17.027	0	55.916	3092800000	14	19.2453	19.1757	18.8139	19.7539	19.5011	19.0753	19.7828	19.2908	19.65	19.3583	19.1925	19.2039	19.9304	19.7596	19.4816	19.7521	19.6626	19.3484	19.4731	19.5883
Q6LX14		0.359707	-0.445627		0.572206	0.251382		DUF3343 domain-containing protein OS=Methanococcus maripaludis (strain S2 / LL) OX=267377 GN=MMP1539 PE=4 SV=1								6	6	5	34.9	34.9	31.2	20.614	0	8.9293	213590000	6	15.9237	15.6153	15.4571	17.5208	15.6194	15.369	15.1734	16.3739	16.6094	16.1687	18.1445	17.7157	17.8835	17.4444	17.7927	17.4698	17.503	18.2663	17.503	17.7386
P61618		0.661537	-0.509434		0.000469338	0.000924746		Uncharacterized solute-binding protein MMP1652 OS=Methanococcus maripaludis (strain S2 / LL) OX=267377 GN=MMP1652 PE=3 SV=1								4	4	4	27.1	27.1	27.1	36.799	0	47.011	255570000	7	12.2884	13.8287	13.0543	14.0742	13.425	12.88	13.7117	13.5776	13.7308	13.4022	17.4582	17.8742	19.1048	17.475	18.104	19.6239	17.027	17.7408	18.898	18.3218
